# Supplementary material for: A photo-oxidation driven proximity labeling strategy enables profiling of mitochondrial proteome dynamics in living cells
Source: Royal Society of Chemistry journal article supplement (doi:10.1039/d2sc04087e), 2022-01-01
Supplement: d2sc04087e1.xlsx [file d2sc04087e1.xlsx]

## Sheet: HeLa cells
Mitochondrial proteome profiling of HeLa cells
Uniprot Accession	Entry Name	Protein names	Gene Names	Rep1-Log2ratio(+hv/-hv)	Rep2-Log2ratio(+hv/-hv)	Rep3-Log2ratio(+hv/-hv)	Localization			Evidence for mito	Sublocalization
							Mitochondria	Others	Un-assigned		Matrix	MIM	MOM	IMS	Unclassified
Q16540	RM23_HUMAN	39S ribosomal protein L23, mitochondrial, L23mt, MRP-L23 (L23 mitochondrial-related protein) (Mitochondrial large ribosomal subunit protein uL23m) (Ribosomal protein L23-like)	MRPL23 L23MRP RPL23L	3.91887	3.64295	3.37307	1			GOCC, MitoCarta 3.0	1	1
Q02127	PYRD_HUMAN	Dihydroorotate dehydrogenase (quinone), mitochondrial, DHOdehase, EC 1.3.5.2 (Dihydroorotate oxidase)	DHODH	3.5923	3.50084	3.27334	1			GOCC, MitoCarta 3.0		1
Q9BYN8	RT26_HUMAN	28S ribosomal protein S26, mitochondrial, MRP-S26, S26mt (28S ribosomal protein S13, mitochondrial, MRP-S13, S13mt) (Mitochondrial small ribosomal subunit protein mS26)	MRPS26 C20orf193 RPMS13	3.58168	3.16943	3.12112	1			GOCC, MitoCarta 3.0	1	1
Q9Y5J7	TIM9_HUMAN	Mitochondrial import inner membrane translocase subunit Tim9	TIMM9 TIM9 TIM9A TIMM9A	3.51406	3.62303	2.34051	1			GOCC, MitoCarta 3.0		1		1
P82664	RT10_HUMAN	28S ribosomal protein S10, mitochondrial, MRP-S10, S10mt (Mitochondrial small ribosomal subunit protein uS10m)	MRPS10 MSTP040	3.39764	1.8593	2.44477	1			GOCC, MitoCarta 3.0	1	1
Q9NR28	DBLOH_HUMAN	Diablo IAP-binding mitochondrial protein (Diablo homolog, mitochondrial) (Direct IAP-binding protein with low pI) (Second mitochondria-derived activator of caspase, Smac)	DIABLO SMAC	3.26066	3.86623	2.85557	1			GOCC, MitoCarta 3.0				1
Q16718	NDUA5_HUMAN	NADH dehydrogenase [ubiquinone] 1 alpha subcomplex subunit 5 (Complex I subunit B13) (Complex I-13kD-B, CI-13kD-B) (NADH-ubiquinone oxidoreductase 13 kDa-B subunit)	NDUFA5	3.24274	2.23772	2.46749	1			GOCC, MitoCarta 3.0		1
Q9BYD1	RM13_HUMAN	39S ribosomal protein L13, mitochondrial, L13mt, MRP-L13 (Mitochondrial large ribosomal subunit protein uL13m)	MRPL13	3.20857	2.90846	2.90194	1			GOCC, MitoCarta 3.0	1	1
P13073	COX41_HUMAN	Cytochrome c oxidase subunit 4 isoform 1, mitochondrial (Cytochrome c oxidase polypeptide IV) (Cytochrome c oxidase subunit IV isoform 1, COX IV-1)	COX4I1 COX4	3.09488	2.05892	2.66705	1			GOCC, MitoCarta 3.0		1
Q9UIJ7	KAD3_HUMAN	GTP:AMP phosphotransferase AK3, mitochondrial, EC 2.7.4.10 (Adenylate kinase 3, AK 3) (Adenylate kinase 3 alpha-like 1)	AK3 AK3L1 AK6 AKL3L	3.03397	3.16295	3.40119	1			GOCC, MitoCarta 3.0	1
Q9Y3D7	TIM16_HUMAN	Mitochondrial import inner membrane translocase subunit TIM16 (Mitochondria-associated granulocyte macrophage CSF-signaling molecule) (Presequence translocated-associated motor subunit PAM16)	PAM16 MAGMAS TIM16 TIMM16 CGI-136	3.01091	2.80298	2.32106	1			GOCC, MitoCarta 3.0	1	1
Q9Y2R9	RT07_HUMAN	28S ribosomal protein S7, mitochondrial, MRP-S7, S7mt (Mitochondrial small ribosomal subunit protein uS7m) (bMRP-27a, bMRP27a)	MRPS7	2.96007	2.71497	2.93705	1			GOCC, MitoCarta 3.0	1	1
O43464	HTRA2_HUMAN	Serine protease HTRA2, mitochondrial, EC 3.4.21.108 (High temperature requirement protein A2, HtrA2) (Omi stress-regulated endoprotease) (Serine protease 25) (Serine proteinase OMI)	HTRA2 OMI PRSS25	2.95141	3.05231	3.20223	1			GOCC, MitoCarta 3.0		1		1
Q96E29	MTEF3_HUMAN	Transcription termination factor 3, mitochondrial (Mitochondrial transcription termination factor 3, mTERF3) (mTERF domain-containing protein 1, mitochondrial)	MTERF3 MTERFD1 CGI-12	2.9494	2.72906	2.2451	1			GOCC, MitoCarta 3.0	1		1
Q9H857	NT5D2_HUMAN	5'-nucleotidase domain-containing protein 2, EC 3.1.3.-	NT5DC2	2.9423	1.35087	1.79297	1			MitoCarta 3.0	1
P30048	PRDX3_HUMAN	Thioredoxin-dependent peroxide reductase, mitochondrial, EC 1.11.1.24 (Antioxidant protein 1, AOP-1) (HBC189) (Peroxiredoxin III, Prx-III) (Peroxiredoxin-3) (Protein MER5 homolog) (Thioredoxin-dependent peroxiredoxin 3)	PRDX3 AOP1	2.94101	2.52737	1.32052	1			GOCC, MitoCarta 3.0	1
Q9HD33	RM47_HUMAN	39S ribosomal protein L47, mitochondrial, L47mt, MRP-L47 (Mitochondrial large ribosomal subunit protein uL29m) (Nasopharyngeal carcinoma metastasis-related protein 1)	MRPL47 NCM1 CGI-204	2.9157	2.02038	2.4008	1			GOCC, MitoCarta 3.0	1	1
Q8NFV4	ABHDB_HUMAN	Protein ABHD11, EC 3.-.-.- (Alpha/beta hydrolase domain-containing protein 11, Abhydrolase domain-containing protein 11) (Williams-Beuren syndrome chromosomal region 21 protein)	ABHD11 WBSCR21 PP1226	2.89817	2.53581	2.73118	1			GOCC, MitoCarta 3.0	1
Q5HYK3	COQ5_HUMAN	2-methoxy-6-polyprenyl-1,4-benzoquinol methylase, mitochondrial, EC 2.1.1.201 (Ubiquinone biosynthesis methyltransferase COQ5)	COQ5	2.88949	2.3837	2.48325	1			GOCC, MitoCarta 3.0	1	1
Q9Y2Q9	RT28_HUMAN	28S ribosomal protein S28, mitochondrial, MRP-S28, S28mt (28S ribosomal protein S35, mitochondrial, MRP-S35, S35mt) (Mitochondrial small ribosomal subunit protein bS1m)	MRPS28 MRPS35 HSPC007	2.87995	2.96805	2.75623	1			GOCC, MitoCarta 3.0	1	1
Q9P0J0	NDUAD_HUMAN	NADH dehydrogenase [ubiquinone] 1 alpha subcomplex subunit 13 (Cell death regulatory protein GRIM-19) (Complex I-B16.6, CI-B16.6) (Gene associated with retinoic and interferon-induced mortality 19 protein, GRIM-19, Gene associated with retinoic and IFN-induced mortality 19 protein) (NADH-ubiquinone oxidoreductase B16.6 subunit)	NDUFA13 GRIM19 CDA016 CGI-39	2.86531	2.69593	2.38472	1			GOCC, MitoCarta 3.0		1
P06576	ATPB_HUMAN	ATP synthase subunit beta, mitochondrial, EC 7.1.2.2 (ATP synthase F1 subunit beta)	ATP5F1B ATP5B ATPMB ATPSB	2.82588	2.47577	2.2887	1			GOCC, MitoCarta 3.0	1	1
Q9NWS8	RMND1_HUMAN	Required for meiotic nuclear division protein 1 homolog	RMND1 C6orf96	2.81169	1.83364	2.47214	1			GOCC, MitoCarta 3.0		1
Q9Y399	RT02_HUMAN	28S ribosomal protein S2, mitochondrial, MRP-S2, S2mt (Mitochondrial small ribosomal subunit protein uS2m)	MRPS2 CGI-91	2.78255	2.85159	2.30973	1			GOCC, MitoCarta 3.0	1	1
Q9BUB7	TMM70_HUMAN	Transmembrane protein 70, mitochondrial	TMEM70	2.77816	2.09882	2.04254	1			GOCC, MitoCarta 3.0		1
Q9Y2Q3	GSTK1_HUMAN	Glutathione S-transferase kappa 1, EC 2.5.1.18 (GST 13-13) (GST class-kappa) (GSTK1-1, hGSTK1) (Glutathione S-transferase subunit 13)	GSTK1 HDCMD47P	2.77511	2.28966	2.46741	1			GOCC, MitoCarta 3.0	1
Q92552	RT27_HUMAN	28S ribosomal protein S27, mitochondrial, MRP-S27, S27mt (Mitochondrial ribosomal protein S27) (Mitochondrial small ribosomal subunit protein mS27)	MRPS27 KIAA0264	2.76848	2.53082	2.52337	1			GOCC, MitoCarta 3.0	1	1
Q9Y276	BCS1_HUMAN	Mitochondrial chaperone BCS1, h-BCS1 (BCS1-like protein)	BCS1L BCS1	2.76751	1.77452	2.13673	1			GOCC, MitoCarta 3.0		1
Q9NUJ1	ABHDA_HUMAN	Palmitoyl-protein thioesterase ABHD10, mitochondrial, EC 3.1.2.22 (Acyl-protein thioesterase ABHD10) (Alpha/beta hydrolase domain-containing protein 10, Abhydrolase domain-containing protein 10) (Mycophenolic acid acyl-glucuronide esterase, mitochondrial, EC 3.1.1.93)	ABHD10	2.76256	2.71079	2.60707	1			GOCC, MitoCarta 3.0	1
Q96CU9	FXRD1_HUMAN	FAD-dependent oxidoreductase domain-containing protein 1, EC 1.-.-.-	FOXRED1 FP634	2.70076	1.87586	1.92592	1			GOCC, MitoCarta 3.0		1
P53007	TXTP_HUMAN	Tricarboxylate transport protein, mitochondrial (Citrate transport protein, CTP) (Solute carrier family 25 member 1) (Tricarboxylate carrier protein)	SLC25A1 SLC20A3	2.69987	2.35392	1.79011	1			GOCC, MitoCarta 3.0		1
Q99417	MYCBP_HUMAN	c-Myc-binding protein (Associate of Myc 1, AMY-1)	MYCBP AMY1	2.68916	1.68958	2.35918	1			GOCC					1
Q99807	COQ7_HUMAN	5-demethoxyubiquinone hydroxylase, mitochondrial, DMQ hydroxylase, EC 1.14.99.60 (Timing protein clk-1 homolog) (Ubiquinone biosynthesis monooxygenase COQ7)	COQ7	2.67923	1.95054	2.19641	1			GOCC, MitoCarta 3.0		1
O00165	HAX1_HUMAN	HCLS1-associated protein X-1 (HS1-associating protein X-1, HAX-1) (HS1-binding protein 1, HSP1BP-1)	HAX1 HS1BP1	2.67632	2.50832	2.15957	1			GOCC			1	1
Q9NUL7	DDX28_HUMAN	Probable ATP-dependent RNA helicase DDX28, EC 3.6.4.13 (Mitochondrial DEAD box protein 28)	DDX28 MDDX28	2.64052	2.33231	2.34035	1			GOCC, MitoCarta 3.0	1
Q96NB2	SFXN2_HUMAN	Sideroflexin-2	SFXN2	2.61565	2.51921	2.9914	1			GOCC, MitoCarta 3.0		1
Q9UHN1	DPOG2_HUMAN	DNA polymerase subunit gamma-2, mitochondrial (DNA polymerase gamma accessory 55 kDa subunit, p55) (Mitochondrial DNA polymerase accessory subunit) (MtPolB) (PolG-beta)	POLG2 MTPOLB	2.60433	2.45896	2.40855	1			GOCC, MitoCarta 3.0	1
Q9NPJ3	ACO13_HUMAN	Acyl-coenzyme A thioesterase 13, Acyl-CoA thioesterase 13, EC 3.1.2.- (Hotdog-fold thioesterase superfamily member 2) (Palmitoyl-CoA hydrolase, EC 3.1.2.2) (Thioesterase superfamily member 2, THEM2) [Cleaved into: Acyl-coenzyme A thioesterase 13, N-terminally processed ]	ACOT13 THEM2 HT012 PNAS-27	2.57989	2.75892	2.98119	1			GOCC, MitoCarta 3.0	1
Q96GC5	RM48_HUMAN	39S ribosomal protein L48, mitochondrial, L48mt, MRP-L48 (Mitochondrial large ribosomal subunit protein mL48)	MRPL48 CGI-118 HSPC290	2.57668	2.69863	3.25771	1			GOCC, MitoCarta 3.0	1	1
P82912	RT11_HUMAN	28S ribosomal protein S11, mitochondrial, MRP-S11, S11mt (Cervical cancer proto-oncogene 2 protein, HCC-2) (Mitochondrial small ribosomal subunit protein uS11m)	MRPS11 RPMS11 HCC2	2.57276	2.64023	1.20613	1			GOCC, MitoCarta 3.0	1	1
Q8NBN7	RDH13_HUMAN	Retinol dehydrogenase 13, EC 1.1.1.300 (Short chain dehydrogenase/reductase family 7C member 3)	RDH13 SDR7C3 PSEC0082 UNQ736/PRO1430	2.57274	2.71636	2.56905	1			GOCC, MitoCarta 3.0		1
Q12931	TRAP1_HUMAN	Heat shock protein 75 kDa, mitochondrial, HSP 75 (TNFR-associated protein 1) (Tumor necrosis factor type 1 receptor-associated protein, TRAP-1)	TRAP1 HSP75	2.56103	2.35271	2.04296	1			GOCC, MitoCarta 3.0	1	1		1
P09669	COX6C_HUMAN	Cytochrome c oxidase subunit 6C (Cytochrome c oxidase polypeptide VIc)	COX6C	2.55131	2.7955	2.18711	1			GOCC, MitoCarta 3.0		1
P23368	MAOM_HUMAN	NAD-dependent malic enzyme, mitochondrial, NAD-ME, EC 1.1.1.38 (Malic enzyme 2)	ME2	2.54904	2.15531	2.27757	1			GOCC, MitoCarta 3.0	1
Q8WWC4	MAIP1_HUMAN	m-AAA protease-interacting protein 1, mitochondrial (Matrix AAA peptidase-interacting protein 1)	MAIP1 C2orf47	2.53211	1.43031	2.65739	1			GOCC, MitoCarta 3.0	1	1
Q9BXW7	HDHD5_HUMAN	Haloacid dehalogenase-like hydrolase domain-containing 5 (Cat eye syndrome critical region protein 5)	HDHD5 CECR5	2.52856	2.0452	2.25534	1			GOCC, MitoCarta 3.0	1
Q969Z0	FAKD4_HUMAN	FAST kinase domain-containing protein 4 (Cell cycle progression restoration protein 2, Cell cycle progression protein 2) (Protein TBRG4) (Transforming growth factor beta regulator 4)	TBRG4 CPR2 FASTKD4 KIAA0948	2.51626	1.11071	2.17023	1			GOCC, MitoCarta 3.0	1
Q6P587	FAHD1_HUMAN	Acylpyruvase FAHD1, mitochondrial, EC 3.7.1.5 (Fumarylacetoacetate hydrolase domain-containing protein 1, FAH domain-containing protein 1) (Oxaloacetate decarboxylase, OAA decarboxylase, EC 4.1.1.112) (YisK-like protein)	FAHD1 C16orf36 YISKL	2.50072	2.25706	2.61067	1			GOCC, MitoCarta 3.0	1
Q9Y3D9	RT23_HUMAN	28S ribosomal protein S23, mitochondrial, MRP-S23, S23mt (Mitochondrial small ribosomal subunit protein mS23)	MRPS23 CGI-138 HSPC329	2.495	2.4622	1.8296	1			GOCC, MitoCarta 3.0	1	1
P50213	IDH3A_HUMAN	Isocitrate dehydrogenase [NAD] subunit alpha, mitochondrial, EC 1.1.1.41 (Isocitric dehydrogenase subunit alpha) (NAD(+)-specific ICDH subunit alpha)	IDH3A	2.49229	2.22732	2.34629	1			GOCC, MitoCarta 3.0	1
Q13405	RM49_HUMAN	39S ribosomal protein L49, mitochondrial, L49mt, MRP-L49 (Mitochondrial large ribosomal subunit protein mL49) (Neighbor of FAU, NOF) (Protein NOF1)	MRPL49 C11orf4 NOF1 OK/SW-cl.67	2.47571	2.98111	2.63093	1			GOCC, MitoCarta 3.0	1	1
Q9Y2Z9	COQ6_HUMAN	Ubiquinone biosynthesis monooxygenase COQ6, mitochondrial, EC 1.14.13.- (Coenzyme Q10 monooxygenase 6)	COQ6 CGI-10	2.45892	2.57384	2.17412	1			GOCC, MitoCarta 3.0		1
Q9P2R7	SUCB1_HUMAN	Succinate--CoA ligase [ADP-forming] subunit beta, mitochondrial, EC 6.2.1.5 (ATP-specific succinyl-CoA synthetase subunit beta, A-SCS) (Succinyl-CoA synthetase beta-A chain, SCS-betaA)	SUCLA2	2.45869	2.0242	1.88499	1			GOCC, MitoCarta 3.0	1
Q8WW59	SPRY4_HUMAN	SPRY domain-containing protein 4	SPRYD4	2.44872	1.78568	1.77789	1			MitoCarta 3.0	1
P27144	KAD4_HUMAN	Adenylate kinase 4, mitochondrial, AK 4, EC 2.7.4.10, EC 2.7.4.6 (Adenylate kinase 3-like) (GTP:AMP phosphotransferase AK4)	AK4 AK3 AK3L1	2.40168	2.83994	2.46427	1			GOCC, MitoCarta 3.0	1
Q16836	HCDH_HUMAN	Hydroxyacyl-coenzyme A dehydrogenase, mitochondrial, HCDH, EC 1.1.1.35 (Medium and short-chain L-3-hydroxyacyl-coenzyme A dehydrogenase) (Short-chain 3-hydroxyacyl-CoA dehydrogenase)	HADH HAD HAD1 HADHSC SCHAD	2.4014	2.35665	2.54331	1			GOCC, MitoCarta 3.0	1
P82909	KGD4_HUMAN	Alpha-ketoglutarate dehydrogenase component 4	MRPS36 KGD4 DC47	2.39254	2.28196	1.28063	1			GOCC, MitoCarta 3.0	1	1
Q9UQ90	SPG7_HUMAN	Paraplegin, EC 3.4.24.- (Cell matrix adhesion regulator) (Spastic paraplegia 7 protein)	SPG7 CAR CMAR PGN	2.39105	1.71666	2.36103	1			GOCC, MitoCarta 3.0		1
P03915	NU5M_HUMAN	NADH-ubiquinone oxidoreductase chain 5, EC 7.1.1.2 (NADH dehydrogenase subunit 5)	MT-ND5 MTND5 NADH5 ND5	2.38789	1.65152	1.70734	1			GOCC, MitoCarta 3.0		1
Q9NRX2	RM17_HUMAN	39S ribosomal protein L17, mitochondrial, L17mt, MRP-L17 (LYST-interacting protein 2) (Mitochondrial large ribosomal subunit protein bL17m)	MRPL17 LIP2	2.37428	2.79055	2.48931	1			GOCC, MitoCarta 3.0	1	1
Q08257	QOR_HUMAN	Quinone oxidoreductase, EC 1.6.5.5 (NADPH:quinone reductase) (Zeta-crystallin)	CRYZ	2.37087	2.84906	2.19212	1			MitoCarta 3.0	1
P13995	MTDC_HUMAN	Bifunctional methylenetetrahydrofolate dehydrogenase/cyclohydrolase, mitochondrial [Includes: NAD-dependent methylenetetrahydrofolate dehydrogenase, EC 1.5.1.15; Methenyltetrahydrofolate cyclohydrolase, EC 3.5.4.9 ]	MTHFD2 NMDMC	2.36963	2.82018	2.24486	1			GOCC, MitoCarta 3.0	1
Q96CB9	NSUN4_HUMAN	5-methylcytosine rRNA methyltransferase NSUN4, EC 2.1.1.- (5-methylcytosine tRNA methyltransferase NSUN4, EC 2.1.1.-) (NOL1/NOP2/Sun domain family member 4)	NSUN4	2.36585	2.65552	2.06666	1			GOCC, MitoCarta 3.0, PubMed: 21531335	1
P20674	COX5A_HUMAN	Cytochrome c oxidase subunit 5A, mitochondrial (Cytochrome c oxidase polypeptide Va)	COX5A	2.35372	1.93823	1.39985	1			GOCC, MitoCarta 3.0		1
Q96BW9	TAM41_HUMAN	Phosphatidate cytidylyltransferase, mitochondrial, EC 2.7.7.41 (CDP-diacylglycerol synthase, CDP-DAG synthase) (Mitochondrial translocator assembly and maintenance protein 41 homolog, TAM41)	TAMM41 C3orf31	2.34604	2.19447	2.59175	1			GOCC, MitoCarta 3.0		1
A4D1E9	GTPBA_HUMAN	GTP-binding protein 10 (Protein obg homolog 2, ObgH2)	GTPBP10 OBGH2 UG0751c10	2.34028	2.21297	2.26917	1			GOCC, MitoCarta 3.0	1
P42704	LPPRC_HUMAN	Leucine-rich PPR motif-containing protein, mitochondrial (130 kDa leucine-rich protein, LRP 130) (GP130)	LRPPRC LRP130	2.31203	1.86583	1.84596	1			GOCC, MitoCarta 3.0	1
Q9NVS2	RT18A_HUMAN	39S ribosomal protein S18a, mitochondrial, MRP-S18-a, Mrps18a, S18mt-a (39S ribosomal protein S18-3, mitochondrial, MRP-S18-3) (Mitochondrial large ribosomal subunit protein bS18a) (Mitochondrial large ribosomal subunit protein mL66)	MRPS18A	2.31189	2.48042	2.48587	1			GOCC, MitoCarta 3.0	1	1
Q8WVM0	TFB1M_HUMAN	Dimethyladenosine transferase 1, mitochondrial, EC 2.1.1.- (Mitochondrial 12S rRNA dimethylase 1) (Mitochondrial transcription factor B1, h-mtTFB, h-mtTFB1, hTFB1M, mtTFB1) (S-adenosylmethionine-6-N', N'-adenosyl(rRNA) dimethyltransferase 1)	TFB1M CGI-75	2.30074	2.27932	2.54042	1			GOCC, MitoCarta 3.0	1
Q96DV4	RM38_HUMAN	39S ribosomal protein L38, mitochondrial, L38mt, MRP-L38 (Mitochondrial large ribosomal subunit protein mL38)	MRPL38 HSPC262	2.29231	2.38794	2.34831	1			GOCC, MitoCarta 3.0	1	1
Q8N183	NDUF2_HUMAN	NADH dehydrogenase [ubiquinone] 1 alpha subcomplex assembly factor 2 (B17.2-like, B17.2L) (Mimitin) (Myc-induced mitochondrial protein, MMTN) (NDUFA12-like protein)	NDUFAF2 NDUFA12L	2.27926	2.01869	1.89222	1			GOCC, MitoCarta 3.0		1
Q16740	CLPP_HUMAN	ATP-dependent Clp protease proteolytic subunit, mitochondrial, EC 3.4.21.92 (Endopeptidase Clp)	CLPP	2.27921	2.14923	2.08996	1			GOCC, MitoCarta 3.0	1
Q07021	C1QBP_HUMAN	Complement component 1 Q subcomponent-binding protein, mitochondrial (ASF/SF2-associated protein p32) (Glycoprotein gC1qBP, C1qBP) (Hyaluronan-binding protein 1) (Mitochondrial matrix protein p32) (gC1q-R protein) (p33, SF2AP32)	C1QBP GC1QBP HABP1 SF2P32	2.26841	2.46037	2.29307	1			GOCC, MitoCarta 3.0	1
Q9Y2R5	RT17_HUMAN	28S ribosomal protein S17, mitochondrial, MRP-S17, S17mt (Mitochondrial small ribosomal subunit protein uS17m)	MRPS17 RPMS17 HSPC011	2.26599	1.57042	2.16166	1			GOCC, MitoCarta 3.0	1	1
P40926	MDHM_HUMAN	Malate dehydrogenase, mitochondrial, EC 1.1.1.37	MDH2	2.23852	1.99105	2.05263	1			GOCC, MitoCarta 3.0	1
Q86UY8	NT5D3_HUMAN	5'-nucleotidase domain-containing protein 3, EC 3.1.3.- (GRP94-neighboring nucleotidase)	NT5DC3 GNN TU12B1-TY	2.23345	1.55454	1.44611	1			MitoCarta 3.0	1
Q9HA77	SYCM_HUMAN	Probable cysteine--tRNA ligase, mitochondrial, EC 6.1.1.16 (Cysteinyl-tRNA synthetase, CysRS)	CARS2 OK/SW-cl.10	2.22428	1.55965	1.87705	1			GOCC, MitoCarta 3.0	1
Q6DKK2	TTC19_HUMAN	Tetratricopeptide repeat protein 19, mitochondrial, TPR repeat protein 19	TTC19	2.22015	1.88283	2.40566	1			GOCC, MitoCarta 3.0		1
P49748	ACADV_HUMAN	Very long-chain specific acyl-CoA dehydrogenase, mitochondrial, VLCAD, EC 1.3.8.9	ACADVL VLCAD	2.20786	1.85504	1.5228	1			GOCC, MitoCarta 3.0	1	1
P12694	ODBA_HUMAN	2-oxoisovalerate dehydrogenase subunit alpha, mitochondrial, EC 1.2.4.4 (Branched-chain alpha-keto acid dehydrogenase E1 component alpha chain, BCKDE1A, BCKDH E1-alpha)	BCKDHA	2.20767	2.01709	2.06715	1			GOCC, MitoCarta 3.0	1	1
O95299	NDUAA_HUMAN	NADH dehydrogenase [ubiquinone] 1 alpha subcomplex subunit 10, mitochondrial (Complex I-42kD, CI-42kD) (NADH-ubiquinone oxidoreductase 42 kDa subunit)	NDUFA10	2.20379	1.49037	1.59141	1			GOCC, MitoCarta 3.0	1	1
P30038	AL4A1_HUMAN	Delta-1-pyrroline-5-carboxylate dehydrogenase, mitochondrial, P5C dehydrogenase, EC 1.2.1.88 (Aldehyde dehydrogenase family 4 member A1) (L-glutamate gamma-semialdehyde dehydrogenase)	ALDH4A1 ALDH4 P5CDH	2.18882	1.96041	1.92976	1			GOCC, MitoCarta 3.0	1
Q15070	OXA1L_HUMAN	Mitochondrial inner membrane protein OXA1L (Hsa) (OXA1Hs) (Oxidase assembly 1-like protein, OXA1-like protein)	OXA1L	2.17965	1.99493	1.04141	1			GOCC, MitoCarta 3.0	1	1
Q8NI60	COQ8A_HUMAN	Atypical kinase COQ8A, mitochondrial, EC 2.7.-.- (Chaperone activity of bc1 complex-like, Chaperone-ABC1-like) (Coenzyme Q protein 8A) (aarF domain-containing protein kinase 3)	COQ8A ADCK3 CABC1 PP265	2.17231	1.70447	1.8829	1			GOCC, MitoCarta 3.0		1
P13804	ETFA_HUMAN	Electron transfer flavoprotein subunit alpha, mitochondrial, Alpha-ETF	ETFA	2.17187	1.34858	1.84033	1			GOCC, MitoCarta 3.0	1
Q9BYD6	RM01_HUMAN	39S ribosomal protein L1, mitochondrial, L1mt, MRP-L1 (Mitochondrial large ribosomal subunit protein uL1m)	MRPL1 BM-022	2.17162	2.61247	2.22977	1			GOCC, MitoCarta 3.0	1	1
O75208	COQ9_HUMAN	Ubiquinone biosynthesis protein COQ9, mitochondrial	COQ9 C16orf49 HSPC326 PSEC0129	2.17033	1.44232	2.29123	1			GOCC, MitoCarta 3.0		1
Q16795	NDUA9_HUMAN	NADH dehydrogenase [ubiquinone] 1 alpha subcomplex subunit 9, mitochondrial (Complex I-39kD, CI-39kD) (NADH-ubiquinone oxidoreductase 39 kDa subunit)	NDUFA9 NDUFS2L	2.16943	2.33363	2.29179	1			GOCC, MitoCarta 3.0	1	1
O75323	NIPS2_HUMAN	Protein NipSnap homolog 2, NipSnap2 (Glioblastoma-amplified sequence)	NIPSNAP2 GBAS	2.16557	2.33428	1.99699	1			GOCC, MitoCarta 3.0	1		1
P11177	ODPB_HUMAN	Pyruvate dehydrogenase E1 component subunit beta, mitochondrial, PDHE1-B, EC 1.2.4.1	PDHB PHE1B	2.14493	2.25807	2.40989	1			GOCC, MitoCarta 3.0	1
Q8IYB8	SUV3_HUMAN	ATP-dependent RNA helicase SUPV3L1, mitochondrial, EC 3.6.4.13 (Suppressor of var1 3-like protein 1, SUV3-like protein 1)	SUPV3L1 SUV3	2.14444	1.40964	2.01344	1			GOCC, MitoCarta 3.0	1
P22695	QCR2_HUMAN	Cytochrome b-c1 complex subunit 2, mitochondrial (Complex III subunit 2) (Core protein II) (Ubiquinol-cytochrome-c reductase complex core protein 2)	UQCRC2	2.13447	2.54732	2.00744	1			GOCC, MitoCarta 3.0		1
Q99536	VAT1_HUMAN	Synaptic vesicle membrane protein VAT-1 homolog, EC 1.-.-.-	VAT1	2.13252	1.6829	1.62764	1			GOCC			1
Q9H8M1	CQ10B_HUMAN	Coenzyme Q-binding protein COQ10 homolog B, mitochondrial	COQ10B	2.12821	2.57682	1.30929	1			GOCC, MitoCarta 3.0		1
Q9H7Z7	PGES2_HUMAN	Prostaglandin E synthase 2, EC 5.3.99.3 (Membrane-associated prostaglandin E synthase-2, mPGE synthase-2) (Microsomal prostaglandin E synthase 2, mPGES-2) (Prostaglandin-H(2) E-isomerase) [Cleaved into: Prostaglandin E synthase 2 truncated form ]	PTGES2 C9orf15 PGES2	2.11892	1.64989	2.2292	1			GOCC, MitoCarta 3.0		1
O75390	CISY_HUMAN	Citrate synthase, mitochondrial, EC 2.3.3.1 (Citrate (Si)-synthase)	CS	2.10303	2.13848	2.15395	1			GOCC, MitoCarta 3.0	1
Q9NYY8	FAKD2_HUMAN	FAST kinase domain-containing protein 2, mitochondrial	FASTKD2 KIAA0971	2.09818	1.90861	1.78171	1			GOCC, MitoCarta 3.0	1
Q9P032	NDUF4_HUMAN	NADH dehydrogenase [ubiquinone] 1 alpha subcomplex assembly factor 4 (Hormone-regulated proliferation-associated protein of 20 kDa)	NDUFAF4 C6orf66 HRPAP20 HSPC125 My013	2.0941	2.44902	1.35959	1			GOCC, MitoCarta 3.0		1
P82933	RT09_HUMAN	28S ribosomal protein S9, mitochondrial, MRP-S9, S9mt (Mitochondrial small ribosomal subunit protein uS9m)	MRPS9 RPMS9	2.09077	2.04649	1.7937	1			GOCC, MitoCarta 3.0	1	1
Q6P087	RUSD3_HUMAN	Mitochondrial mRNA pseudouridine synthase RPUSD3, EC 5.4.99.- (RNA pseudouridylate synthase domain-containing protein 3)	RPUSD3	2.0864	1.56962	1.8697	1			GOCC, MitoCarta 3.0, PMID: 23371551	1
Q9NX20	RM16_HUMAN	39S ribosomal protein L16, mitochondrial, L16mt, MRP-L16 (Mitochondrial large ribosomal subunit protein uL16m)	MRPL16 PNAS-111	2.08288	2.8105	2.91064	1			GOCC, MitoCarta 3.0	1	1
Q9H9B4	SFXN1_HUMAN	Sideroflexin-1	SFXN1	2.08198	2.56265	2.34029	1			GOCC, MitoCarta 3.0		1
O75648	MTU1_HUMAN	Mitochondrial tRNA-specific 2-thiouridylase 1, EC 2.8.1.14 (MTO2 homolog)	TRMU MTU1 TRMT1	2.07975	1.9582	2.09663	1			GOCC, MitoCarta 3.0	1
P54886	P5CS_HUMAN	Delta-1-pyrroline-5-carboxylate synthase, P5CS (Aldehyde dehydrogenase family 18 member A1) [Includes: Glutamate 5-kinase, GK, EC 2.7.2.11 (Gamma-glutamyl kinase); Gamma-glutamyl phosphate reductase, GPR, EC 1.2.1.41 (Glutamate-5-semialdehyde dehydrogenase) (Glutamyl-gamma-semialdehyde dehydrogenase) ]	ALDH18A1 GSAS P5CS PYCS	2.07693	1.89867	2.30014	1			GOCC, MitoCarta 3.0	1	1
O75616	ERAL1_HUMAN	GTPase Era, mitochondrial, H-ERA, hERA (Conserved ERA-like GTPase, CEGA) (ERA-W) (ERA-like protein 1)	ERAL1 HERA	2.07643	1.86201	2.03165	1			GOCC, MitoCarta 3.0, PubMed: 20604745	1	1
O43615	TIM44_HUMAN	Mitochondrial import inner membrane translocase subunit TIM44	TIMM44 MIMT44 TIM44	2.07384	2.15651	1.50441	1			GOCC, MitoCarta 3.0	1	1
P06493	CDK1_HUMAN	Cyclin-dependent kinase 1, CDK1, EC 2.7.11.22, EC 2.7.11.23 (Cell division control protein 2 homolog) (Cell division protein kinase 1) (p34 protein kinase)	CDK1 CDC2 CDC28A CDKN1 P34CDC2	2.07257	1.86856	1.61882	1			GOCC					1
P36776	LONM_HUMAN	Lon protease homolog, mitochondrial, EC 3.4.21.53 (LONHs) (Lon protease-like protein, LONP) (Mitochondrial ATP-dependent protease Lon) (Serine protease 15)	LONP1 PRSS15	2.07246	1.68955	1.91015	1			GOCC, MitoCarta 3.0	1
Q9BYD2	RM09_HUMAN	39S ribosomal protein L9, mitochondrial, L9mt, MRP-L9 (Mitochondrial large ribosomal subunit protein bL9m)	MRPL9	2.06576	1.62071	1.79287	1			GOCC, MitoCarta 3.0	1	1
O75414	NDK6_HUMAN	Nucleoside diphosphate kinase 6, NDK 6, NDP kinase 6, EC 2.7.4.6 (Inhibitor of p53-induced apoptosis-alpha, IPIA-alpha) (nm23-H6)	NME6	2.0656	2.07848	1.90953	1			GOCC, MitoCarta 3.0	1
Q9BYD3	RM04_HUMAN	39S ribosomal protein L4, mitochondrial, L4mt, MRP-L4 (Mitochondrial large ribosomal subunit protein uL4m)	MRPL4 CDABP0091 CGI-28	2.06192	2.28791	1.75335	1			GOCC, MitoCarta 3.0	1	1
P32322	P5CR1_HUMAN	Pyrroline-5-carboxylate reductase 1, mitochondrial, P5C reductase 1, P5CR 1, EC 1.5.1.2	PYCR1	2.06133	1.32698	1.75394	1			GOCC, MitoCarta 3.0	1
Q02252	MMSA_HUMAN	Methylmalonate-semialdehyde dehydrogenase [acylating], mitochondrial, MMSDH, Malonate-semialdehyde dehydrogenase [acylating], EC 1.2.1.18, EC 1.2.1.27 (Aldehyde dehydrogenase family 6 member A1)	ALDH6A1 MMSDH	2.05999	1.99214	1.81109	1			GOCC, MitoCarta 3.0	1	1
Q6NUK1	SCMC1_HUMAN	Calcium-binding mitochondrial carrier protein SCaMC-1 (Mitochondrial ATP-Mg/Pi carrier protein 1) (Mitochondrial Ca(2+)-dependent solute carrier protein 1) (Small calcium-binding mitochondrial carrier protein 1) (Solute carrier family 25 member 24)	SLC25A24 APC1 MCSC1 SCAMC1	2.05266	1.86005	1.97695	1			GOCC, MitoCarta 3.0		1
Q7Z7H8	RM10_HUMAN	39S ribosomal protein L10, mitochondrial, L10mt, MRP-L10 (39S ribosomal protein L8, mitochondrial, L8mt, MRP-L8) (Mitochondrial large ribosomal subunit protein uL10m)	MRPL10 MRPL8 RPML8	2.04721	2.01677	2.37274	1			GOCC, MitoCarta 3.0	1	1
Q9Y2Z4	SYYM_HUMAN	Tyrosine--tRNA ligase, mitochondrial, EC 6.1.1.1 (Tyrosyl-tRNA synthetase, TyrRS)	YARS2 CGI-04	2.044	2.18499	1.86606	1			GOCC, MitoCarta 3.0	1
Q00059	TFAM_HUMAN	Transcription factor A, mitochondrial, mtTFA (Mitochondrial transcription factor 1, MtTF1) (Transcription factor 6, TCF-6) (Transcription factor 6-like 2)	TFAM TCF6 TCF6L2	2.04205	2.07527	2.18577	1			GOCC, MitoCarta 3.0	1
Q96A35	RM24_HUMAN	39S ribosomal protein L24, mitochondrial, L24mt, MRP-L24 (Mitochondrial large ribosomal subunit protein uL24m)	MRPL24	2.0373	2.04585	2.25544	1			GOCC, MitoCarta 3.0	1	1
O75027	ABCB7_HUMAN	Iron-sulfur clusters transporter ABCB7, mitochondrial (ATP-binding cassette sub-family B member 7, mitochondrial) (ATP-binding cassette transporter 7, ABC transporter 7 protein)	ABCB7 ABC7	2.02925	1.40518	2.1187	1			GOCC, MitoCarta 3.0		1
Q96DB5	RMD1_HUMAN	Regulator of microtubule dynamics protein 1, RMD-1, hRMD-1 (Protein FAM82B)	RMDN1 FAM82B CGI-90	2.02335	2.51517	2.19958	1			MitoCarta 3.0			1
Q9H845	ACAD9_HUMAN	Complex I assembly factor ACAD9, mitochondrial (Acyl-CoA dehydrogenase family member 9, ACAD-9, EC 1.3.8.-)	ACAD9	2.02243	1.28102	1.17827	1			GOCC, MitoCarta 3.0		1
P51398	RT29_HUMAN	28S ribosomal protein S29, mitochondrial, MRP-S29, S29mt (Death-associated protein 3, DAP-3) (Ionizing radiation resistance conferring protein) (Mitochondrial small ribosomal subunit protein mS29)	DAP3 MRPS29	2.01847	2.25583	2.10869	1			GOCC, MitoCarta 3.0	1	1
P82675	RT05_HUMAN	28S ribosomal protein S5, mitochondrial, MRP-S5, S5mt (Mitochondrial small ribosomal subunit protein uS5m)	MRPS5	2.01769	2.11285	1.79308	1			GOCC, MitoCarta 3.0	1	1
Q99757	THIOM_HUMAN	Thioredoxin, mitochondrial, MTRX, Mt-Trx (Thioredoxin-2)	TXN2 TRX2	2.01767	2.55677	2.07716	1			GOCC, MitoCarta 3.0	1
O95571	ETHE1_HUMAN	Persulfide dioxygenase ETHE1, mitochondrial, EC 1.13.11.18 (Ethylmalonic encephalopathy protein 1) (Hepatoma subtracted clone one protein) (Sulfur dioxygenase ETHE1)	ETHE1 HSCO	2.00708	2.19105	2.11509	1			GOCC, MitoCarta 3.0	1
P09622	DLDH_HUMAN	Dihydrolipoyl dehydrogenase, mitochondrial, EC 1.8.1.4 (Dihydrolipoamide dehydrogenase) (Glycine cleavage system L protein)	DLD GCSL LAD PHE3	2.00251	1.75473	1.67259	1			GOCC, MitoCarta 3.0	1
Q15165	PON2_HUMAN	Serum paraoxonase/arylesterase 2, PON 2, EC 3.1.1.2, EC 3.1.1.81 (Aromatic esterase 2, A-esterase 2) (Serum aryldialkylphosphatase 2)	PON2	1.99728	2.38178	1.974	1			GOCC					1
Q96EY7	PTCD3_HUMAN	Pentatricopeptide repeat domain-containing protein 3, mitochondrial (28S ribosomal protein S39, mitochondrial, MRP-S39) (Mitochondrial small ribosomal subunit protein mS39) (Transformation-related gene 15 protein, TRG-15)	PTCD3 MRPS39 TRG15	1.99527	1.4295	1.37911	1			GOCC, MitoCarta 3.0	1	1
Q9NRK6	ABCBA_HUMAN	ATP-binding cassette sub-family B member 10, mitochondrial (ABC-mitochondrial erythroid protein, ABC-me protein) (ATP-binding cassette transporter 10, ABC transporter 10 protein) (Mitochondrial ATP-binding cassette 2, M-ABC2)	ABCB10	1.99312	2.29295	2.48881	1			GOCC, MitoCarta 3.0		1
P10109	ADX_HUMAN	Adrenodoxin, mitochondrial (Adrenal ferredoxin) (Ferredoxin-1) (Hepatoredoxin)	FDX1 ADX	1.98665	2.61869	2.53859	1			GOCC, MitoCarta 3.0	1
Q9Y6N5	SQOR_HUMAN	Sulfide:quinone oxidoreductase, mitochondrial, SQOR, EC 1.8.5.8 (Sulfide dehydrogenase-like) (Sulfide quinone oxidoreductase)	SQOR SQRDL CGI-44	1.98274	1.97489	2.07319	1			GOCC, MitoCarta 3.0		1
O95202	LETM1_HUMAN	Mitochondrial proton/calcium exchanger protein (Leucine zipper-EF-hand-containing transmembrane protein 1)	LETM1	1.97733	1.64588	1.63462	1			GOCC, MitoCarta 3.0		1
Q9H2W6	RM46_HUMAN	39S ribosomal protein L46, mitochondrial, L46mt, MRP-L46 (Mitochondrial large ribosomal subunit protein mL46) (P2ECSL)	MRPL46 C15orf4 LIECG2	1.97613	2.40727	1.84943	1			GOCC, MitoCarta 3.0	1	1
P56134	ATPK_HUMAN	ATP synthase subunit f, mitochondrial (ATP synthase membrane subunit f)	ATP5MF ATP5J2 ATP5JL	1.96405	1.8499	1.71761	1			GOCC, MitoCarta 3.0		1
P49406	RM19_HUMAN	39S ribosomal protein L19, mitochondrial, L19mt, MRP-L19 (39S ribosomal protein L15, mitochondrial, L15mt, MRP-L15) (Mitochondrial large ribosomal subunit protein bL19m)	MRPL19 KIAA0104 MRPL15	1.96312	1.94758	1.97403	1			GOCC, MitoCarta 3.0	1	1
Q9GZT3	SLIRP_HUMAN	SRA stem-loop-interacting RNA-binding protein, mitochondrial	SLIRP C14orf156 DC23 DC50 PD04872	1.96207	1.88845	1.49201	1			GOCC, MitoCarta 3.0	1
Q9UBQ7	GRHPR_HUMAN	Glyoxylate reductase/hydroxypyruvate reductase, EC 1.1.1.79, EC 1.1.1.81	GRHPR GLXR MSTP035	1.95129	1.02414	1.22143	1			MitoCarta 3.0	1
Q96C36	P5CR2_HUMAN	Pyrroline-5-carboxylate reductase 2, P5C reductase 2, P5CR 2, EC 1.5.1.2	PYCR2	1.94863	1.22978	1.17252	1			GOCC, MitoCarta 3.0	1
Q9Y2S7	PDIP2_HUMAN	Polymerase delta-interacting protein 2 (38 kDa DNA polymerase delta interaction protein, p38)	POLDIP2 PDIP38 POLD4 HSPC017	1.94643	2.09175	1.86147	1			GOCC, MitoCarta 3.0	1
Q7Z4W1	DCXR_HUMAN	L-xylulose reductase, XR, EC 1.1.1.10 (Carbonyl reductase II) (Dicarbonyl/L-xylulose reductase) (Kidney dicarbonyl reductase, kiDCR) (Short chain dehydrogenase/reductase family 20C member 1) (Sperm surface protein P34H)	DCXR SDR20C1	1.93296	1.60254	1.5697	1			MitoCarta 3.0	1
Q9BRJ2	RM45_HUMAN	39S ribosomal protein L45, mitochondrial, L45mt, MRP-L45 (Mitochondrial large ribosomal subunit protein mL45)	MRPL45	1.92354	2.33205	2.08526	1			GOCC		1
P52815	RM12_HUMAN	39S ribosomal protein L12, mitochondrial, L12mt, MRP-L12 (5c5-2) (Mitochondrial large ribosomal subunit protein bL12m)	MRPL12 MRPL7 RPML12	1.91692	1.89443	1.87138	1			GOCC, MitoCarta 3.0	1	1
O75439	MPPB_HUMAN	Mitochondrial-processing peptidase subunit beta, EC 3.4.24.64 (Beta-MPP) (P-52)	PMPCB MPPB	1.89274	1.74258	1.97304	1			GOCC, MitoCarta 3.0	1	1
Q9NPE2	NGRN_HUMAN	Neugrin (Mesenchymal stem cell protein DSC92) (Neurite outgrowth-associated protein) (Spinal cord-derived protein FI58G)	NGRN FI58G HT020	1.8784	1.92778	1.80346	1			GOCC, MitoCarta 3.0	1
Q9NX63	MIC19_HUMAN	MICOS complex subunit MIC19 (Coiled-coil-helix-coiled-coil-helix domain-containing protein 3)	CHCHD3 MIC19 MINOS3	1.87504	2.27519	2.49243	1			GOCC, MitoCarta 3.0		1
Q6UB35	C1TM_HUMAN	Monofunctional C1-tetrahydrofolate synthase, mitochondrial, EC 6.3.4.3 (Formyltetrahydrofolate synthetase)	MTHFD1L FTHFSDC1	1.86623	1.52139	1.18385	1			GOCC, MitoCarta 3.0	1
Q96AB3	ISOC2_HUMAN	Isochorismatase domain-containing protein 2	ISOC2	1.86127	1.98934	2.50391	1			MitoCarta 3.0	1
P19367	HXK1_HUMAN	Hexokinase-1, EC 2.7.1.1 (Brain form hexokinase) (Hexokinase type I, HK I) (Hexokinase-A)	HK1	1.85275	1.63983	1.99471	1			GOCC			1
Q8N3Z3	GTPB8_HUMAN	GTP-binding protein 8	GTPBP8	1.85123	1.63746	1.68742	1			GOCC					1
Q99623	PHB2_HUMAN	Prohibitin-2 (B-cell receptor-associated protein BAP37) (D-prohibitin) (Repressor of estrogen receptor activity)	PHB2 BAP REA	1.84866	1.8789	1.7703	1			GOCC, MitoCarta 3.0		1	1
Q15526	SURF1_HUMAN	Surfeit locus protein 1	SURF1 SURF-1	1.84533	1.54154	1.82167	1			GOCC, MitoCarta 3.0		1
Q9H2D1	MFTC_HUMAN	Mitochondrial folate transporter/carrier (Solute carrier family 25 member 32)	SLC25A32 MFT MFTC	1.84056	1.53785	1.40269	1			GOCC, MitoCarta 3.0		1
Q96HP4	OXND1_HUMAN	Oxidoreductase NAD-binding domain-containing protein 1, EC 1.-.-.-	OXNAD1	1.83744	1.14516	1.22715	1			MitoCarta 3.0	1
P15848	ARSB_HUMAN	Arylsulfatase B, ASB, EC 3.1.6.12 (N-acetylgalactosamine-4-sulfatase, G4S)	ARSB	1.83367	1.8611	1.72153	1			GOCC					1
Q96IR7	HPDL_HUMAN	4-hydroxyphenylpyruvate dioxygenase-like protein, HPD-like protein, EC 1.13.-.- (Glyoxalase domain-containing protein 1)	HPDL GLOXD1	1.83195	1.87637	1.3466	1			GOCC, MitoCarta 3.0					1
Q9NVI7	ATD3A_HUMAN	ATPase family AAA domain-containing protein 3A	ATAD3A	1.82771	1.96145	2.06745	1			GOCC, MitoCarta 3.0		1
Q10713	MPPA_HUMAN	Mitochondrial-processing peptidase subunit alpha (Alpha-MPP) (Inactive zinc metalloprotease alpha) (P-55)	PMPCA INPP5E KIAA0123 MPPA	1.82732	1.33639	1.85956	1			GOCC, MitoCarta 3.0	1	1
Q6NVY1	HIBCH_HUMAN	3-hydroxyisobutyryl-CoA hydrolase, mitochondrial, EC 3.1.2.4 (3-hydroxyisobutyryl-coenzyme A hydrolase, HIB-CoA hydrolase, HIBYL-CoA-H)	HIBCH	1.82525	1.67548	1.90055	1			GOCC, MitoCarta 3.0	1
Q96EL3	RM53_HUMAN	39S ribosomal protein L53, mitochondrial, L53mt, MRP-L53 (Mitochondrial large ribosomal subunit protein mL53)	MRPL53	1.82297	1.9138	1.86541	1			GOCC, MitoCarta 3.0	1	1
Q8NE86	MCU_HUMAN	Calcium uniporter protein, mitochondrial, HsMCU (Coiled-coil domain-containing protein 109A)	MCU C10orf42 CCDC109A	1.81911	1.63667	2.0123	1			GOCC, MitoCarta 3.0		1
P36542	ATPG_HUMAN	ATP synthase subunit gamma, mitochondrial (ATP synthase F1 subunit gamma) (F-ATPase gamma subunit)	ATP5F1C ATP5C ATP5C1 ATP5CL1	1.81411	1.86706	1.22933	1			GOCC, MitoCarta 3.0	1	1
Q7L592	NDUF7_HUMAN	Protein arginine methyltransferase NDUFAF7, mitochondrial, EC 2.1.1.320 (NADH dehydrogenase [ubiquinone] complex I, assembly factor 7) (Protein midA homolog)	NDUFAF7 C2orf56 PRO1853	1.81103	1.89762	1.84249	1			GOCC, MitoCarta 3.0	1	1
P10606	COX5B_HUMAN	Cytochrome c oxidase subunit 5B, mitochondrial (Cytochrome c oxidase polypeptide Vb)	COX5B	1.81043	1.36435	1.39082	1			GOCC, MitoCarta 3.0		1
Q6PI48	SYDM_HUMAN	Aspartate--tRNA ligase, mitochondrial, EC 6.1.1.12 (Aspartyl-tRNA synthetase, AspRS)	DARS2	1.80937	1.8517	2.10341	1			GOCC, MitoCarta 3.0	1
Q8IVS2	FABD_HUMAN	Malonyl-CoA-acyl carrier protein transacylase, mitochondrial, MCT, EC 2.3.1.39 (Mitochondrial malonyl CoA:ACP acyltransferase) (Mitochondrial malonyltransferase) ([Acyl-carrier-protein] malonyltransferase)	MCAT MT	1.80495	1.49774	1.60496	1			GOCC, MitoCarta 3.0	1
P49411	EFTU_HUMAN	Elongation factor Tu, mitochondrial, EF-Tu (P43)	TUFM	1.80427	1.50812	1.68364	1			GOCC, MitoCarta 3.0	1
Q9UFN0	NPS3A_HUMAN	Protein NipSnap homolog 3A, NipSnap3A (Protein NipSnap homolog 4, NipSnap4) (Target for Salmonella secreted protein C, TassC)	NIPSNAP3A NIPSNAP4 HSPC299	1.80306	2.77059	2.62824	1			GOCC, MitoCarta 3.0	1
P12235	ADT1_HUMAN	ADP/ATP translocase 1 (ADP,ATP carrier protein 1) (ADP,ATP carrier protein, heart/skeletal muscle isoform T1) (Adenine nucleotide translocator 1, ANT 1) (Solute carrier family 25 member 4)	SLC25A4 AAC1 ANT1	1.79698	1.84058	1.96857	1			GOCC, MitoCarta 3.0		1
P53597	SUCA_HUMAN	Succinate--CoA ligase [ADP/GDP-forming] subunit alpha, mitochondrial, EC 6.2.1.4, EC 6.2.1.5 (Succinyl-CoA synthetase subunit alpha, SCS-alpha)	SUCLG1	1.79673	1.64289	1.53932	1			GOCC, MitoCarta 3.0	1
P17568	NDUB7_HUMAN	NADH dehydrogenase [ubiquinone] 1 beta subcomplex subunit 7 (Cell adhesion protein SQM1) (Complex I-B18, CI-B18) (NADH-ubiquinone oxidoreductase B18 subunit)	NDUFB7	1.79652	1.99951	1.08928	1			GOCC, MitoCarta 3.0		1		1
Q96CM3	RUSD4_HUMAN	Pseudouridylate synthase RPUSD4, mitochondrial, EC 5.4.99.- (RNA pseudouridylate synthase domain-containing protein 4)	RPUSD4	1.79326	1.84747	1.59412	1			GOCC, MitoCarta 3.0	1
P25325	THTM_HUMAN	3-mercaptopyruvate sulfurtransferase, MST, EC 2.8.1.2	MPST TST2	1.79143	2.21396	2.04513	1			GOCC, MitoCarta 3.0	1	1
O95900	TRUB2_HUMAN	Pseudouridylate synthase TRUB2, mitochondrial, EC 5.4.99.- (TruB pseudouridine synthase homolog 2) (tRNA pseudouridine 55 synthase TRUB2, Psi55 synthase TRUB2, EC 5.4.99.25)	TRUB2	1.79138	2.21489	1.69735	1			GOCC, MitoCarta 3.0	1
O75489	NDUS3_HUMAN	NADH dehydrogenase [ubiquinone] iron-sulfur protein 3, mitochondrial, EC 7.1.1.2 (Complex I-30kD, CI-30kD) (NADH-ubiquinone oxidoreductase 30 kDa subunit)	NDUFS3	1.77849	2.11189	1.64793	1			GOCC, MitoCarta 3.0	1	1
Q7L0Y3	TM10C_HUMAN	tRNA methyltransferase 10 homolog C (HBV pre-S2 trans-regulated protein 2) (Mitochondrial ribonuclease P protein 1, Mitochondrial RNase P protein 1) (RNA (guanine-9-)-methyltransferase domain-containing protein 1) (Renal carcinoma antigen NY-REN-49) (mRNA methyladenosine-N(1)-methyltransferase, EC 2.1.1.-) (tRNA (adenine(9)-N(1))-methyltransferase, EC 2.1.1.218) (tRNA (guanine(9)-N(1))-methyltran…	TRMT10C MRPP1 RG9MTD1	1.77747	1.73337	1.75741	1			GOCC, MitoCarta 3.0	1
Q14197	ICT1_HUMAN	Peptidyl-tRNA hydrolase ICT1, mitochondrial, EC 3.1.1.29 (39S ribosomal protein L58, mitochondrial, MRP-L58) (Digestion substraction 1, DS-1) (Immature colon carcinoma transcript 1 protein) (Mitochondrial large ribosomal subunit protein mL62)	MRPL58 DS1 ICT1	1.77277	1.8417	1.33423	1			GOCC, MitoCarta 3.0	1	1
A8MXV4	NUD19_HUMAN	Acyl-coenzyme A diphosphatase NUDT19, EC 3.6.1.- (Nucleoside diphosphate-linked moiety X motif 19, Nudix motif 19)	NUDT19	1.77238	1.41221	1.24409	1			MitoCarta 3.0	1
P50336	PPOX_HUMAN	Protoporphyrinogen oxidase, PPO, EC 1.3.3.4	PPOX	1.75763	1.72027	1.50734	1			GOCC, MitoCarta 3.0		1		1
Q9H5Q4	TFB2M_HUMAN	Dimethyladenosine transferase 2, mitochondrial, EC 2.1.1.- (Hepatitis C virus NS5A-transactivated protein 5, HCV NS5A-transactivated protein 5) (Mitochondrial 12S rRNA dimethylase 2) (Mitochondrial transcription factor B2, h-mtTFB, h-mtTFB2, hTFB2M, mtTFB2) (S-adenosylmethionine-6-N', N'-adenosyl(rRNA) dimethyltransferase 2)	TFB2M NS5ATP5	1.75479	1.41867	1.71778	1			GOCC, MitoCarta 3.0	1
O95139	NDUB6_HUMAN	NADH dehydrogenase [ubiquinone] 1 beta subcomplex subunit 6 (Complex I-B17, CI-B17) (NADH-ubiquinone oxidoreductase B17 subunit)	NDUFB6	1.74813	1.70072	1.20478	1			GOCC, MitoCarta 3.0		1
Q5T440	CAF17_HUMAN	Putative transferase CAF17, mitochondrial, EC 2.1.-.- (Iron-sulfur cluster assembly factor homolog)	IBA57 C1orf69	1.74686	2.06656	2.11991	1			GOCC, MitoCarta 3.0	1
Q96ER9	MITOK_HUMAN	Mitochondrial potassium channel, MITOK (Coiled-coil domain-containing protein 51)	CCDC51 MITOK	1.74525	1.66181	1.14279	1			GOCC, MitoCarta 3.0		1
O15091	MRPP3_HUMAN	Mitochondrial ribonuclease P catalytic subunit, EC 3.1.26.5 (Mitochondrial ribonuclease P protein 3, Mitochondrial RNase P protein 3) (Protein only RNase P catalytic subunit)	PRORP KIAA0391 MRPP3	1.74356	1.20899	1.39508	1			GOCC, MitoCarta 3.0	1
Q8NCN5	PDPR_HUMAN	Pyruvate dehydrogenase phosphatase regulatory subunit, mitochondrial, PDPr	PDPR KIAA1990	1.72813	1.60525	1.63615	1			GOCC, MitoCarta 3.0	1
O75306	NDUS2_HUMAN	NADH dehydrogenase [ubiquinone] iron-sulfur protein 2, mitochondrial, EC 7.1.1.2 (Complex I-49kD, CI-49kD) (NADH-ubiquinone oxidoreductase 49 kDa subunit)	NDUFS2	1.70838	1.37448	1.60917	1			GOCC, MitoCarta 3.0	1	1
Q13232	NDK3_HUMAN	Nucleoside diphosphate kinase 3, NDK 3, NDP kinase 3, EC 2.7.4.6 (DR-nm23) (Nucleoside diphosphate kinase C, NDPKC) (nm23-H3)	NME3	1.70676	1.71993	1.78739	1			MitoCarta 3.0			1
O14925	TIM23_HUMAN	Mitochondrial import inner membrane translocase subunit Tim23	TIMM23 TIM23	1.6985	1.62528	2.21703	1			GOCC, MitoCarta 3.0		1		1
A3KMH1	VWA8_HUMAN	von Willebrand factor A domain-containing protein 8 (PEX7-binding protein 2, P7BP2)	VWA8 KIAA0564	1.69425	1.50533	1.72933	1			GOCC, MitoCarta 3.0	1
Q16822	PCKGM_HUMAN	Phosphoenolpyruvate carboxykinase [GTP], mitochondrial, PEPCK-M, EC 4.1.1.32	PCK2 PEPCK2	1.68627	1.50335	1.56341	1			GOCC, MitoCarta 3.0	1
Q9UJZ1	STML2_HUMAN	Stomatin-like protein 2, mitochondrial, SLP-2 (EPB72-like protein 2) (Paraprotein target 7, Paratarg-7)	STOML2 SLP2 HSPC108	1.6853	1.7194	1.82058	1			GOCC, MitoCarta 3.0		1		1
Q9Y305	ACOT9_HUMAN	Acyl-coenzyme A thioesterase 9, mitochondrial, Acyl-CoA thioesterase 9, EC 3.1.2.- (Acyl-CoA thioester hydrolase 9)	ACOT9 CGI-16	1.68391	1.53556	2.33417	1			GOCC, MitoCarta 3.0	1	1
P40939	ECHA_HUMAN	Trifunctional enzyme subunit alpha, mitochondrial (78 kDa gastrin-binding protein) (Monolysocardiolipin acyltransferase, EC 2.3.1.-) (TP-alpha) [Includes: Long-chain enoyl-CoA hydratase, EC 4.2.1.17; Long chain 3-hydroxyacyl-CoA dehydrogenase, EC 1.1.1.211 ]	HADHA HADH	1.68076	1.26136	1.51392	1			GOCC, MitoCarta 3.0		1
Q9BU61	NDUF3_HUMAN	NADH dehydrogenase [ubiquinone] 1 alpha subcomplex assembly factor 3	NDUFAF3 C3orf60	1.67591	1.9599	1.92361	1			GOCC, MitoCarta 3.0		1
Q9NWU5	RM22_HUMAN	39S ribosomal protein L22, mitochondrial, L22mt, MRP-L22 (39S ribosomal protein L25, mitochondrial, L25mt, MRP-L25) (Mitochondrial large ribosomal subunit protein uL22m)	MRPL22 MRPL25 RPML25 HSPC158	1.67301	1.84205	2.29456	1			GOCC, MitoCarta 3.0	1	1
Q9H4K7	MTG2_HUMAN	Mitochondrial ribosome-associated GTPase 2 (GTP-binding protein 5) (Protein obg homolog 1, ObgH1)	MTG2 GTPBP5 OBGH1	1.67257	1.3741	2.40162	1			GOCC, MitoCarta 3.0	1	1
P42126	ECI1_HUMAN	Enoyl-CoA delta isomerase 1, mitochondrial, EC 5.3.3.8 (3,2-trans-enoyl-CoA isomerase) (Delta(3),Delta(2)-enoyl-CoA isomerase, D3,D2-enoyl-CoA isomerase) (Dodecenoyl-CoA isomerase)	ECI1 DCI	1.66383	1.74544	1.46325	1			GOCC, MitoCarta 3.0	1
O15382	BCAT2_HUMAN	Branched-chain-amino-acid aminotransferase, mitochondrial, BCAT(m), EC 2.6.1.42 (Placental protein 18, PP18)	BCAT2 BCATM BCT2 ECA40	1.65467	1.19998	1.76667	1			GOCC, MitoCarta 3.0	1
P55809	SCOT1_HUMAN	Succinyl-CoA:3-ketoacid coenzyme A transferase 1, mitochondrial, SCOT, EC 2.8.3.5 (3-oxoacid CoA-transferase 1) (Somatic-type succinyl-CoA:3-oxoacid CoA-transferase, SCOT-s) (Succinyl-CoA:3-oxoacid CoA transferase)	OXCT1 OXCT SCOT	1.6519	1.22488	1.41275	1			GOCC, MitoCarta 3.0	1
Q969S9	RRF2M_HUMAN	Ribosome-releasing factor 2, mitochondrial, RRF2mt (Elongation factor G 2, mitochondrial, EF-G2mt, mEF-G 2) (Elongation factor G2, hEFG2)	GFM2 EFG2 MSTP027	1.65141	1.24239	1.3015	1			GOCC, MitoCarta 3.0	1
P48047	ATPO_HUMAN	ATP synthase subunit O, mitochondrial (ATP synthase peripheral stalk subunit OSCP) (Oligomycin sensitivity conferral protein, OSCP)	ATP5PO ATP5O ATPO	1.65088	1.8246	1.32318	1			GOCC, MitoCarta 3.0		1
O75127	PTCD1_HUMAN	Pentatricopeptide repeat-containing protein 1, mitochondrial	PTCD1 KIAA0632	1.64761	1.38309	1.50448	1			GOCC, MitoCarta 3.0	1
O96000	NDUBA_HUMAN	NADH dehydrogenase [ubiquinone] 1 beta subcomplex subunit 10 (Complex I-PDSW, CI-PDSW) (NADH-ubiquinone oxidoreductase PDSW subunit)	NDUFB10	1.6466	1.96659	2.49852	1			GOCC, MitoCarta 3.0		1
Q9BPW8	NIPS1_HUMAN	Protein NipSnap homolog 1, NipSnap1	NIPSNAP1	1.64021	2.05211	1.78846	1			GOCC, MitoCarta 3.0	1
P04181	OAT_HUMAN	Ornithine aminotransferase, mitochondrial, EC 2.6.1.13 (Ornithine delta-aminotransferase) (Ornithine--oxo-acid aminotransferase) [Cleaved into: Ornithine aminotransferase, hepatic form; Ornithine aminotransferase, renal form ]	OAT	1.6328	1.43829	1.6095	1			GOCC, MitoCarta 3.0	1
P55084	ECHB_HUMAN	Trifunctional enzyme subunit beta, mitochondrial (TP-beta) [Includes: 3-ketoacyl-CoA thiolase, EC 2.3.1.155, EC 2.3.1.16 (Acetyl-CoA acyltransferase) (Beta-ketothiolase) ]	HADHB MSTP029	1.62611	1.52944	1.28973	1			GOCC, MitoCarta 3.0		1	1
Q86YH6	DLP1_HUMAN	All trans-polyprenyl-diphosphate synthase PDSS2 (All-trans-decaprenyl-diphosphate synthase subunit 2, EC 2.5.1.91) (Candidate tumor suppressor protein) (Decaprenyl pyrophosphate synthase subunit 2) (Decaprenyl-diphosphate synthase subunit 2) (Solanesyl-diphosphate synthase subunit 2)	PDSS2 C6orf210 DLP1	1.62356	1.63584	1.24868	1			GOCC, MitoCarta 3.0	1	1
Q8N983	RM43_HUMAN	39S ribosomal protein L43, mitochondrial, L43mt, MRP-L43 (Mitochondrial large ribosomal subunit protein mL43) (Mitochondrial ribosomal protein bMRP36a)	MRPL43	1.6209	1.73516	1.13867	1			GOCC, MitoCarta 3.0	1	1
Q9P0J1	PDP1_HUMAN	[Pyruvate dehydrogenase [acetyl-transferring]]-phosphatase 1, mitochondrial, PDP 1, EC 3.1.3.43 (Protein phosphatase 2C) (Pyruvate dehydrogenase phosphatase catalytic subunit 1, PDPC 1)	PDP1 PDP PPM2C	1.61995	1.51755	1.71743	1			GOCC, MitoCarta 3.0	1	1
Q9NX46	ADPRS_HUMAN	ADP-ribosylhydrolase ARH3 (ADP-ribose glycohydrolase ARH3) (ADP-ribosylhydrolase 3) (O-acetyl-ADP-ribose deacetylase ARH3, EC 3.5.1.-) (Poly(ADP-ribose) glycohydrolase ARH3, EC 3.2.1.143) ([Protein ADP-ribosylarginine] hydrolase-like protein 2) ([Protein ADP-ribosylserine] hydrolase, EC 3.2.2.-)	ADPRS ADPRHL2 ARH3	1.61882	1.67831	1.37285	1			GOCC	1
P05141	ADT2_HUMAN	ADP/ATP translocase 2 (ADP,ATP carrier protein 2) (ADP,ATP carrier protein, fibroblast isoform) (Adenine nucleotide translocator 2, ANT 2) (Solute carrier family 25 member 5) [Cleaved into: ADP/ATP translocase 2, N-terminally processed ]	SLC25A5 AAC2 ANT2	1.61674	1.43373	1.66325	1			GOCC, MitoCarta 3.0		1
O60313	OPA1_HUMAN	Dynamin-like 120 kDa protein, mitochondrial, EC 3.6.5.5 (Optic atrophy protein 1) [Cleaved into: Dynamin-like 120 kDa protein, form S1 ]	OPA1 KIAA0567	1.61563	1.27399	1.65928	1			GOCC, MitoCarta 3.0		1	1	1
Q13423	NNTM_HUMAN	NAD(P) transhydrogenase, mitochondrial, EC 7.1.1.1 (Nicotinamide nucleotide transhydrogenase) (Pyridine nucleotide transhydrogenase)	NNT	1.61016	1.34292	1.56798	1			GOCC, MitoCarta 3.0		1
P46199	IF2M_HUMAN	Translation initiation factor IF-2, mitochondrial, IF-2(Mt), IF-2Mt, IF2(mt)	MTIF2	1.60241	1.30896	1.36343	1			GOCC, MitoCarta 3.0	1
Q5JTZ9	SYAM_HUMAN	Alanine--tRNA ligase, mitochondrial, EC 6.1.1.7 (Alanyl-tRNA synthetase, AlaRS)	AARS2 AARSL KIAA1270	1.59692	1.20903	1.64579	1			GOCC, MitoCarta 3.0	1
Q92506	DHB8_HUMAN	(3R)-3-hydroxyacyl-CoA dehydrogenase, EC 1.1.1.n12 (17-beta-hydroxysteroid dehydrogenase 8, 17-beta-HSD 8, HSD17B8) (3-ketoacyl-[acyl-carrier-protein] reductase alpha subunit, KAR alpha subunit) (3-oxoacyl-[acyl-carrier-protein] reductase) (Estradiol 17-beta-dehydrogenase 8, EC 1.1.1.62) (Protein Ke6, Ke6) (Short chain dehydrogenase/reductase family 30C member 1) (Testosterone 17-beta-dehydrogena…	HSD17B8 FABGL HKE6 RING2 SDR30C1	1.59447	1.63331	1.66122	1			GOCC, MitoCarta 3.0	1
Q8TB36	GDAP1_HUMAN	Ganglioside-induced differentiation-associated protein 1, GDAP1	GDAP1	1.59255	1.89568	1.66488	1			GOCC, MitoCarta 3.0			1
O94925	GLSK_HUMAN	Glutaminase kidney isoform, mitochondrial, GLS, EC 3.5.1.2 (K-glutaminase) (L-glutamine amidohydrolase) [Cleaved into: Glutaminase kidney isoform, mitochondrial 68 kDa chain; Glutaminase kidney isoform, mitochondrial 65 kDa chain ]	GLS GLS1 KIAA0838	1.59213	1.33362	1.43134	1			GOCC, MitoCarta 3.0	1	1
O14874	BCKD_HUMAN	[3-methyl-2-oxobutanoate dehydrogenase [lipoamide]] kinase, mitochondrial, EC 2.7.11.4 (Branched-chain alpha-ketoacid dehydrogenase kinase, BCKD-kinase, BCKDHKIN)	BCKDK	1.58937	1.20343	1.56522	1			GOCC, MitoCarta 3.0	1
Q8N5N7	RM50_HUMAN	39S ribosomal protein L50, mitochondrial, L50mt, MRP-L50 (Mitochondrial large ribosomal subunit protein mL50)	MRPL50	1.57826	2.20535	1.48622	1			GOCC, MitoCarta 3.0	1	1
P16435	NCPR_HUMAN	NADPH--cytochrome P450 reductase, CPR, P450R, EC 1.6.2.4	POR CYPOR	1.57819	1.13666	1.20817	1			GOCC					1
Q9HC21	TPC_HUMAN	Mitochondrial thiamine pyrophosphate carrier (Mitochondrial uncoupling protein 1) (Solute carrier family 25 member 19)	SLC25A19 DNC MUP1	1.57175	1.53785	1.42281	1			GOCC, MitoCarta 3.0		1
Q9H078	CLPB_HUMAN	Caseinolytic peptidase B protein homolog, EC 3.6.1.- (Suppressor of potassium transport defect 3)	CLPB HSP78 SKD3	1.56176	1.6431	1.21664	1			GOCC, MitoCarta 3.0				1
Q16134	ETFD_HUMAN	Electron transfer flavoprotein-ubiquinone oxidoreductase, mitochondrial, ETF-QO, ETF-ubiquinone oxidoreductase, EC 1.5.5.1 (Electron-transferring-flavoprotein dehydrogenase, ETF dehydrogenase)	ETFDH	1.55899	1.76315	1.5244	1			GOCC, MitoCarta 3.0	1	1
Q99798	ACON_HUMAN	Aconitate hydratase, mitochondrial, Aconitase, EC 4.2.1.3 (Citrate hydro-lyase)	ACO2	1.55605	1.60829	1.97093	1			GOCC, MitoCarta 3.0	1
P38646	GRP75_HUMAN	Stress-70 protein, mitochondrial (75 kDa glucose-regulated protein, GRP-75) (Heat shock 70 kDa protein 9) (Mortalin, MOT) (Peptide-binding protein 74, PBP74)	HSPA9 GRP75 HSPA9B mt-HSP70	1.55462	1.71613	1.59353	1			GOCC, MitoCarta 3.0	1
Q16774	KGUA_HUMAN	Guanylate kinase, EC 2.7.4.8 (GMP kinase) (Guanylate kinase 1)	GUK1 GMK GMPK	1.55302	1.57857	1.08658	1			MitoCarta 3.0	1
O00264	PGRC1_HUMAN	Membrane-associated progesterone receptor component 1, mPR (Dap1) (IZA)	PGRMC1 HPR6.6 PGRMC	1.55287	2.02127	1.99767	1			GOCC			1
Q9H2U2	IPYR2_HUMAN	Inorganic pyrophosphatase 2, mitochondrial, EC 3.6.1.1 (Pyrophosphatase SID6-306) (Pyrophosphate phospho-hydrolase 2, PPase 2)	PPA2 HSPC124	1.55024	1.45064	1.69939	1			GOCC, MitoCarta 3.0	1
Q15031	SYLM_HUMAN	Leucine--tRNA ligase, mitochondrial, EC 6.1.1.4 (Leucyl-tRNA synthetase, LeuRS)	LARS2 KIAA0028	1.54954	1.45322	1.75065	1			GOCC, MitoCarta 3.0	1
Q9H9P8	L2HDH_HUMAN	L-2-hydroxyglutarate dehydrogenase, mitochondrial, EC 1.1.99.2 (Duranin)	L2HGDH C14orf160	1.54772	1.43809	1.65909	1			GOCC, MitoCarta 3.0		1
Q8NBU5	ATAD1_HUMAN	Outer mitochondrial transmembrane helix translocase, EC 7.4.2.- (ATPase family AAA domain-containing protein 1, hATAD1) (Thorase)	ATAD1 FNP001	1.54748	1.51132	2.41081	1			GOCC, MitoCarta 3.0			1
Q9BQ95	ECSIT_HUMAN	Evolutionarily conserved signaling intermediate in Toll pathway, mitochondrial (Protein SITPEC)	ECSIT	1.54316	2.37191	2.27254	1			GOCC, MitoCarta 3.0		1
Q9BW92	SYTM_HUMAN	Threonine--tRNA ligase, mitochondrial, EC 6.1.1.3 (Threonyl-tRNA synthetase, ThrRS) (Threonyl-tRNA synthetase-like 1)	TARS2 TARSL1	1.54211	1.21421	1.59763	1			GOCC, MitoCarta 3.0	1
P30084	ECHM_HUMAN	Enoyl-CoA hydratase, mitochondrial, mECH, mECH1, EC 4.2.1.17, EC 5.3.3.8 (Enoyl-CoA hydratase 1, ECHS1) (Short-chain enoyl-CoA hydratase, SCEH)	ECHS1	1.54142	1.44834	1.4484	1			GOCC, MitoCarta 3.0	1
Q9BSH4	TACO1_HUMAN	Translational activator of cytochrome c oxidase 1 (Coiled-coil domain-containing protein 44) (Translational activator of mitochondrially-encoded cytochrome c oxidase I)	TACO1 CCDC44 PRO0477	1.54035	1.35192	1.16648	1			GOCC, MitoCarta 3.0	1
P32189	GLPK_HUMAN	Glycerol kinase, GK, Glycerokinase, EC 2.7.1.30 (ATP:glycerol 3-phosphotransferase)	GK	1.53478	1.76909	1.23981	1			GOCC			1
Q16762	THTR_HUMAN	Thiosulfate sulfurtransferase, EC 2.8.1.1 (Rhodanese)	TST	1.52975	1.3394	2.04204	1			GOCC, MitoCarta 3.0	1
Q13637	RAB32_HUMAN	Ras-related protein Rab-32	RAB32	1.52617	2.13292	1.50041	1			GOCC			1
Q9BZE1	RM37_HUMAN	39S ribosomal protein L37, mitochondrial, L37mt, MRP-L37 (39S ribosomal protein L2, mitochondrial, L2mt, MRP-L2) (Mitochondrial large ribosomal subunit protein mL37)	MRPL37 MRPL2 RPML2 HSPC235	1.51945	1.68158	2.04382	1			GOCC, MitoCarta 3.0	1	1
Q9H0U6	RM18_HUMAN	39S ribosomal protein L18, mitochondrial, L18mt, MRP-L18 (Mitochondrial large ribosomal subunit protein uL18m)	MRPL18 HSPC071	1.51598	1.55041	2.05727	1			GOCC, MitoCarta 3.0	1	1
Q02978	M2OM_HUMAN	Mitochondrial 2-oxoglutarate/malate carrier protein, OGCP (Solute carrier family 25 member 11)	SLC25A11 SLC20A4	1.5142	1.42583	1.63425	1			GOCC, MitoCarta 3.0		1
Q9Y697	NFS1_HUMAN	Cysteine desulfurase, mitochondrial, EC 2.8.1.7	NFS1 NIFS HUSSY-08	1.50191	1.51126	1.59662	1			GOCC, MitoCarta 3.0	1
P23919	KTHY_HUMAN	Thymidylate kinase, EC 2.7.4.9 (dTMP kinase)	DTYMK CDC8 TMPK TYMK	1.49851	1.55631	1.76284	1			GOCC, MitoCarta 3.0	1			1
Q96Q11	TRNT1_HUMAN	CCA tRNA nucleotidyltransferase 1, mitochondrial, EC 2.7.7.72 (Mitochondrial tRNA nucleotidyl transferase, CCA-adding) (mt CCA-adding enzyme) (mt tRNA CCA-diphosphorylase) (mt tRNA CCA-pyrophosphorylase) (mt tRNA adenylyltransferase)	TRNT1 CGI-47	1.49037	1.7002	1.24477	1			GOCC, MitoCarta 3.0	1
Q92542	NICA_HUMAN	Nicastrin	NCSTN KIAA0253 UNQ1874/PRO4317	1.48871	1.70352	1.31343	1			GOCC					1
Q9UHQ9	NB5R1_HUMAN	NADH-cytochrome b5 reductase 1, b5R.1, EC 1.6.2.2 (Humb5R2) (NAD(P)H:quinone oxidoreductase type 3 polypeptide A2)	CYB5R1 NQO3A2 UNQ3049/PRO9865	1.48772	3.00663	1.56431	1			GOCC					1
O75746	CMC1_HUMAN	Calcium-binding mitochondrial carrier protein Aralar1 (Mitochondrial aspartate glutamate carrier 1) (Solute carrier family 25 member 12)	SLC25A12 ARALAR1	1.483	1.48406	1.56083	1			GOCC, MitoCarta 3.0		1
Q5T9A4	ATD3B_HUMAN	ATPase family AAA domain-containing protein 3B (AAA-TOB3)	ATAD3B KIAA1273 TOB3	1.4763	1.50316	1.28793	1			GOCC, MitoCarta 3.0		1
P0DPI2	GAL3A_HUMAN	Glutamine amidotransferase-like class 1 domain-containing protein 3, mitochondrial	GATD3 C21orf33 GATD3A	1.47466	1.34163	1.56936	1			GOCC					1
P24539	AT5F1_HUMAN	ATP synthase F(0) complex subunit B1, mitochondrial (ATP synthase peripheral stalk-membrane subunit b) (ATP synthase proton-transporting mitochondrial F(0) complex subunit B1) (ATP synthase subunit b, ATPase subunit b)	ATP5PB ATP5F1	1.4638	1.97145	1.94306	1			GOCC, MitoCarta 3.0	1	1
P26440	IVD_HUMAN	Isovaleryl-CoA dehydrogenase, mitochondrial, IVD, EC 1.3.8.4 (Butyryl-CoA dehydrogenase, EC 1.3.8.1)	IVD	1.45325	1.38862	1.78945	1			GOCC, MitoCarta 3.0	1
P19404	NDUV2_HUMAN	NADH dehydrogenase [ubiquinone] flavoprotein 2, mitochondrial, EC 7.1.1.2 (NADH-ubiquinone oxidoreductase 24 kDa subunit)	NDUFV2	1.44503	1.01309	1.01049	1			GOCC, MitoCarta 3.0		1
Q9NP81	SYSM_HUMAN	Serine--tRNA ligase, mitochondrial, EC 6.1.1.11 (SerRSmt) (Seryl-tRNA synthetase, SerRS) (Seryl-tRNA(Ser/Sec) synthetase)	SARS2 SARSM	1.44174	1.43018	1.59661	1			GOCC, MitoCarta 3.0	1
P22570	ADRO_HUMAN	NADPH:adrenodoxin oxidoreductase, mitochondrial, AR, Adrenodoxin reductase, EC 1.18.1.6 (Ferredoxin--NADP(+) reductase, Ferredoxin reductase)	FDXR ADXR	1.43509	1.03623	2.10021	1			GOCC, MitoCarta 3.0	1	1
P35613	BASI_HUMAN	Basigin (5F7) (Collagenase stimulatory factor) (Extracellular matrix metalloproteinase inducer, EMMPRIN) (Hepatoma-associated antigen, HAb18G) (Leukocyte activation antigen M6) (OK blood group antigen) (Tumor cell-derived collagenase stimulatory factor, TCSF) (CD antigen CD147)	BSG UNQ6505/PRO21383	1.42932	1.78733	1.75704	1			GOCC					1
Q96HS1	PGAM5_HUMAN	Serine/threonine-protein phosphatase PGAM5, mitochondrial, EC 3.1.3.16 (Bcl-XL-binding protein v68) (Phosphoglycerate mutase family member 5)	PGAM5	1.41996	1.67782	1.52862	1			GOCC, MitoCarta 3.0			1
Q9BRT2	UQCC2_HUMAN	Ubiquinol-cytochrome-c reductase complex assembly factor 2 (Breast cancer-associated protein SGA-81M) (Mitochondrial nucleoid factor 1) (Mitochondrial protein M19)	UQCC2 C6orf125 MNF1	1.41807	1.94359	2.13391	1			GOCC, MitoCarta 3.0	1	1		1
O76031	CLPX_HUMAN	ATP-dependent Clp protease ATP-binding subunit clpX-like, mitochondrial	CLPX	1.40669	1.36019	1.53746	1			GOCC, MitoCarta 3.0	1	1
P55789	ALR_HUMAN	FAD-linked sulfhydryl oxidase ALR, EC 1.8.3.2 (Augmenter of liver regeneration, hERV1) (Hepatopoietin)	GFER ALR HERV1 HPO	1.40667	2.74674	2.2282	1			GOCC, MitoCarta 3.0				1
Q8IWL3	HSC20_HUMAN	Iron-sulfur cluster co-chaperone protein HscB (DnaJ homolog subfamily C member 20) [Cleaved into: Iron-sulfur cluster co-chaperone protein HscB, cytoplasmic, C-HSC20; Iron-sulfur cluster co-chaperone protein HscB, mitochondrial ]	HSCB DNAJC20 HSC20	1.40437	1.06103	1.40342	1			GOCC, MitoCarta 3.0	1
P45954	ACDSB_HUMAN	Short/branched chain specific acyl-CoA dehydrogenase, mitochondrial, SBCAD, EC 1.3.8.5 (2-methyl branched chain acyl-CoA dehydrogenase, 2-MEBCAD) (2-methylbutyryl-coenzyme A dehydrogenase, 2-methylbutyryl-CoA dehydrogenase)	ACADSB	1.3916	2.0837	1.76984	1			GOCC, MitoCarta 3.0	1
P00387	NB5R3_HUMAN	NADH-cytochrome b5 reductase 3, B5R, Cytochrome b5 reductase, EC 1.6.2.2 (Diaphorase-1) [Cleaved into: NADH-cytochrome b5 reductase 3 membrane-bound form; NADH-cytochrome b5 reductase 3 soluble form ]	CYB5R3 DIA1	1.38851	1.55027	1.56748	1			GOCC, MitoCarta 3.0			1
Q96E11	RRFM_HUMAN	Ribosome-recycling factor, mitochondrial, RRF (Ribosome-releasing factor, mitochondrial)	MRRF	1.3828	1.46567	2.23469	1			GOCC, MitoCarta 3.0	1
Q9GZT8	NIF3L_HUMAN	NIF3-like protein 1 (Amyotrophic lateral sclerosis 2 chromosomal region candidate gene 1 protein)	NIF3L1 ALS2CR1 MDS015 My018	1.36875	1.4637	1.2719	1			GOCC, MitoCarta 3.0	1
Q5T160	SYRM_HUMAN	Probable arginine--tRNA ligase, mitochondrial, EC 6.1.1.19 (Arginyl-tRNA synthetase, ArgRS)	RARS2 RARSL	1.36241	1.10365	1.62745	1			GOCC, MitoCarta 3.0	1
P09001	RM03_HUMAN	39S ribosomal protein L3, mitochondrial, L3mt, MRP-L3 (Mitochondrial large ribosomal subunit protein uL3m)	MRPL3 MRL3 RPML3	1.35397	1.79531	2.17761	1			GOCC, MitoCarta 3.0	1	1
P52789	HXK2_HUMAN	Hexokinase-2, EC 2.7.1.1 (Hexokinase type II, HK II) (Hexokinase-B) (Muscle form hexokinase)	HK2	1.34246	1.37114	1.17322	1			GOCC			1
Q96TA2	YMEL1_HUMAN	ATP-dependent zinc metalloprotease YME1L1, EC 3.4.24.- (ATP-dependent metalloprotease FtsH1) (Meg-4) (Presenilin-associated metalloprotease, PAMP) (YME1-like protein 1)	YME1L1 FTSH1 YME1L UNQ1868/PRO4304	1.33966	1.40319	1.33567	1			GOCC, MitoCarta 3.0		1
P22830	HEMH_HUMAN	Ferrochelatase, mitochondrial, EC 4.99.1.1 (Heme synthase) (Protoheme ferro-lyase)	FECH	1.33798	1.96634	1.59509	1			GOCC, MitoCarta 3.0	1	1
Q9HCC0	MCCB_HUMAN	Methylcrotonoyl-CoA carboxylase beta chain, mitochondrial, MCCase subunit beta, EC 6.4.1.4 (3-methylcrotonyl-CoA carboxylase 2) (3-methylcrotonyl-CoA carboxylase non-biotin-containing subunit) (3-methylcrotonyl-CoA:carbon dioxide ligase subunit beta)	MCCC2 MCCB	1.33447	1.45703	1.69614	1			GOCC, MitoCarta 3.0	1
O14786	NRP1_HUMAN	Neuropilin-1 (Vascular endothelial cell growth factor 165 receptor) (CD antigen CD304)	NRP1 NRP VEGF165R	1.33093	1.67832	1.99317	1			GOCC					1
O43837	IDH3B_HUMAN	Isocitrate dehydrogenase [NAD] subunit beta, mitochondrial (Isocitric dehydrogenase subunit beta) (NAD(+)-specific ICDH subunit beta)	IDH3B	1.32874	2.61729	1.64163	1			GOCC, MitoCarta 3.0	1
P31327	CPSM_HUMAN	Carbamoyl-phosphate synthase [ammonia], mitochondrial, EC 6.3.4.16 (Carbamoyl-phosphate synthetase I, CPSase I)	CPS1	1.32669	1.03648	1.24943	1			GOCC, MitoCarta 3.0	1	1
Q8TAE8	G45IP_HUMAN	Growth arrest and DNA damage-inducible proteins-interacting protein 1 (39S ribosomal protein L59, mitochondrial, MRP-L59) (CKII beta-associating protein) (CR6-interacting factor 1, CRIF1) (Mitochondrial large ribosomal subunit protein mL64) (Papillomavirus L2-interacting nuclear protein 1, PLINP, PLINP-1) (p53-responsive gene 6 protein)	GADD45GIP1 MRPL59 PLINP1 PRG6	1.32225	1.29006	1.68833	1			GOCC, MitoCarta 3.0	1
Q16698	DECR_HUMAN	2,4-dienoyl-CoA reductase [(3E)-enoyl-CoA-producing], mitochondrial, EC 1.3.1.124 (2,4-dienoyl-CoA reductase [NADPH], 4-enoyl-CoA reductase [NADPH]) (Short chain dehydrogenase/reductase family 18C member 1)	DECR1 DECR SDR18C1	1.31992	1.44745	1.28744	1			GOCC, MitoCarta 3.0	1
Q9BYT8	NEUL_HUMAN	Neurolysin, mitochondrial, EC 3.4.24.16 (Angiotensin-binding protein) (Microsomal endopeptidase, MEP) (Mitochondrial oligopeptidase M) (Neurotensin endopeptidase)	NLN AGTBP KIAA1226	1.31486	1.34578	1.73968	1			GOCC, MitoCarta 3.0	1			1
Q9Y676	RT18B_HUMAN	28S ribosomal protein S18b, mitochondrial, MRP-S18-b, Mrps18-b, S18mt-b (28S ribosomal protein S18-2, mitochondrial, MRP-S18-2) (Mitochondrial small ribosomal subunit protein bS18b) (Mitochondrial small ribosomal subunit protein mS40)	MRPS18B C6orf14 HSPC183 PTD017	1.3032	2.03408	2.18711	1			GOCC, MitoCarta 3.0	1	1
Q4G0N4	NAKD2_HUMAN	NAD kinase 2, mitochondrial, EC 2.7.1.23 (Mitochondrial NAD kinase) (NAD kinase domain-containing protein 1, mitochondrial)	NADK2 C5orf33 MNADK NADKD1	1.29512	1.1877	1.15099	1			GOCC, MitoCarta 3.0	1
Q16891	MIC60_HUMAN	MICOS complex subunit MIC60 (Cell proliferation-inducing gene 4/52 protein) (Mitochondrial inner membrane protein) (Mitofilin) (p87/89)	IMMT HMP MIC60 MINOS2 PIG4 PIG52	1.29222	1.36621	1.75661	1			GOCC, MitoCarta 3.0		1		1
Q9HC36	MRM3_HUMAN	rRNA methyltransferase 3, mitochondrial, EC 2.1.1.- (16S rRNA (guanosine(1370)-2'-O)-methyltransferase) (16S rRNA [Gm1370] 2'-O-methyltransferase) (RNA methyltransferase-like protein 1)	MRM3 RNMTL1 HC90	1.28617	1.32132	1.4426	1			GOCC, MitoCarta 3.0	1
Q8WWV3	RT4I1_HUMAN	Reticulon-4-interacting protein 1, mitochondrial (NOGO-interacting mitochondrial protein)	RTN4IP1 NIMP	1.28125	1.90619	1.22674	1			GOCC, MitoCarta 3.0	1		1
P07203	GPX1_HUMAN	Glutathione peroxidase 1, GPx-1, GSHPx-1, EC 1.11.1.9 (Cellular glutathione peroxidase)	GPX1	1.26913	1.80763	1.33877	1			GOCC, MitoCarta 3.0	1
Q13011	ECH1_HUMAN	Delta(3,5)-Delta(2,4)-dienoyl-CoA isomerase, mitochondrial, EC 5.3.3.-	ECH1	1.26366	1.21855	1.00966	1			GOCC, MitoCarta 3.0	1
Q7L2E3	DHX30_HUMAN	ATP-dependent RNA helicase DHX30, EC 3.6.4.13 (DEAH box protein 30)	DHX30 DDX30 KIAA0890	1.2627	1.14199	1.38268	1			GOCC, MitoCarta 3.0	1
P07954	FUMH_HUMAN	Fumarate hydratase, mitochondrial, Fumarase, HsFH, EC 4.2.1.2	FH	1.2551	1.29385	1.48593	1			GOCC, MitoCarta 3.0	1
Q5JRX3	PREP_HUMAN	Presequence protease, mitochondrial, hPreP, EC 3.4.24.- (Pitrilysin metalloproteinase 1, Metalloprotease 1, hMP1)	PITRM1 KIAA1104 MP1 PREP	1.23906	1.56622	1.73306	1			GOCC, MitoCarta 3.0	1
Q96RP9	EFGM_HUMAN	Elongation factor G, mitochondrial, EF-Gmt (Elongation factor G 1, mitochondrial, mEF-G 1) (Elongation factor G1, hEFG1)	GFM1 EFG EFG1 GFM	1.22327	1.17995	1.09196	1			GOCC, MitoCarta 3.0	1
Q8TCS8	PNPT1_HUMAN	Polyribonucleotide nucleotidyltransferase 1, mitochondrial, EC 2.7.7.8 (3'-5' RNA exonuclease OLD35) (PNPase old-35) (Polynucleotide phosphorylase 1, PNPase 1) (Polynucleotide phosphorylase-like protein)	PNPT1 PNPASE	1.221	1.02504	1.64815	1			GOCC, MitoCarta 3.0	1			1
P30626	SORCN_HUMAN	Sorcin (22 kDa protein) (CP-22, CP22) (V19)	SRI	1.22096	1.371	1.09227	1			GOCC					1
Q9BWM7	SFXN3_HUMAN	Sideroflexin-3	SFXN3	1.21718	1.21438	1.70189	1			GOCC, MitoCarta 3.0		1
Q9Y6H1	CHCH2_HUMAN	Coiled-coil-helix-coiled-coil-helix domain-containing protein 2 (Aging-associated gene 10 protein) (HCV NS2 trans-regulated protein, NS2TP)	CHCHD2 C7orf17 AAG10	1.19956	1.84547	1.07859	1			GOCC, MitoCarta 3.0				1
P24752	THIL_HUMAN	Acetyl-CoA acetyltransferase, mitochondrial, EC 2.3.1.9 (Acetoacetyl-CoA thiolase) (T2)	ACAT1 ACAT MAT	1.19199	1.32553	1.3087	1			GOCC, MitoCarta 3.0	1
P31930	QCR1_HUMAN	Cytochrome b-c1 complex subunit 1, mitochondrial (Complex III subunit 1) (Core protein I) (Ubiquinol-cytochrome-c reductase complex core protein 1)	UQCRC1	1.17129	1.60193	1.48735	1			GOCC, MitoCarta 3.0		1
Q96I51	RCC1L_HUMAN	RCC1-like G exchanging factor-like protein, RCC1-like (Williams-Beuren syndrome chromosomal region 16 protein)	RCC1L WBSCR16	1.17078	1.29954	1.2565	1			GOCC, MitoCarta 3.0	1	1
P49590	SYHM_HUMAN	Histidine--tRNA ligase, mitochondrial, EC 6.1.1.21 (Histidine--tRNA ligase-like) (Histidyl-tRNA synthetase, HisRS)	HARS2 HARSL HARSR HO3	1.1559	1.58873	1.12582	1			GOCC, MitoCarta 3.0	1
Q9Y3D3	RT16_HUMAN	28S ribosomal protein S16, mitochondrial, MRP-S16, S16mt (Mitochondrial small ribosomal subunit protein bS16m)	MRPS16 RPMS16 CGI-132	1.15521	1.74228	1.04976	1			GOCC, MitoCarta 3.0	1	1
P43304	GPDM_HUMAN	Glycerol-3-phosphate dehydrogenase, mitochondrial, GPD-M, GPDH-M, EC 1.1.5.3 (mitohondrial glycerophosphate dehydrogenase gene, mGDH) (mtGPD)	GPD2	1.15095	1.30835	1.31039	1			GOCC, MitoCarta 3.0		1
Q9BT17	MTG1_HUMAN	Mitochondrial ribosome-associated GTPase 1 (GTP-binding protein 7) (Mitochondrial GTPase 1)	MTG1 GTPBP7	1.1455	1.71428	1.99576	1			GOCC, MitoCarta 3.0	1	1
P22033	MUTA_HUMAN	Methylmalonyl-CoA mutase, mitochondrial, MCM, EC 5.4.99.2 (Methylmalonyl-CoA isomerase)	MMUT MUT	1.14432	1.49716	1.34432	1			GOCC, MitoCarta 3.0	1
P04179	SODM_HUMAN	Superoxide dismutase [Mn], mitochondrial, EC 1.15.1.1	SOD2	1.1265	1.09757	1.08385	1			GOCC, MitoCarta 3.0	1
A6NJ78	MET15_HUMAN	12S rRNA N4-methylcytidine (m4C) methyltransferase, 12S rRNA m4C methyltransferase, EC 2.1.1.- (Methyltransferase 5 domain-containing protein 1) (Methyltransferase-like protein 15)	METTL15 METT5D1	1.08273	1.54928	1.31191	1			GOCC, MitoCarta 3.0	1
O75380	NDUS6_HUMAN	NADH dehydrogenase [ubiquinone] iron-sulfur protein 6, mitochondrial (Complex I-13kD-A, CI-13kD-A) (NADH-ubiquinone oxidoreductase 13 kDa-A subunit)	NDUFS6	1.08154	1.23753	1.11393	1			GOCC, MitoCarta 3.0		1
P23786	CPT2_HUMAN	Carnitine O-palmitoyltransferase 2, mitochondrial, EC 2.3.1.21 (Carnitine palmitoyltransferase II, CPT II)	CPT2 CPT1	1.08075	1.15897	1.52239	1			GOCC, MitoCarta 3.0		1
Q96BQ5	CC127_HUMAN	Coiled-coil domain-containing protein 127	CCDC127	1.07626	1.24728	1.02346	1			MitoCarta 3.0					1
Q5VWZ2	LYPL1_HUMAN	Lysophospholipase-like protein 1, EC 3.1.2.22	LYPLAL1	1.07091	1.03726	1.35373	1			MitoCarta 3.0					1
Q9UJS0	CMC2_HUMAN	Calcium-binding mitochondrial carrier protein Aralar2 (Citrin) (Mitochondrial aspartate glutamate carrier 2) (Solute carrier family 25 member 13)	SLC25A13 ARALAR2	1.05307	1.52049	1.39515	1			GOCC, MitoCarta 3.0		1
Q02218	ODO1_HUMAN	2-oxoglutarate dehydrogenase complex component E1, E1o, OGDC-E1, OGDH-E1, EC 1.2.4.2 (2-oxoglutarate dehydrogenase, mitochondrial) (Alpha-ketoglutarate dehydrogenase, Alpha-KGDH-E1) (Thiamine diphosphate (ThDP)-dependent 2-oxoglutarate dehydrogenase)	OGDH	1.05296	1.07778	1.34805	1			GOCC, MitoCarta 3.0	1
Q9NVH1	DJC11_HUMAN	DnaJ homolog subfamily C member 11	DNAJC11	1.04358	1.20836	1.08196	1			GOCC, MitoCarta 3.0			1
Q13825	AUHM_HUMAN	Methylglutaconyl-CoA hydratase, mitochondrial, 3-MG-CoA hydratase, EC 4.2.1.18 (AU-specific RNA-binding enoyl-CoA hydratase, AU-binding protein/enoyl-CoA hydratase) (Itaconyl-CoA hydratase, EC 4.2.1.56)	AUH	1.03863	1.24019	1.67769	1			GOCC, MitoCarta 3.0	1
Q96EY1	DNJA3_HUMAN	DnaJ homolog subfamily A member 3, mitochondrial (DnaJ protein Tid-1, hTid-1) (Hepatocellular carcinoma-associated antigen 57) (Tumorous imaginal discs protein Tid56 homolog)	DNAJA3 HCA57 TID1	1.02891	1.02563	1.22291	1			GOCC, MitoCarta 3.0	1
Q9UBQ6	EXTL2_HUMAN	Exostosin-like 2, EC 2.4.1.223 (Alpha-1,4-N-acetylhexosaminyltransferase EXTL2) (Alpha-GalNAcT EXTL2) (EXT-related protein 2) (Glucuronyl-galactosyl-proteoglycan 4-alpha-N-acetylglucosaminyltransferase) [Cleaved into: Processed exostosin-like 2 ]	EXTL2 EXTR2	2.99891	2.59381	2.421		1
Q9NYL4	FKB11_HUMAN	Peptidyl-prolyl cis-trans isomerase FKBP11, PPIase FKBP11, EC 5.2.1.8 (19 kDa FK506-binding protein, 19 kDa FKBP, FKBP-19) (FK506-binding protein 11, FKBP-11) (Rotamase)	FKBP11 FKBP19 UNQ336/PRO535	2.98714	1.49035	1.03451		1
Q14165	MLEC_HUMAN	Malectin	MLEC KIAA0152	2.98251	1.97323	1.93869		1
Q99653	CHP1_HUMAN	Calcineurin B homologous protein 1 (Calcineurin B-like protein) (Calcium-binding protein CHP) (Calcium-binding protein p22) (EF-hand calcium-binding domain-containing protein p22)	CHP1 CHP	2.94237	3.05812	2.82206		1
Q9Y2B0	CNPY2_HUMAN	Protein canopy homolog 2 (MIR-interacting saposin-like protein) (Putative secreted protein Zsig9) (Transmembrane protein 4)	CNPY2 MSAP TMEM4 ZSIG9 UNQ1943/PRO4426	2.83476	2.70069	2.38898		1
P54709	AT1B3_HUMAN	Sodium/potassium-transporting ATPase subunit beta-3 (Sodium/potassium-dependent ATPase subunit beta-3, ATPB-3) (CD antigen CD298)	ATP1B3	2.76251	1.80712	1.86212		1
Q9UHG3	PCYOX_HUMAN	Prenylcysteine oxidase 1, EC 1.8.3.5 (Prenylcysteine lyase)	PCYOX1 KIAA0908 PCL1 UNQ597/PRO1183	2.7623	1.89474	1.84741		1
P38571	LICH_HUMAN	Lysosomal acid lipase/cholesteryl ester hydrolase, Acid cholesteryl ester hydrolase, LAL, EC 3.1.1.13 (Cholesteryl esterase) (Lipase A) (Sterol esterase)	LIPA	2.73208	1.45377	2.3297		1
P54619	AAKG1_HUMAN	5'-AMP-activated protein kinase subunit gamma-1, AMPK gamma1, AMPK subunit gamma-1, AMPKg	PRKAG1	2.64145	1.4899	1.32877		1
Q9UNM6	PSD13_HUMAN	26S proteasome non-ATPase regulatory subunit 13 (26S proteasome regulatory subunit RPN9) (26S proteasome regulatory subunit S11) (26S proteasome regulatory subunit p40.5)	PSMD13	2.63474	2.12352	1.97726		1
P50897	PPT1_HUMAN	Palmitoyl-protein thioesterase 1, PPT-1, EC 3.1.2.22 (Palmitoyl-protein hydrolase 1)	PPT1 CLN1 PPT	2.61887	1.71587	1.92938		1
O43808	PM34_HUMAN	Peroxisomal membrane protein PMP34 (34 kDa peroxisomal membrane protein) (Solute carrier family 25 member 17)	SLC25A17 PMP34	2.5999	2.36687	3.28576		1
Q15907	RB11B_HUMAN	Ras-related protein Rab-11B, EC 3.6.5.2 (GTP-binding protein YPT3)	RAB11B YPT3	2.55454	1.95999	1.95455		1
P11279	LAMP1_HUMAN	Lysosome-associated membrane glycoprotein 1, LAMP-1, Lysosome-associated membrane protein 1 (CD107 antigen-like family member A) (CD antigen CD107a)	LAMP1	2.52879	1.81106	1.37994		1
P61769	B2MG_HUMAN	Beta-2-microglobulin [Cleaved into: Beta-2-microglobulin form pI 5.3 ]	B2M CDABP0092 HDCMA22P	2.51719	2.55065	2.66413		1
Q92759	TF2H4_HUMAN	General transcription factor IIH subunit 4 (Basic transcription factor 2 52 kDa subunit, BTF2 p52) (General transcription factor IIH polypeptide 4) (TFIIH basal transcription factor complex p52 subunit)	GTF2H4	2.50541	1.94512	1.84874		1
Q9NX08	COMD8_HUMAN	COMM domain-containing protein 8	COMMD8 MDS022	2.50342	1.73076	1.69896		1
Q9BTV4	TMM43_HUMAN	Transmembrane protein 43 (Protein LUMA)	TMEM43 UNQ2564/PRO6244	2.49934	2.2421	2.18646		1
Q6IAA8	LTOR1_HUMAN	Ragulator complex protein LAMTOR1 (Late endosomal/lysosomal adaptor and MAPK and MTOR activator 1) (Lipid raft adaptor protein p18) (Protein associated with DRMs and endosomes) (p27Kip1-releasing factor from RhoA, p27RF-Rho)	LAMTOR1 C11orf59 PDRO PP7157	2.49745	2.44245	2.87302		1
P48509	CD151_HUMAN	CD151 antigen (GP27) (Membrane glycoprotein SFA-1) (Platelet-endothelial tetraspan antigen 3, PETA-3) (Tetraspanin-24, Tspan-24) (CD antigen CD151)	CD151 TSPAN24	2.45751	1.8598	1.75361		1
Q9BZJ0	CRNL1_HUMAN	Crooked neck-like protein 1 (Crooked neck homolog, hCrn)	CRNKL1 CRN CGI-201 MSTP021	2.45417	1.68089	2.13703		1
O75844	FACE1_HUMAN	CAAX prenyl protease 1 homolog, EC 3.4.24.84 (Farnesylated proteins-converting enzyme 1, FACE-1) (Prenyl protein-specific endoprotease 1) (Zinc metalloproteinase Ste24 homolog)	ZMPSTE24 FACE1 STE24	2.43775	1.54818	2.24327		1
P62269	RS18_HUMAN	40S ribosomal protein S18 (Ke-3, Ke3) (Small ribosomal subunit protein uS13)	RPS18 D6S218E	2.38233	2.01168	2.37978		1
Q9H5K3	SG196_HUMAN	Protein O-mannose kinase, POMK, EC 2.7.1.183 (Protein kinase-like protein SgK196) (Sugen kinase 196)	POMK SGK196	2.37364	1.89439	1.80823		1
O75629	CREG1_HUMAN	Protein CREG1 (Cellular repressor of E1A-stimulated genes 1)	CREG1 CREG UNQ727/PRO1409	2.34218	2.89389	3.14699		1
P42785	PCP_HUMAN	Lysosomal Pro-X carboxypeptidase, EC 3.4.16.2 (Angiotensinase C) (Lysosomal carboxypeptidase C) (Proline carboxypeptidase) (Prolylcarboxypeptidase, PRCP)	PRCP PCP	2.30449	1.98564	2.03651		1
P62277	RS13_HUMAN	40S ribosomal protein S13 (Small ribosomal subunit protein uS15)	RPS13	2.29544	2.47023	2.18256		1
P49721	PSB2_HUMAN	Proteasome subunit beta type-2 (Macropain subunit C7-I) (Multicatalytic endopeptidase complex subunit C7-I) (Proteasome component C7-I)	PSMB2	2.27263	2.39395	2.09035		1
P61026	RAB10_HUMAN	Ras-related protein Rab-10, EC 3.6.5.2	RAB10	2.27186	1.91451	2.04943		1
O00461	GOLI4_HUMAN	Golgi integral membrane protein 4 (Golgi integral membrane protein, cis, GIMPc) (Golgi phosphoprotein 4) (Golgi-localized phosphoprotein of 130 kDa, Golgi phosphoprotein of 130 kDa)	GOLIM4 GIMPC GOLPH4 GPP130	2.25867	2.00422	1.47467		1
O95302	FKBP9_HUMAN	Peptidyl-prolyl cis-trans isomerase FKBP9, PPIase FKBP9, EC 5.2.1.8 (63 kDa FK506-binding protein, 63 kDa FKBP, FKBP-63) (FK506-binding protein 9, FKBP-9) (Rotamase)	FKBP9 FKBP60 FKBP63	2.24726	2.057	2.02018		1
P30046	DOPD_HUMAN	D-dopachrome decarboxylase, EC 4.1.1.84 (D-dopachrome tautomerase) (Phenylpyruvate tautomerase II)	DDT	2.23984	2.18721	2.37943		1
P62820	RAB1A_HUMAN	Ras-related protein Rab-1A, EC 3.6.5.2 (YPT1-related protein)	RAB1A RAB1	2.22011	1.9315	1.31992		1
O75718	CRTAP_HUMAN	Cartilage-associated protein	CRTAP CASP	2.195	1.7436	1.50401		1
Q9NZ08	ERAP1_HUMAN	Endoplasmic reticulum aminopeptidase 1, EC 3.4.11.- (ARTS-1) (Adipocyte-derived leucine aminopeptidase, A-LAP) (Aminopeptidase PILS) (Puromycin-insensitive leucyl-specific aminopeptidase, PILS-AP) (Type 1 tumor necrosis factor receptor shedding aminopeptidase regulator)	ERAP1 APPILS ARTS1 KIAA0525 UNQ584/PRO1154	2.19337	1.97367	2.04246		1
Q6P4E1	GOLM2_HUMAN	Protein GOLM2 (Cancer susceptibility candidate gene 4 protein, CASC4) (Golgi membrane protein 2)	GOLM2 CASC4 UNQ2573/PRO6308	2.19217	2.03405	1.58665		1
O00629	IMA3_HUMAN	Importin subunit alpha-3 (Importin alpha Q1, Qip1) (Karyopherin subunit alpha-4)	KPNA4 QIP1	2.19188	1.20728	1.21831		1
Q9Y282	ERGI3_HUMAN	Endoplasmic reticulum-Golgi intermediate compartment protein 3 (Serologically defined breast cancer antigen NY-BR-84)	ERGIC3 C20orf47 ERV46 SDBCAG84 CGI-54 PRO0989	2.17503	1.62047	1.80694		1
P06280	AGAL_HUMAN	Alpha-galactosidase A, EC 3.2.1.22 (Alpha-D-galactosidase A) (Alpha-D-galactoside galactohydrolase) (Galactosylgalactosylglucosylceramidase GLA) (Melibiase) (Agalsidase)	GLA	2.17314	1.62946	1.63028		1
O75934	SPF27_HUMAN	Pre-mRNA-splicing factor SPF27 (Breast carcinoma-amplified sequence 2) (DNA amplified in mammary carcinoma 1 protein) (Spliceosome-associated protein SPF 27)	BCAS2 DAM1	2.17282	1.86934	1.92702		1
P62330	ARF6_HUMAN	ADP-ribosylation factor 6, EC 3.6.5.2	ARF6	2.17105	2.03569	2.65569		1
O43324	MCA3_HUMAN	Eukaryotic translation elongation factor 1 epsilon-1 (Aminoacyl tRNA synthetase complex-interacting multifunctional protein 3) (Elongation factor p18) (Multisynthase complex auxiliary component p18)	EEF1E1 AIMP3 P18	2.16794	1.14426	1.63571		1
P55145	MANF_HUMAN	Mesencephalic astrocyte-derived neurotrophic factor (Arginine-rich protein) (Protein ARMET)	MANF ARMET ARP	2.16198	2.24931	2.04363		1
Q9Y3B3	TMED7_HUMAN	Transmembrane emp24 domain-containing protein 7 (p24 family protein gamma-3, p24gamma3) (p27)	TMED7 CGI-109	2.13992	1.74533	1.64788		1
P62314	SMD1_HUMAN	Small nuclear ribonucleoprotein Sm D1, Sm-D1 (Sm-D autoantigen) (snRNP core protein D1)	SNRPD1	2.1289	1.53149	1.5304		1
Q13641	TPBG_HUMAN	Trophoblast glycoprotein (5T4 oncofetal antigen) (5T4 oncofetal trophoblast glycoprotein, 5T4 oncotrophoblast glycoprotein) (M6P1) (Wnt-activated inhibitory factor 1, WAIF1)	TPBG 5T4	2.10954	2.31175	1.30953		1
Q9UEU0	VTI1B_HUMAN	Vesicle transport through interaction with t-SNAREs homolog 1B (Vesicle transport v-SNARE protein Vti1-like 1) (Vti1-rp1)	VTI1B VTI1 VTI1L VTI1L1 VTI2	2.10692	1.89926	2.51197		1
O60925	PFD1_HUMAN	Prefoldin subunit 1	PFDN1 PFD1	2.09735	2.51737	2.49993		1
P17342	ANPRC_HUMAN	Atrial natriuretic peptide receptor 3 (Atrial natriuretic peptide clearance receptor) (Atrial natriuretic peptide receptor type C, ANP-C, ANPR-C, NPR-C)	NPR3 ANPRC C5orf23 NPRC	2.04053	1.454	1.7881		1
Q9BPX5	ARP5L_HUMAN	Actin-related protein 2/3 complex subunit 5-like protein (Arp2/3 complex 16 kDa subunit 2, ARC16-2)	ARPC5L	2.01411	2.37642	2.6344		1
Q8WYA6	CTBL1_HUMAN	Beta-catenin-like protein 1 (Nuclear-associated protein, NAP) (Testis development protein NYD-SP19)	CTNNBL1 C20orf33 PP8304	2.0139	1.54888	1.43795		1
Q969X5	ERGI1_HUMAN	Endoplasmic reticulum-Golgi intermediate compartment protein 1 (ER-Golgi intermediate compartment 32 kDa protein, ERGIC-32)	ERGIC1 ERGIC32 KIAA1181 HT034	2.00794	1.57884	1.34932		1
P16070	CD44_HUMAN	CD44 antigen (CDw44) (Epican) (Extracellular matrix receptor III, ECMR-III) (GP90 lymphocyte homing/adhesion receptor) (HUTCH-I) (Heparan sulfate proteoglycan) (Hermes antigen) (Hyaluronate receptor) (Phagocytic glycoprotein 1, PGP-1) (Phagocytic glycoprotein I, PGP-I) (CD antigen CD44)	CD44 LHR MDU2 MDU3 MIC4	1.99546	1.59192	1.22062		1
Q86TX2	ACOT1_HUMAN	Acyl-coenzyme A thioesterase 1, Acyl-CoA thioesterase 1, EC 3.1.2.- (CTE-I) (CTE-Ib) (Inducible cytosolic acyl-coenzyme A thioester hydrolase) (Long chain acyl-CoA thioester hydrolase, Long chain acyl-CoA hydrolase) (Palmitoyl-coenzyme A thioesterase, EC 3.1.2.2)	ACOT1 CTE1	1.99419	1.82262	2.13171		1
Q9BT78	CSN4_HUMAN	COP9 signalosome complex subunit 4, SGN4, Signalosome subunit 4 (JAB1-containing signalosome subunit 4)	COPS4 CSN4	1.98491	1.52224	1.69495		1
Q01105	SET_HUMAN	Protein SET (HLA-DR-associated protein II) (Inhibitor of granzyme A-activated DNase, IGAAD) (PHAPII) (Phosphatase 2A inhibitor I2PP2A, I-2PP2A) (Template-activating factor I, TAF-I)	SET	1.97924	2.04646	1.36508		1
P61916	NPC2_HUMAN	NPC intracellular cholesterol transporter 2 (Epididymal secretory protein E1) (Human epididymis-specific protein 1, He1) (Niemann-Pick disease type C2 protein)	NPC2 HE1	1.9628	2.07563	1.13855		1
P61009	SPCS3_HUMAN	Signal peptidase complex subunit 3 (Microsomal signal peptidase 22/23 kDa subunit, SPC22/23, SPase 22/23 kDa subunit)	SPCS3 SPC22 UNQ1841/PRO3567	1.94224	1.79241	1.63652		1
P53634	CATC_HUMAN	Dipeptidyl peptidase 1, EC 3.4.14.1 (Cathepsin C) (Cathepsin J) (Dipeptidyl peptidase I, DPP-I, DPPI) (Dipeptidyl transferase) [Cleaved into: Dipeptidyl peptidase 1 exclusion domain chain (Dipeptidyl peptidase I exclusion domain chain); Dipeptidyl peptidase 1 heavy chain (Dipeptidyl peptidase I heavy chain); Dipeptidyl peptidase 1 light chain (Dipeptidyl peptidase I light chain) ]	CTSC CPPI	1.93615	1.63039	1.96202		1
Q15041	AR6P1_HUMAN	ADP-ribosylation factor-like protein 6-interacting protein 1, ARL-6-interacting protein 1, Aip-1 (Apoptotic regulator in the membrane of the endoplasmic reticulum)	ARL6IP1 ARL6IP ARMER KIAA0069	1.92264	1.34148	1.74519		1
P48960	AGRE5_HUMAN	Adhesion G protein-coupled receptor E5 (Leukocyte antigen CD97) (CD antigen CD97) [Cleaved into: Adhesion G protein-coupled receptor E5 subunit alpha; Adhesion G protein-coupled receptor E5 subunit beta ]	ADGRE5 CD97	1.9097	2.2206	2.1991		1
Q14118	DAG1_HUMAN	Dystroglycan 1 (Dystroglycan) (Dystrophin-associated glycoprotein 1) [Cleaved into: Alpha-dystroglycan, Alpha-DG; Beta-dystroglycan, Beta-DG ]	DAG1	1.88425	1.6017	1.51627		1
P08579	RU2B_HUMAN	U2 small nuclear ribonucleoprotein B'', U2 snRNP B''	SNRPB2	1.87922	1.57695	1.80418		1
Q9H488	OFUT1_HUMAN	GDP-fucose protein O-fucosyltransferase 1, EC 2.4.1.221 (Peptide-O-fucosyltransferase 1, O-FucT-1)	POFUT1 FUT12 KIAA0180	1.87714	2.05871	1.29715		1
P61254	RL26_HUMAN	60S ribosomal protein L26 (Large ribosomal subunit protein uL24)	RPL26	1.87217	1.69817	2.43614		1
P30530	UFO_HUMAN	Tyrosine-protein kinase receptor UFO, EC 2.7.10.1 (AXL oncogene)	AXL UFO	1.86114	1.66581	1.35657		1
O00592	PODXL_HUMAN	Podocalyxin (GCTM-2 antigen) (Gp200) (Podocalyxin-like protein 1, PC, PCLP-1)	PODXL PCLP PCLP1	1.85701	1.79171	1.47987		1
Q15102	PA1B3_HUMAN	Platelet-activating factor acetylhydrolase IB subunit alpha1, EC 3.1.1.47 (PAF acetylhydrolase 29 kDa subunit, PAF-AH 29 kDa subunit) (PAF-AH subunit gamma, PAFAH subunit gamma)	PAFAH1B3 PAFAHG	1.84922	2.62961	1.43978		1
P49755	TMEDA_HUMAN	Transmembrane emp24 domain-containing protein 10, Protein TMED10 (21 kDa transmembrane-trafficking protein) (S31I125) (S31III125) (Tmp-21-I) (Transmembrane protein Tmp21) (p23) (p24 family protein delta-1, p24delta1) (p24delta)	TMED10 TMP21	1.83955	1.89755	1.52697		1
Q15008	PSMD6_HUMAN	26S proteasome non-ATPase regulatory subunit 6 (26S proteasome regulatory subunit RPN7) (26S proteasome regulatory subunit S10) (Breast cancer-associated protein SGA-113M) (Phosphonoformate immuno-associated protein 4) (Proteasome regulatory particle subunit p44S10) (p42A)	PSMD6 KIAA0107 PFAAP4	1.81872	1.03245	2.09709		1
Q9Y653	AGRG1_HUMAN	Adhesion G-protein coupled receptor G1 (G-protein coupled receptor 56) (Protein TM7XN1) [Cleaved into: ADGRG1 N-terminal fragment, ADGRG1 NT (GPR56 N-terminal fragment, GPR56 NT, GPR56(N)) (GPR56 extracellular subunit) (GPR56 subunit alpha); ADGRG1 C-terminal fragment, ADGRG1 CT (GPR56 C-terminal fragment, GPR56 CT, GPR56(C)) (GPR56 seven-transmembrane subunit, GPR56 7TM) (GPR56 subunit beta) ]	ADGRG1 GPR56 TM7LN4 TM7XN1 UNQ540/PRO1083	1.81105	1.98642	1.84508		1
Q9UBW8	CSN7A_HUMAN	COP9 signalosome complex subunit 7a, SGN7a, Signalosome subunit 7a (Dermal papilla-derived protein 10) (JAB1-containing signalosome subunit 7a)	COPS7A CSN7A DERP10	1.8091	1.61209	1.6741		1
O94874	UFL1_HUMAN	E3 UFM1-protein ligase 1, EC 2.3.2.- (E3 UFM1-protein transferase 1) (Multiple alpha-helix protein located at ER) (Novel LZAP-binding protein) (Regulator of C53/LZAP and DDRGK1)	UFL1 KIAA0776 MAXER NLBP RCAD	1.80679	1.51178	1.55226		1
Q6ZRP7	QSOX2_HUMAN	Sulfhydryl oxidase 2, EC 1.8.3.2 (Neuroblastoma-derived sulfhydryl oxidase) (Quiescin Q6-like protein 1)	QSOX2 QSCN6L1 SOXN	1.79567	1.0516	1.20141		1
P61421	VA0D1_HUMAN	V-type proton ATPase subunit d 1, V-ATPase subunit d 1 (32 kDa accessory protein) (V-ATPase 40 kDa accessory protein) (V-ATPase AC39 subunit, p39) (Vacuolar proton pump subunit d 1)	ATP6V0D1 ATP6D VPATPD	1.79527	1.40718	1.52257		1
Q9BVK6	TMED9_HUMAN	Transmembrane emp24 domain-containing protein 9 (GMP25) (Glycoprotein 25L2) (p24 family protein alpha-2, p24alpha2) (p25)	TMED9 GP25L2	1.78835	1.78685	2.06216		1
P80303	NUCB2_HUMAN	Nucleobindin-2 (DNA-binding protein NEFA) (Epididymis secretory protein Li 109) (Gastric cancer antigen Zg4) (Prepronesfatin) [Cleaved into: Nesfatin-1 ]	NUCB2 NEFA	1.78449	1.14825	1.00379		1
Q9UKM7	MA1B1_HUMAN	Endoplasmic reticulum mannosyl-oligosaccharide 1,2-alpha-mannosidase, EC 3.2.1.113 (ER alpha-1,2-mannosidase) (ER mannosidase 1, ERMan1) (Man9GlcNAc2-specific-processing alpha-mannosidase) (Mannosidase alpha class 1B member 1)	MAN1B1 UNQ747/PRO1477	1.77265	1.52237	1.41354		1
Q9UMR5	PPT2_HUMAN	Lysosomal thioesterase PPT2, PPT-2, EC 3.1.2.- (S-thioesterase G14)	PPT2	1.76981	1.98322	1.5281		1
P50895	BCAM_HUMAN	Basal cell adhesion molecule (Auberger B antigen) (B-CAM cell surface glycoprotein) (F8/G253 antigen) (Lutheran antigen) (Lutheran blood group glycoprotein) (CD antigen CD239)	BCAM LU MSK19	1.76258	1.39761	1.258		1
P62841	RS15_HUMAN	40S ribosomal protein S15 (RIG protein) (Small ribosomal subunit protein uS19)	RPS15 RIG	1.75665	1.51487	1.05525		1
P04844	RPN2_HUMAN	Dolichyl-diphosphooligosaccharide--protein glycosyltransferase subunit 2 (Dolichyl-diphosphooligosaccharide--protein glycosyltransferase 63 kDa subunit) (RIBIIR) (Ribophorin II, RPN-II) (Ribophorin-2)	RPN2	1.75093	1.52614	1.1917		1
O95816	BAG2_HUMAN	BAG family molecular chaperone regulator 2, BAG-2 (Bcl-2-associated athanogene 2)	BAG2	1.74742	1.48508	1.34354		1
P67812	SC11A_HUMAN	Signal peptidase complex catalytic subunit SEC11A, EC 3.4.21.89 (Endopeptidase SP18) (Microsomal signal peptidase 18 kDa subunit, SPase 18 kDa subunit) (SEC11 homolog A) (SEC11-like protein 1) (SPC18)	SEC11A SEC11L1 SPC18 SPCS4A	1.74727	1.84871	1.39821		1
Q02818	NUCB1_HUMAN	Nucleobindin-1 (CALNUC)	NUCB1 NUC	1.73746	1.87145	1.78211		1
P05783	K1C18_HUMAN	Keratin, type I cytoskeletal 18 (Cell proliferation-inducing gene 46 protein) (Cytokeratin-18, CK-18) (Keratin-18, K18)	KRT18 CYK18 PIG46	1.72936	1.65869	1.51718		1
Q7L5N1	CSN6_HUMAN	COP9 signalosome complex subunit 6, SGN6, Signalosome subunit 6 (JAB1-containing signalosome subunit 6) (MOV34 homolog) (Vpr-interacting protein, hVIP)	COPS6 CSN6 HVIP	1.71313	1.1496	1.31892		1
O15514	RPB4_HUMAN	DNA-directed RNA polymerase II subunit RPB4, RNA polymerase II subunit B4 (DNA-directed RNA polymerase II subunit D) (RNA polymerase II 16 kDa subunit, RPB16)	POLR2D	1.69529	1.56733	1.68299		1
P61803	DAD1_HUMAN	Dolichyl-diphosphooligosaccharide--protein glycosyltransferase subunit DAD1, Oligosaccharyl transferase subunit DAD1 (Defender against cell death 1, DAD-1)	DAD1	1.68525	1.54879	2.0431		1
Q92791	SC65_HUMAN	Endoplasmic reticulum protein SC65 (Leprecan-like protein 4) (Nucleolar autoantigen No55) (Prolyl 3-hydroxylase family member 4) (Synaptonemal complex protein SC65)	P3H4 LEPREL4 NOL55 SC65	1.67434	1.51389	1.25675		1
P16949	STMN1_HUMAN	Stathmin (Leukemia-associated phosphoprotein p18) (Metablastin) (Oncoprotein 18, Op18) (Phosphoprotein p19, pp19) (Prosolin) (Protein Pr22) (pp17)	STMN1 C1orf215 LAP18 OP18	1.67334	1.95217	1.8515		1
Q96HE7	ERO1A_HUMAN	ERO1-like protein alpha, ERO1-L, ERO1-L-alpha, EC 1.8.4.- (Endoplasmic oxidoreductin-1-like protein) (Endoplasmic reticulum oxidoreductase alpha) (Oxidoreductin-1-L-alpha)	ERO1A ERO1L UNQ434/PRO865	1.67112	1.982	1.45321		1
O43707	ACTN4_HUMAN	Alpha-actinin-4 (Non-muscle alpha-actinin 4)	ACTN4	1.66998	1.46338	1.61547		1
P62826	RAN_HUMAN	GTP-binding nuclear protein Ran, EC 3.6.5.- (Androgen receptor-associated protein 24) (GTPase Ran) (Ras-like protein TC4) (Ras-related nuclear protein)	RAN ARA24 OK/SW-cl.81	1.65729	1.64484	1.88363		1
Q10589	BST2_HUMAN	Bone marrow stromal antigen 2, BST-2 (HM1.24 antigen) (Tetherin) (CD antigen CD317)	BST2	1.65677	1.83334	1.64038		1
P28072	PSB6_HUMAN	Proteasome subunit beta type-6, EC 3.4.25.1 (Macropain delta chain) (Multicatalytic endopeptidase complex delta chain) (Proteasome delta chain) (Proteasome subunit Y)	PSMB6 LMPY Y	1.64806	1.75233	1.65842		1
Q8WTV0	SCRB1_HUMAN	Scavenger receptor class B member 1, SRB1 (CD36 and LIMPII analogous 1, CLA-1) (CD36 antigen-like 1) (Collagen type I receptor, thrombospondin receptor-like 1) (SR-BI) (CD antigen CD36)	SCARB1 CD36L1 CLA1	1.63237	1.7461	1.8412		1
P37235	HPCL1_HUMAN	Hippocalcin-like protein 1 (Calcium-binding protein BDR-1) (HLP2) (Visinin-like protein 3, VILIP-3)	HPCAL1 BDR1	1.63014	1.0808	1.03591		1
P57088	TMM33_HUMAN	Transmembrane protein 33 (Protein DB83) (SHINC-3)	TMEM33 DB83	1.61784	1.1043	1.01241		1
P26006	ITA3_HUMAN	Integrin alpha-3 (CD49 antigen-like family member C) (FRP-2) (Galactoprotein B3, GAPB3) (VLA-3 subunit alpha) (CD antigen CD49c) [Cleaved into: Integrin alpha-3 heavy chain; Integrin alpha-3 light chain ]	ITGA3 MSK18	1.60067	1.31999	1.13144		1
P82979	SARNP_HUMAN	SAP domain-containing ribonucleoprotein (Cytokine-induced protein of 29 kDa) (Nuclear protein Hcc-1) (Proliferation-associated cytokine-inducible protein CIP29)	SARNP HCC1 HSPC316	1.59294	1.24048	1.02024		1
Q9P2B2	FPRP_HUMAN	Prostaglandin F2 receptor negative regulator (CD9 partner 1, CD9P-1) (Glu-Trp-Ile EWI motif-containing protein F, EWI-F) (Prostaglandin F2-alpha receptor regulatory protein) (Prostaglandin F2-alpha receptor-associated protein) (CD antigen CD315)	PTGFRN CD9P1 EWIF FPRP KIAA1436	1.59038	1.92827	1.63871		1
P08174	DAF_HUMAN	Complement decay-accelerating factor (CD antigen CD55)	CD55 CR DAF	1.58337	2.1426	1.79306		1
O00487	PSDE_HUMAN	26S proteasome non-ATPase regulatory subunit 14, EC 3.4.19.- (26S proteasome regulatory subunit RPN11) (26S proteasome-associated PAD1 homolog 1)	PSMD14 POH1	1.57972	1.16261	1.23023		1
O14980	XPO1_HUMAN	Exportin-1, Exp1 (Chromosome region maintenance 1 protein homolog)	XPO1 CRM1	1.57578	1.09105	1.32625		1
Q8NFQ8	TOIP2_HUMAN	Torsin-1A-interacting protein 2 (Lumenal domain-like LAP1)	TOR1AIP2 IFRG15 LULL1	1.57511	1.16208	1.07304		1
Q5ZPR3	CD276_HUMAN	CD276 antigen (4Ig-B7-H3) (B7 homolog 3, B7-H3) (Costimulatory molecule) (CD antigen CD276)	CD276 B7H3 PSEC0249 UNQ309/PRO352	1.54433	1.76059	1.42877		1
Q9P000	COMD9_HUMAN	COMM domain-containing protein 9	COMMD9 HSPC166	1.54375	1.20494	1.48707		1
Q16270	IBP7_HUMAN	Insulin-like growth factor-binding protein 7, IBP-7, IGF-binding protein 7, IGFBP-7 (IGFBP-rP1) (MAC25 protein) (PGI2-stimulating factor) (Prostacyclin-stimulating factor) (Tumor-derived adhesion factor, TAF)	IGFBP7 MAC25 PSF	1.5336	1.29441	1.06427		1
Q16880	CGT_HUMAN	2-hydroxyacylsphingosine 1-beta-galactosyltransferase, EC 2.4.1.47 (Ceramide UDP-galactosyltransferase) (Cerebroside synthase) (UDP-galactose-ceramide galactosyltransferase)	UGT8 CGT UGT4	1.52906	1.16338	1.38104		1
Q9NPH3	IL1AP_HUMAN	Interleukin-1 receptor accessory protein, IL-1 receptor accessory protein, IL-1RAcP, EC 3.2.2.6 (Interleukin-1 receptor 3, IL-1R-3, IL-1R3)	IL1RAP C3orf13 IL1R3	1.52767	1.28008	1.50184		1
Q96TA1	NIBA2_HUMAN	Protein Niban 2 (Meg-3) (Melanoma invasion by ERK, MINERVA) (Niban-like protein 1) (Protein FAM129B)	NIBAN2 C9orf88 FAM129B	1.52625	1.06924	1.1337		1
Q07960	RHG01_HUMAN	Rho GTPase-activating protein 1 (CDC42 GTPase-activating protein) (GTPase-activating protein rhoGAP) (Rho-related small GTPase protein activator) (Rho-type GTPase-activating protein 1) (p50-RhoGAP)	ARHGAP1 CDC42GAP RHOGAP1	1.52278	1.41202	1.46645		1
Q9BSD7	NTPCR_HUMAN	Cancer-related nucleoside-triphosphatase, NTPase, EC 3.6.1.15 (Nucleoside triphosphate phosphohydrolase)	NTPCR C1orf57	1.5147	1.59954	1.73339		1
O14656	TOR1A_HUMAN	Torsin-1A (Dystonia 1 protein) (Torsin ATPase-1A, EC 3.6.4.-) (Torsin family 1 member A)	TOR1A DQ2 DYT1 TA TORA	1.48284	1.67513	1.30437		1
Q6P2C8	MED27_HUMAN	Mediator of RNA polymerase II transcription subunit 27 (Cofactor required for Sp1 transcriptional activation subunit 8, CRSP complex subunit 8) (Mediator complex subunit 27) (P37 TRAP/SMCC/PC2 subunit) (Transcriptional coactivator CRSP34)	MED27 CRSP34 CRSP8	1.47928	1.09458	1.00828		1
Q9BQE5	APOL2_HUMAN	Apolipoprotein L2 (Apolipoprotein L-II, ApoL-II)	APOL2	1.47251	1.04082	1.15457		1
O15160	RPAC1_HUMAN	DNA-directed RNA polymerases I and III subunit RPAC1, DNA-directed RNA polymerase I subunit C, RNA polymerases I and III subunit AC1 (AC40) (DNA-directed RNA polymerases I and III 40 kDa polypeptide, RPA40) (RPA39) (RPC40)	POLR1C POLR1E	1.46899	1.34621	1.45097		1
P55327	TPD52_HUMAN	Tumor protein D52 (Protein N8)	TPD52	1.46767	2.17547	1.47566		1
P51665	PSMD7_HUMAN	26S proteasome non-ATPase regulatory subunit 7 (26S proteasome regulatory subunit RPN8) (26S proteasome regulatory subunit S12) (Mov34 protein homolog) (Proteasome subunit p40)	PSMD7 MOV34L	1.46128	1.95245	1.71092		1
Q9NWS0	PIHD1_HUMAN	PIH1 domain-containing protein 1 (Nucleolar protein 17 homolog)	PIH1D1 NOP17	1.44938	1.02912	1.67824		1
Q96KA5	CLP1L_HUMAN	Cleft lip and palate transmembrane protein 1-like protein, CLPTM1-like protein (Cisplatin resistance-related protein 9, CRR9p)	CLPTM1L CRR9	1.44679	1.46877	1.18487		1
P62805	H4_HUMAN	Histone H4	H4C1 H4/A H4FA HIST1H4A; H4C2 H4/I H4FI HIST1H4B; H4C3 H4/G H4FG HIST1H4C; H4C4 H4/B H4FB HIST1H4D; H4C5 H4/J H4FJ HIST1H4E; H4C6 H4/C H4FC HIST1H4F; H4C8 H4/H H4FH HIST1H4H; H4C9 H4/M H4FM HIST1H4I; H4C11 H4/E H4FE HIST1H4J; H4C12 H4/D H4FD HIST1H4K; H4C13 H4/K H4FK HIST1H4L; H4C14 H4/N H4F2 H4FN HIST2H4 HIST2H4A; H4C15 H4/O H4FO HIST2H4B; H4-16 HIST4H4	1.44671	1.22348	1.06842		1
Q15758	AAAT_HUMAN	Neutral amino acid transporter B(0), ATB(0) (Baboon M7 virus receptor) (RD114/simian type D retrovirus receptor) (Sodium-dependent neutral amino acid transporter type 2) (Solute carrier family 1 member 5)	SLC1A5 ASCT2 M7V1 RDR RDRC	1.43806	1.68784	1.03085		1
P11117	PPAL_HUMAN	Lysosomal acid phosphatase, LAP, EC 3.1.3.2	ACP2	1.43563	1.08662	1.49753		1
Q9UHL4	DPP2_HUMAN	Dipeptidyl peptidase 2, EC 3.4.14.2 (Dipeptidyl aminopeptidase II) (Dipeptidyl peptidase 7) (Dipeptidyl peptidase II, DPP II) (Quiescent cell proline dipeptidase)	DPP7 DPP2 QPP	1.43072	1.59055	1.32094		1
P12814	ACTN1_HUMAN	Alpha-actinin-1 (Alpha-actinin cytoskeletal isoform) (F-actin cross-linking protein) (Non-muscle alpha-actinin-1)	ACTN1	1.42954	1.26375	1.54278		1
Q13619	CUL4A_HUMAN	Cullin-4A, CUL-4A	CUL4A	1.42447	1.10692	1.32447		1
P04062	GLCM_HUMAN	Lysosomal acid glucosylceramidase, Lysosomal acid GCase, EC 3.2.1.45 (Acid beta-glucosidase) (Alglucerase) (Beta-glucocerebrosidase, Beta-GC) (Cholesterol glucosyltransferase, SGTase, EC 2.4.1.-) (Cholesteryl-beta-glucosidase, EC 3.2.1.-) (D-glucosyl-N-acylsphingosine glucohydrolase) (Imiglucerase) (Lysosomal cholesterol glycosyltransferase) (Lysosomal galactosylceramidase, EC 3.2.1.46) (Lysosoma…	GBA GC GLUC	1.42083	1.6647	1.61053		1
O75955	FLOT1_HUMAN	Flotillin-1	FLOT1	1.40749	1.10083	1.24521		1
Q10472	GALT1_HUMAN	Polypeptide N-acetylgalactosaminyltransferase 1, EC 2.4.1.41 (Polypeptide GalNAc transferase 1, GalNAc-T1, pp-GaNTase 1) (Protein-UDP acetylgalactosaminyltransferase 1) (UDP-GalNAc:polypeptide N-acetylgalactosaminyltransferase 1) [Cleaved into: Polypeptide N-acetylgalactosaminyltransferase 1 soluble form ]	GALNT1	1.40472	1.26993	1.1678		1
P78310	CXAR_HUMAN	Coxsackievirus and adenovirus receptor, CAR, hCAR (CVB3-binding protein) (Coxsackievirus B-adenovirus receptor) (HCVADR)	CXADR CAR	1.39438	1.56154	1.39493		1
P07237	PDIA1_HUMAN	Protein disulfide-isomerase, PDI, EC 5.3.4.1 (Cellular thyroid hormone-binding protein) (Prolyl 4-hydroxylase subunit beta) (p55)	P4HB ERBA2L PDI PDIA1 PO4DB	1.39427	1.58205	1.47802		1
Q9Y639	NPTN_HUMAN	Neuroplastin (Stromal cell-derived receptor 1, SDR-1)	NPTN SDFR1 SDR1	1.39226	1.43494	1.49173		1
Q9NZL9	MAT2B_HUMAN	Methionine adenosyltransferase 2 subunit beta (Methionine adenosyltransferase II beta, MAT II beta) (Putative dTDP-4-keto-6-deoxy-D-glucose 4-reductase)	MAT2B TGR MSTP045 Nbla02999 UNQ2435/PRO4995	1.39026	1.1114	1.26088		1
Q9H6E4	CC134_HUMAN	Coiled-coil domain-containing protein 134	CCDC134	1.37237	1.2062	1.54202		1
P04843	RPN1_HUMAN	Dolichyl-diphosphooligosaccharide--protein glycosyltransferase subunit 1 (Dolichyl-diphosphooligosaccharide--protein glycosyltransferase 67 kDa subunit) (Ribophorin I, RPN-I) (Ribophorin-1)	RPN1	1.37209	1.37442	1.15031		1
P25787	PSA2_HUMAN	Proteasome subunit alpha type-2 (Macropain subunit C3) (Multicatalytic endopeptidase complex subunit C3) (Proteasome component C3)	PSMA2 HC3 PSC3	1.36967	1.22974	1.70287		1
P08648	ITA5_HUMAN	Integrin alpha-5 (CD49 antigen-like family member E) (Fibronectin receptor subunit alpha) (Integrin alpha-F) (VLA-5) (CD antigen CD49e) [Cleaved into: Integrin alpha-5 heavy chain; Integrin alpha-5 light chain ]	ITGA5 FNRA	1.36432	1.17666	1.12201		1
P19022	CADH2_HUMAN	Cadherin-2 (CDw325) (Neural cadherin, N-cadherin) (CD antigen CD325)	CDH2 CDHN NCAD	1.36381	1.51264	1.25819		1
Q969V3	NCLN_HUMAN	Nicalin (Nicastrin-like protein)	NCLN	1.36063	1.32778	1.49758		1
P78346	RPP30_HUMAN	Ribonuclease P protein subunit p30, RNaseP protein p30 (RNase P subunit 2)	RPP30 RNASEP2	1.34494	1.09099	1.15781		1
Q9NYU2	UGGG1_HUMAN	UDP-glucose:glycoprotein glucosyltransferase 1, UGT1, hUGT1, EC 2.4.1.- (UDP--Glc:glycoprotein glucosyltransferase) (UDP-glucose ceramide glucosyltransferase-like 1)	UGGT1 GT UGCGL1 UGGT UGT1 UGTR	1.33667	1.13226	1.20489		1
P59998	ARPC4_HUMAN	Actin-related protein 2/3 complex subunit 4 (Arp2/3 complex 20 kDa subunit, p20-ARC)	ARPC4 ARC20	1.3214	1.36765	1.27952		1
Q15404	RSU1_HUMAN	Ras suppressor protein 1, RSP-1, Rsu-1	RSU1 RSP1	1.31762	1.3568	1.34637		1
Q14997	PSME4_HUMAN	Proteasome activator complex subunit 4 (Proteasome activator PA200)	PSME4 KIAA0077	1.30761	1.31881	1.20436		1
P20645	MPRD_HUMAN	Cation-dependent mannose-6-phosphate receptor, CD Man-6-P receptor, CD-MPR (46 kDa mannose 6-phosphate receptor, MPR 46)	M6PR MPR46 MPRD	1.30254	1.61063	1.52751		1
Q8NBJ5	GT251_HUMAN	Procollagen galactosyltransferase 1, EC 2.4.1.50 (Collagen beta(1-O)galactosyltransferase 1, ColGalT 1) (Glycosyltransferase 25 family member 1) (Hydroxylysine galactosyltransferase 1)	COLGALT1 GLT25D1 PSEC0241	1.28471	1.19252	1.22758		1
P43121	MUC18_HUMAN	Cell surface glycoprotein MUC18 (Cell surface glycoprotein P1H12) (Melanoma cell adhesion molecule) (Melanoma-associated antigen A32) (Melanoma-associated antigen MUC18) (S-endo 1 endothelial-associated antigen) (CD antigen CD146)	MCAM MUC18	1.28417	1.64775	1.52101		1
O94766	B3GA3_HUMAN	Galactosylgalactosylxylosylprotein 3-beta-glucuronosyltransferase 3, EC 2.4.1.135 (Beta-1,3-glucuronyltransferase 3) (Glucuronosyltransferase I, GlcAT-I) (UDP-GlcUA:Gal beta-1,3-Gal-R glucuronyltransferase, GlcUAT-I)	B3GAT3	1.28037	1.1341	1.03641		1
P17813	EGLN_HUMAN	Endoglin (CD antigen CD105)	ENG END	1.24528	1.48321	1.21196		1
P18085	ARF4_HUMAN	ADP-ribosylation factor 4	ARF4 ARF2	1.23428	1.24316	1.22929		1
Q13596	SNX1_HUMAN	Sorting nexin-1	SNX1	1.22296	1.14881	1.07818		1
P10321	HLAC_HUMAN	HLA class I histocompatibility antigen, C alpha chain, HLA-C (HLA-Cw) (Human leukocyte antigen C)	HLA-C HLAC	1.21494	1.44791	1.17663		1
P05186	PPBT_HUMAN	Alkaline phosphatase, tissue-nonspecific isozyme, AP-TNAP, TNS-ALP, TNSALP, EC 3.1.3.1 (Alkaline phosphatase liver/bone/kidney isozyme) (Phosphoamidase) (Phosphocreatine phosphatase, EC 3.9.1.1)	ALPL	1.1994	1.39091	1.39365		1
Q13488	VPP3_HUMAN	V-type proton ATPase 116 kDa subunit a 3, V-ATPase 116 kDa subunit a 3 (Osteoclastic proton pump 116 kDa subunit, OC-116 kDa, OC116) (T-cell immune regulator 1) (T-cell immune response cDNA7 protein, TIRC7) (Vacuolar proton translocating ATPase 116 kDa subunit a isoform 3)	TCIRG1 ATP6N1C ATP6V0A3	1.19936	1.365	1.19927		1
P08865	RSSA_HUMAN	40S ribosomal protein SA (37 kDa laminin receptor precursor, 37LRP) (37/67 kDa laminin receptor, LRP/LR) (67 kDa laminin receptor, 67LR) (Colon carcinoma laminin-binding protein) (Laminin receptor 1, LamR) (Laminin-binding protein precursor p40, LBP/p40) (Multidrug resistance-associated protein MGr1-Ag) (NEM/1CHD4) (Small ribosomal subunit protein uS2)	RPSA LAMBR LAMR1	1.19295	1.49517	1.40654		1
O00231	PSD11_HUMAN	26S proteasome non-ATPase regulatory subunit 11 (26S proteasome regulatory subunit RPN6) (26S proteasome regulatory subunit S9) (26S proteasome regulatory subunit p44.5)	PSMD11	1.18062	1.09504	1.06126		1
Q9UBV2	SE1L1_HUMAN	Protein sel-1 homolog 1 (Suppressor of lin-12-like protein 1, Sel-1L)	SEL1L TSA305 UNQ128/PRO1063	1.17627	1.53217	1.23235		1
Q9BRT9	SLD5_HUMAN	DNA replication complex GINS protein SLD5 (GINS complex subunit 4) [Cleaved into: DNA replication complex GINS protein SLD5, N-terminally processed ]	GINS4 SLD5	1.16791	1.35202	1.35774		1
Q9H5V8	CDCP1_HUMAN	CUB domain-containing protein 1 (Membrane glycoprotein gp140) (Subtractive immunization M plus HEp3-associated 135 kDa protein, SIMA135) (Transmembrane and associated with src kinases) (CD antigen CD318)	CDCP1 TRASK UNQ2486/PRO5773	1.16696	1.02483	1.21062		1
Q9Y5K5	UCHL5_HUMAN	Ubiquitin carboxyl-terminal hydrolase isozyme L5, UCH-L5, EC 3.4.19.12 (Ubiquitin C-terminal hydrolase UCH37) (Ubiquitin thioesterase L5)	UCHL5 UCH37 AD-019 CGI-70	1.16653	1.08875	1.16819		1
P61923	COPZ1_HUMAN	Coatomer subunit zeta-1 (Zeta-1-coat protein, Zeta-1 COP)	COPZ1 COPZ CGI-120 HSPC181	1.14882	1.3477	1.13139		1
Q9P0L0	VAPA_HUMAN	Vesicle-associated membrane protein-associated protein A, VAMP-A, VAMP-associated protein A, VAP-A (33 kDa VAMP-associated protein, VAP-33)	VAPA VAP33	1.14526	1.54145	1.24294		1
Q53FA7	QORX_HUMAN	Quinone oxidoreductase PIG3, EC 1.6.5.5 (NADPH:quinone reductase PIG3) (Tumor protein p53-inducible protein 3, Protein PIG3) (p53-induced gene 3 protein)	TP53I3 PIG3	1.14346	1.28904	1.05132		1
Q6UVK1	CSPG4_HUMAN	Chondroitin sulfate proteoglycan 4 (Chondroitin sulfate proteoglycan NG2) (Melanoma chondroitin sulfate proteoglycan) (Melanoma-associated chondroitin sulfate proteoglycan)	CSPG4 MCSP	1.14214	1.18404	1.4124		1
Q07065	CKAP4_HUMAN	Cytoskeleton-associated protein 4 (63-kDa cytoskeleton-linking membrane protein, Climp-63, p63)	CKAP4	1.14168	1.20919	1.23582		1
P68400	CSK21_HUMAN	Casein kinase II subunit alpha, CK II alpha, EC 2.7.11.1	CSNK2A1 CK2A1	1.14086	1.22766	1.10816		1
Q9Y3D0	CIA2B_HUMAN	Cytosolic iron-sulfur assembly component 2B (MSS19-interacting protein of 18 kDa) (Mitotic spindle-associated MMXD complex subunit MIP18) (Protein FAM96B)	CIAO2B CIAB FAM96B MIP18 CGI-128 HSPC118	1.13982	1.19989	1.64288		1
Q9GZS3	WDR61_HUMAN	WD repeat-containing protein 61 (Meiotic recombination REC14 protein homolog) (SKI8 homolog, Ski8) [Cleaved into: WD repeat-containing protein 61, N-terminally processed ]	WDR61	1.12306	1.00345	1.70673		1
P43353	AL3B1_HUMAN	Aldehyde dehydrogenase family 3 member B1, EC 1.2.1.28, EC 1.2.1.5, EC 1.2.1.7 (Aldehyde dehydrogenase 7)	ALDH3B1 ALDH7	1.12184	1.48321	1.04927		1
P05362	ICAM1_HUMAN	Intercellular adhesion molecule 1, ICAM-1 (Major group rhinovirus receptor) (CD antigen CD54)	ICAM1	1.12007	1.39558	1.31105		1
Q9UBI1	COMD3_HUMAN	COMM domain-containing protein 3 (Protein Bup) (Protein PIL)	COMMD3 BUP C10orf8	1.10935	1.38078	1.01299		1
P62906	RL10A_HUMAN	60S ribosomal protein L10a (CSA-19) (Large ribosomal subunit protein uL1) (Neural precursor cell expressed developmentally down-regulated protein 6, NEDD-6)	RPL10A NEDD6	1.1069	1.05259	1.4605		1
O43402	EMC8_HUMAN	ER membrane protein complex subunit 8 (Neighbor of COX4) (Protein FAM158B)	EMC8 C16orf2 C16orf4 COX4AL COX4NB FAM158B NOC4	1.10264	1.13304	1.15711		1
P32004	L1CAM_HUMAN	Neural cell adhesion molecule L1, N-CAM-L1, NCAM-L1 (CD antigen CD171)	L1CAM CAML1 MIC5	1.02416	1.22389	1.00597		1
P52209	6PGD_HUMAN	6-phosphogluconate dehydrogenase, decarboxylating, EC 1.1.1.44	PGD PGDH	1.00646	1.01912	1.06308		1
O43414	ERI3_HUMAN	ERI1 exoribonuclease 3, EC 3.1.-.- (Prion interactor 1) (Prion protein-interacting protein)	ERI3 PINT1 PRNPIP PRNPIP1	1.6351	1.40063	2.08114			1

## Sheet: Huh7-R cells
Mitochondrial proteome Identification and quantification of sorafenib-resistant Huh7 (Huh7-R) cells
Uniprot Accession	Entry Name	Protein names	Gene Names	Rep1-Log2ratio(+hv/-hv)	Rep2-Log2ratio(+hv/-hv)	Rep3-Log2ratio(+hv/-hv)	Rep1-ratio(Huh7-R/Huh7)	Rep2-ratio(Huh7-R/Huh7)	Rep3-ratio(Huh7-R/Huh7)	Log1.5-Average-ratio(Huh7-R/Huh7)	Localization			Evidence for mito	Sublocalization
											Mitochondria	Others	Un-assigned		Matrix	MIM	MOM	IMS	Unclassified
Q9Y399	RT02_HUMAN	28S ribosomal protein S2, mitochondrial, MRP-S2, S2mt (Mitochondrial small ribosomal subunit protein uS2m)	MRPS2 CGI-91	2.35586	2.37885	2.46447	3.354	2.76385	3.26615	2.81256	1			MitoCarta3.0, GOCC	1	1
O94925	GLSK_HUMAN	Glutaminase kidney isoform, mitochondrial, GLS, EC 3.5.1.2 (K-glutaminase) (L-glutamine amidohydrolase) [Cleaved into: Glutaminase kidney isoform, mitochondrial 68 kDa chain; Glutaminase kidney isoform, mitochondrial 65 kDa chain ]	GLS GLS1 KIAA0838	2.21172	2.33744	2.34897	2.07136	1.8406	1.93082	1.64402	1			MitoCarta3.0, GOCC	1	1
Q10713	MPPA_HUMAN	Mitochondrial-processing peptidase subunit alpha (Alpha-MPP) (Inactive zinc metalloprotease alpha) (P-55)	PMPCA INPP5E KIAA0123 MPPA	1.98334	1.89896	2.34277	2.26572	1.52103	2.43097	1.79742	1			MitoCarta3.0, GOCC	1	1
O75439	MPPB_HUMAN	Mitochondrial-processing peptidase subunit beta, EC 3.4.24.64 (Beta-MPP) (P-52)	PMPCB MPPB	1.95794	1.60342	1.66669	1.3743	1.34699	1.36175	0.760187	1			MitoCarta3.0, GOCC	1	1
O15091	MRPP3_HUMAN	Mitochondrial ribonuclease P catalytic subunit, EC 3.1.26.5 (Mitochondrial ribonuclease P protein 3, Mitochondrial RNase P protein 3) (Protein only RNase P catalytic subunit)	PRORP KIAA0391 MRPP3	1.82265	2.02069	2.07292	1.03772	0.979964	1.0409	0.0476974	1			MitoCarta3.0, GOCC	1
Q9Y2Q3	GSTK1_HUMAN	Glutathione S-transferase kappa 1, EC 2.5.1.18 (GST 13-13) (GST class-kappa) (GSTK1-1, hGSTK1) (Glutathione S-transferase subunit 13)	GSTK1 HDCMD47P	1.71084	1.15808	1.64557	0.741992	0.440573	0.540136	-1.36811	1			MitoCarta3.0, GOCC	1
Q12931	TRAP1_HUMAN	Heat shock protein 75 kDa, mitochondrial, HSP 75 (TNFR-associated protein 1) (Tumor necrosis factor type 1 receptor-associated protein, TRAP-1)	TRAP1 HSP75	1.69962	1.50955	1.81305	1.20043	1.24062	1.28211	0.532632	1			MitoCarta3.0, GOCC	1	1		1
Q02218	ODO1_HUMAN	2-oxoglutarate dehydrogenase complex component E1, E1o, OGDC-E1, OGDH-E1, EC 1.2.4.2 (2-oxoglutarate dehydrogenase, mitochondrial) (Alpha-ketoglutarate dehydrogenase, Alpha-KGDH-E1) (Thiamine diphosphate (ThDP)-dependent 2-oxoglutarate dehydrogenase)	OGDH	1.65918	1.52134	1.54902	2.81477	2.58848	2.37502	2.3497	1			MitoCarta3.0, GOCC	1
Q9H857	NT5D2_HUMAN	5'-nucleotidase domain-containing protein 2, EC 3.1.3.-	NT5DC2	1.65841	2.35007	2.02027	1.37414	1.36488	1.62239	0.922848	1			MitoCarta3.0	1
Q96I51	RCC1L_HUMAN	RCC1-like G exchanging factor-like protein, RCC1-like (Williams-Beuren syndrome chromosomal region 16 protein)	RCC1L WBSCR16	1.63916	1.62231	1.22688	1.90333	1.76912	1.80791	1.48609	1			MitoCarta3.0, GOCC	1	1
P36776	LONM_HUMAN	Lon protease homolog, mitochondrial, EC 3.4.21.53 (LONHs) (Lon protease-like protein, LONP) (Mitochondrial ATP-dependent protease Lon) (Serine protease 15)	LONP1 PRSS15	1.63849	1.62996	1.79622	1.51077	1.39122	1.55633	0.97705	1			MitoCarta3.0, GOCC	1
P49748	ACADV_HUMAN	Very long-chain specific acyl-CoA dehydrogenase, mitochondrial, VLCAD, EC 1.3.8.9	ACADVL VLCAD	1.59234	1.93601	1.785	5.74338	6.26239	4.5832	4.21769	1			MitoCarta3.0, GOCC	1	1
P23368	MAOM_HUMAN	NAD-dependent malic enzyme, mitochondrial, NAD-ME, EC 1.1.1.38 (Malic enzyme 2)	ME2	1.56669	1.38493	1.96215	1.29095	1.34175	1.35459	0.701668	1			MitoCarta3.0, GOCC	1
Q6UB35	C1TM_HUMAN	Monofunctional C1-tetrahydrofolate synthase, mitochondrial, EC 6.3.4.3 (Formyltetrahydrofolate synthetase)	MTHFD1L FTHFSDC1	1.54354	1.2521	1.55353	1.2948	1.13363	1.41346	0.610043	1			MitoCarta3.0, GOCC	1
Q969Y2	GTPB3_HUMAN	tRNA modification GTPase GTPBP3, mitochondrial (GTP-binding protein 3) (Mitochondrial GTP-binding protein 1)	GTPBP3 MTGP1	1.53051	1.0816	1.07642	1.33034	1.25573	0.930135	0.391576	1			MitoCarta3.0, GOCC	1
P11177	ODPB_HUMAN	Pyruvate dehydrogenase E1 component subunit beta, mitochondrial, PDHE1-B, EC 1.2.4.1	PDHB PHE1B	1.5156	1.45026	1.61164	1.06268	0.981693	0.986371	0.0251497	1			MitoCarta3.0, GOCC	1
P42704	LPPRC_HUMAN	Leucine-rich PPR motif-containing protein, mitochondrial (130 kDa leucine-rich protein, LRP 130) (GP130)	LRPPRC LRP130	1.50197	1.5403	1.59337	1.93867	1.88752	1.94539	1.61378	1			MitoCarta3.0, GOCC	1
Q9BRJ2	RM45_HUMAN	39S ribosomal protein L45, mitochondrial, L45mt, MRP-L45 (Mitochondrial large ribosomal subunit protein mL45)	MRPL45	1.49445	2.25031	1.6038	1.1796	1.38309	1.09302	0.487531	1			GOCC		1
Q6L8Q7	PDE12_HUMAN	2',5'-phosphodiesterase 12, 2'-PDE, 2-PDE, EC 3.1.4.- (Mitochondrial deadenylase, EC 3.1.13.4)	PDE12	1.49078	1.39652	1.01846	1.31308	1.28125	1.58594	0.818226	1			MitoCarta3.0, GOCC	1
Q9NSE4	SYIM_HUMAN	Isoleucine--tRNA ligase, mitochondrial, EC 6.1.1.5 (Isoleucyl-tRNA synthetase, IleRS)	IARS2	1.48789	1.62114	1.39863	2.16652	2.05003	1.96572	1.78331	1			MitoCarta3.0, GOCC	1
Q9H845	ACAD9_HUMAN	Complex I assembly factor ACAD9, mitochondrial (Acyl-CoA dehydrogenase family member 9, ACAD-9, EC 1.3.8.-)	ACAD9	1.44444	1.75591	1.94431	1.40275	1.84996	1.51319	1.14159	1			MitoCarta3.0, GOCC		1
P54886	P5CS_HUMAN	Delta-1-pyrroline-5-carboxylate synthase, P5CS (Aldehyde dehydrogenase family 18 member A1) [Includes: Glutamate 5-kinase, GK, EC 2.7.2.11 (Gamma-glutamyl kinase); Gamma-glutamyl phosphate reductase, GPR, EC 1.2.1.41 (Glutamate-5-semialdehyde dehydrogenase) (Glutamyl-gamma-semialdehyde dehydrogenase) ]	ALDH18A1 GSAS P5CS PYCS	1.43619	1.33053	1.4212	0.648903	0.655808	0.606807	-1.1116	1			MitoCarta3.0, GOCC	1	1
P31327	CPSM_HUMAN	Carbamoyl-phosphate synthase [ammonia], mitochondrial, EC 6.3.4.16 (Carbamoyl-phosphate synthetase I, CPSase I)	CPS1	1.42639	1.51484	1.45701	6.60217	7.09762	7.0026	4.764	1			MitoCarta3.0, GOCC	1	1
P51398	RT29_HUMAN	28S ribosomal protein S29, mitochondrial, MRP-S29, S29mt (Death-associated protein 3, DAP-3) (Ionizing radiation resistance conferring protein) (Mitochondrial small ribosomal subunit protein mS29)	DAP3 MRPS29	1.4184	1.23658	1.64547	1.15876	1.06089	1.12719	0.269827	1			MitoCarta3.0, GOCC	1	1
Q9BW92	SYTM_HUMAN	Threonine--tRNA ligase, mitochondrial, EC 6.1.1.3 (Threonyl-tRNA synthetase, ThrRS) (Threonyl-tRNA synthetase-like 1)	TARS2 TARSL1	1.40639	2.06261	1.30016	0.760953	0.885895	0.870049	-0.433047	1			MitoCarta3.0, GOCC	1
Q13405	RM49_HUMAN	39S ribosomal protein L49, mitochondrial, L49mt, MRP-L49 (Mitochondrial large ribosomal subunit protein mL49) (Neighbor of FAU, NOF) (Protein NOF1)	MRPL49 C11orf4 NOF1 OK/SW-cl.67	1.36549	2.17124	1.88787	0.671651	0.591188	0.670417	-1.08371	1			MitoCarta3.0, GOCC	1	1
Q9UIJ7	KAD3_HUMAN	GTP:AMP phosphotransferase AK3, mitochondrial, EC 2.7.4.10 (Adenylate kinase 3, AK 3) (Adenylate kinase 3 alpha-like 1)	AK3 AK3L1 AK6 AKL3L	1.35517	1.24661	1.27884	0.826779	0.710061	0.627	-0.80581	1			MitoCarta3.0, GOCC	1
P31930	QCR1_HUMAN	Cytochrome b-c1 complex subunit 1, mitochondrial (Complex III subunit 1) (Core protein I) (Ubiquinol-cytochrome-c reductase complex core protein 1)	UQCRC1	1.35361	1.31806	1.56522	0.969278	0.929917	0.971484	-0.108674	1			MitoCarta3.0, GOCC		1
P48047	ATPO_HUMAN	ATP synthase subunit O, mitochondrial (ATP synthase peripheral stalk subunit OSCP) (Oligomycin sensitivity conferral protein, OSCP)	ATP5PO ATP5O ATPO	1.30925	1.17929	1.1979	1.46224	1.23913	1.23359	0.669079	1			MitoCarta3.0, GOCC		1
O14874	BCKD_HUMAN	[3-methyl-2-oxobutanoate dehydrogenase [lipoamide]] kinase, mitochondrial, EC 2.7.11.4 (Branched-chain alpha-ketoacid dehydrogenase kinase, BCKD-kinase, BCKDHKIN)	BCKDK	1.30376	1.24752	1.41847	0.977516	0.929756	1.05269	-0.0331349	1			MitoCarta3.0, GOCC	1
P52815	RM12_HUMAN	39S ribosomal protein L12, mitochondrial, L12mt, MRP-L12 (5c5-2) (Mitochondrial large ribosomal subunit protein bL12m)	MRPL12 MRPL7 RPML12	1.30262	1.68822	1.43804	0.402182	0.432064	0.46226	-2.06908	1			MitoCarta3.0, GOCC	1	1
P06576	ATPB_HUMAN	ATP synthase subunit beta, mitochondrial, EC 7.1.2.2 (ATP synthase F1 subunit beta)	ATP5F1B ATP5B ATPMB ATPSB	1.27363	1.21386	1.27687	0.787488	0.739868	0.738626	-0.692055	1			MitoCarta3.0, GOCC	1	1
O75390	CISY_HUMAN	Citrate synthase, mitochondrial, EC 2.3.3.1 (Citrate (Si)-synthase)	CS	1.27207	1.24364	1.38048	0.74254	0.722563	0.820176	-0.671141	1			MitoCarta3.0, GOCC	1
P09622	DLDH_HUMAN	Dihydrolipoyl dehydrogenase, mitochondrial, EC 1.8.1.4 (Dihydrolipoamide dehydrogenase) (Glycine cleavage system L protein)	DLD GCSL LAD PHE3	1.26928	1.45016	1.26639	0.985698	0.982565	1.0042	-0.0227441	1			MitoCarta3.0, GOCC	1
Q13011	ECH1_HUMAN	Delta(3,5)-Delta(2,4)-dienoyl-CoA isomerase, mitochondrial, EC 5.3.3.-	ECH1	1.25769	1.34124	1.44856	1.2771	1.34135	1.25148	0.627979	1			MitoCarta3.0, GOCC	1
Q96EK5	KBP_HUMAN	KIF-binding protein (KIF1-binding protein) (Kinesin family binding protein)	KIFBP KBP KIAA1279 KIF1BP	1.24624	1.30304	1.36687	1.57837	2.39077	2.50531	1.89721	1			GOCC					1
Q07021	C1QBP_HUMAN	Complement component 1 Q subcomponent-binding protein, mitochondrial (ASF/SF2-associated protein p32) (Glycoprotein gC1qBP, C1qBP) (Hyaluronan-binding protein 1) (Mitochondrial matrix protein p32) (gC1q-R protein) (p33, SF2AP32)	C1QBP GC1QBP HABP1 SF2P32	1.21125	1.20543	1.37718	0.523043	0.487541	0.493966	-1.70205	1			MitoCarta3.0, GOCC	1
P00403	COX2_HUMAN	Cytochrome c oxidase subunit 2, EC 7.1.1.9 (Cytochrome c oxidase polypeptide II)	MT-CO2 COII COX2 COXII MTCO2	1.18888	1.16608	1.6814	1.88846	1.64755	1.87991	1.45692	1			MitoCarta3.0, GOCC		1
Q99798	ACON_HUMAN	Aconitate hydratase, mitochondrial, Aconitase, EC 4.2.1.3 (Citrate hydro-lyase)	ACO2	1.14966	1.09973	1.16324	0.932264	0.894183	0.944115	-0.196224	1			MitoCarta3.0, GOCC	1
Q9NYY8	FAKD2_HUMAN	FAST kinase domain-containing protein 2, mitochondrial	FASTKD2 KIAA0971	1.11805	1.06417	1.40832	1.56099	1.37517	1.50747	0.96891	1			MitoCarta3.0, GOCC	1
Q16891	MIC60_HUMAN	MICOS complex subunit MIC60 (Cell proliferation-inducing gene 4/52 protein) (Mitochondrial inner membrane protein) (Mitofilin) (p87/89)	IMMT HMP MIC60 MINOS2 PIG4 PIG52	1.10874	1.16094	1.16275	0.91228	0.889562	0.953653	-0.209673	1			MitoCarta3.0, GOCC		1		1
O95571	ETHE1_HUMAN	Persulfide dioxygenase ETHE1, mitochondrial, EC 1.13.11.18 (Ethylmalonic encephalopathy protein 1) (Hepatoma subtracted clone one protein) (Sulfur dioxygenase ETHE1)	ETHE1 HSCO	1.08544	1.13815	1.22972	2.05094	1.87048	2.14654	1.73729	1			MitoCarta3.0, GOCC	1
Q9Y697	NFS1_HUMAN	Cysteine desulfurase, mitochondrial, EC 2.8.1.7	NFS1 NIFS HUSSY-08	1.05617	1.5196	1.04525	2.04819	2.18776	2.05847	1.82766	1			MitoCarta3.0, GOCC	1
Q9BYN8	RT26_HUMAN	28S ribosomal protein S26, mitochondrial, MRP-S26, S26mt (28S ribosomal protein S13, mitochondrial, MRP-S13, S13mt) (Mitochondrial small ribosomal subunit protein mS26)	MRPS26 C20orf193 RPMS13	2.20116	2.1371	0.754548	0.398116	0.340202	0.357494	-2.48386	1			MitoCarta3.0, GOCC	1	1
P27144	KAD4_HUMAN	Adenylate kinase 4, mitochondrial, AK 4, EC 2.7.4.10, EC 2.7.4.6 (Adenylate kinase 3-like) (GTP:AMP phosphotransferase AK4)	AK4 AK3 AK3L1	1.99084	1.99722		0.232682	0.36866		-2.96386	1			MitoCarta3.0, GOCC	1
Q8IYB8	SUV3_HUMAN	ATP-dependent RNA helicase SUPV3L1, mitochondrial, EC 3.6.4.13 (Suppressor of var1 3-like protein 1, SUV3-like protein 1)	SUPV3L1 SUV3	1.98427	1.93775	0.920945	2.4264	1.64562	1.40235	1.4834	1			MitoCarta3.0, GOCC	1
Q01664	TFAP4_HUMAN	Transcription factor AP-4 (Activating enhancer-binding protein 4) (Class C basic helix-loop-helix protein 41, bHLHc41)	TFAP4 BHLHC41	1.70454	1.25003		0.71796	0.712084		-0.827302	1			GOCC					1
Q9NVV4	PAPD1_HUMAN	Poly(A) RNA polymerase, mitochondrial, PAP, EC 2.7.7.19 (PAP-associated domain-containing protein 1) (Polynucleotide adenylyltransferase) (Terminal uridylyltransferase 1, TUTase 1) (mtPAP)	MTPAP PAPD1	1.64272	1.12925		1.80317	1.69387	0.931584	0.960564	1			MitoCarta3.0, GOCC	1
Q15031	SYLM_HUMAN	Leucine--tRNA ligase, mitochondrial, EC 6.1.1.4 (Leucyl-tRNA synthetase, LeuRS)	LARS2 KIAA0028	1.57262	1.66212	0.75377	0.952671	1.0897	1.1981	0.190169	1			MitoCarta3.0, GOCC	1
P30048	PRDX3_HUMAN	Thioredoxin-dependent peroxide reductase, mitochondrial, EC 1.11.1.24 (Antioxidant protein 1, AOP-1) (HBC189) (Peroxiredoxin III, Prx-III) (Peroxiredoxin-3) (Protein MER5 homolog) (Thioredoxin-dependent peroxiredoxin 3)	PRDX3 AOP1	1.41163	1.4153	0.656056	0.728987	0.675477	0.590947	-1.00566	1			MitoCarta3.0, GOCC	1
O95140	MFN2_HUMAN	Mitofusin-2, EC 3.6.5.- (Transmembrane GTPase MFN2)	MFN2 CPRP1 KIAA0214	1.40155	1.71984		2.01875	2.32798		1.91453	1			MitoCarta3.0, GOCC			1
Q9Y276	BCS1_HUMAN	Mitochondrial chaperone BCS1, h-BCS1 (BCS1-like protein)	BCS1L BCS1	1.36421	1.01612		1.50938	1.60676		1.09367	1			MitoCarta3.0, GOCC		1
P49590	SYHM_HUMAN	Histidine--tRNA ligase, mitochondrial, EC 6.1.1.21 (Histidine--tRNA ligase-like) (Histidyl-tRNA synthetase, HisRS)	HARS2 HARSL HARSR HO3	1.35214	1.33317	0.65544	2.73042	1.91721	1.83798	1.90145	1			MitoCarta3.0, GOCC	1
P04181	OAT_HUMAN	Ornithine aminotransferase, mitochondrial, EC 2.6.1.13 (Ornithine delta-aminotransferase) (Ornithine--oxo-acid aminotransferase) [Cleaved into: Ornithine aminotransferase, hepatic form; Ornithine aminotransferase, renal form ]	OAT	1.33684	1.99932	0.872812	0.434388	0.567697	0.478523	-1.74161	1			MitoCarta3.0, GOCC	1
Q5T9A4	ATD3B_HUMAN	ATPase family AAA domain-containing protein 3B (AAA-TOB3)	ATAD3B KIAA1273 TOB3	1.32335	1.28984	0.437062	0.785871	0.559196	0.701987	-0.942647	1			MitoCarta3.0, GOCC		1
P06493	CDK1_HUMAN	Cyclin-dependent kinase 1, CDK1, EC 2.7.11.22, EC 2.7.11.23 (Cell division control protein 2 homolog) (Cell division protein kinase 1) (p34 protein kinase)	CDK1 CDC2 CDC28A CDKN1 P34CDC2	1.25051	1.73998	0.891979	1.66758	3.33137	1.56943	1.93273	1			GOCC					1
Q9NVI7	ATD3A_HUMAN	ATPase family AAA domain-containing protein 3A	ATAD3A	1.21255	1.59763	0.906092	0.780611	0.685495	0.707922	-0.794225	1			MitoCarta3.0, GOCC		1
P40939	ECHA_HUMAN	Trifunctional enzyme subunit alpha, mitochondrial (78 kDa gastrin-binding protein) (Monolysocardiolipin acyltransferase, EC 2.3.1.-) (TP-alpha) [Includes: Long-chain enoyl-CoA hydratase, EC 4.2.1.17; Long chain 3-hydroxyacyl-CoA dehydrogenase, EC 1.1.1.211 ]	HADHA HADH	1.17955	1.31011	0.93414	0.971235	0.920943	0.912992	-0.165609	1			MitoCarta3.0, GOCC		1
Q5JTZ9	SYAM_HUMAN	Alanine--tRNA ligase, mitochondrial, EC 6.1.1.7 (Alanyl-tRNA synthetase, AlaRS)	AARS2 AARSL KIAA1270	1.16182	1.34483	0.878032	1.08658	1.01959	0.964374	0.0573223	1			MitoCarta3.0, GOCC	1
O14880	MGST3_HUMAN	Microsomal glutathione S-transferase 3, Microsomal GST-3 (Glutathione peroxidase MGST3, EC 1.11.1.-) (LTC4 synthase MGST3, EC 4.4.1.20) (Microsomal glutathione S-transferase III, Microsomal GST-III)	MGST3	1.14335	1.13358	0.791961	3.28615	2.89274	2.19913	2.53289	1			MitoCarta3.0			1
Q8NC60	NOA1_HUMAN	Nitric oxide-associated protein 1	NOA1 C4orf14	1.00696	1.06732	0.921513	1.29032	1.0552	1.20062	0.41248	1			MitoCarta3.0, GOCC		1
O95299	NDUAA_HUMAN	NADH dehydrogenase [ubiquinone] 1 alpha subcomplex subunit 10, mitochondrial (Complex I-42kD, CI-42kD) (NADH-ubiquinone oxidoreductase 42 kDa subunit)	NDUFA10	2.81405	0.115815	3.10926	0.984829	0.80792	5.39962	2.15656	1			MitoCarta3.0, GOCC	1	1
P52789	HXK2_HUMAN	Hexokinase-2, EC 2.7.1.1 (Hexokinase type II, HK II) (Hexokinase-B) (Muscle form hexokinase)	HK2	1.42645	0.87682	1.36862	2.56168	2.17357	3.00367	2.3372	1			GOCC			1
P50213	IDH3A_HUMAN	Isocitrate dehydrogenase [NAD] subunit alpha, mitochondrial, EC 1.1.1.41 (Isocitric dehydrogenase subunit alpha) (NAD(+)-specific ICDH subunit alpha)	IDH3A	1.35959	0.906773	1.72116	0.646991	0.695331	0.721241	-0.922837	1			MitoCarta3.0, GOCC	1
Q15046	SYK_HUMAN	Lysine--tRNA ligase, EC 2.7.7.-, EC 6.1.1.6 (Lysyl-tRNA synthetase, LysRS)	KARS1 KARS KIAA0070	1.31893	0.677639	1.22913	2.02987	1.76521	1.69982	1.49263	1			MitoCarta3.0, GOCC	1
O60313	OPA1_HUMAN	Dynamin-like 120 kDa protein, mitochondrial, EC 3.6.5.5 (Optic atrophy protein 1) [Cleaved into: Dynamin-like 120 kDa protein, form S1 ]	OPA1 KIAA0567	1.29111	0.468111	1.15273	1.05715	0.862831	0.934923	-0.122269	1			MitoCarta3.0, GOCC		1	1	1
Q7L8L6	FAKD5_HUMAN	FAST kinase domain-containing protein 5, mitochondrial	FASTKD5 KIAA1792	1.2839		1.99494	1.14945		1.04467	0.228462	1			MitoCarta3.0, GOCC, PubMed: 20869947	1
O75616	ERAL1_HUMAN	GTPase Era, mitochondrial, H-ERA, hERA (Conserved ERA-like GTPase, CEGA) (ERA-W) (ERA-like protein 1)	ERAL1 HERA	1.27098	0.936055	1.03182	0.840575	0.83512	0.98656	-0.294572	1			MitoCarta3.0, GOCC, PubMed: 20604745	1	1
Q9Y305	ACOT9_HUMAN	Acyl-coenzyme A thioesterase 9, mitochondrial, Acyl-CoA thioesterase 9, EC 3.1.2.- (Acyl-CoA thioester hydrolase 9)	ACOT9 CGI-16	1.23848	0.814559	1.31233	2.57282	1.93404	2.26485	2.00792	1			MitoCarta3.0, GOCC	1	1
Q9H7Z7	PGES2_HUMAN	Prostaglandin E synthase 2, EC 5.3.99.3 (Membrane-associated prostaglandin E synthase-2, mPGE synthase-2) (Microsomal prostaglandin E synthase 2, mPGES-2) (Prostaglandin-H(2) E-isomerase) [Cleaved into: Prostaglandin E synthase 2 truncated form ]	PTGES2 C9orf15 PGES2	1.19002	0.821592	1.83343	1.10583	0.829135	1.23826	0.138447	1			MitoCarta3.0, GOCC		1
Q9HA77	SYCM_HUMAN	Probable cysteine--tRNA ligase, mitochondrial, EC 6.1.1.16 (Cysteinyl-tRNA synthetase, CysRS)	CARS2 OK/SW-cl.10	1.15262	0.866136	2.74884	1.41444	1.51152	1.73113	1.08463	1			MitoCarta3.0, GOCC	1
Q9BZE1	RM37_HUMAN	39S ribosomal protein L37, mitochondrial, L37mt, MRP-L37 (39S ribosomal protein L2, mitochondrial, L2mt, MRP-L2) (Mitochondrial large ribosomal subunit protein mL37)	MRPL37 MRPL2 RPML2 HSPC235	1.13935	0.855529	1.08991	1.36415	1.58677	1.71237	1.08791	1			MitoCarta3.0, GOCC	1	1
Q96RP9	EFGM_HUMAN	Elongation factor G, mitochondrial, EF-Gmt (Elongation factor G 1, mitochondrial, mEF-G 1) (Elongation factor G1, hEFG1)	GFM1 EFG EFG1 GFM	1.09902	0.980484	1.34318	1.64012	1.48005	1.65473	1.14624	1			MitoCarta3.0, GOCC	1
Q8NBN7	RDH13_HUMAN	Retinol dehydrogenase 13, EC 1.1.1.300 (Short chain dehydrogenase/reductase family 7C member 3)	RDH13 SDR7C3 PSEC0082 UNQ736/PRO1430	1.03653	0.91652	1.51999	0.654789	0.618919	0.612837	-1.14403	1			MitoCarta3.0, GOCC		1
Q9NUJ1	ABHDA_HUMAN	Palmitoyl-protein thioesterase ABHD10, mitochondrial, EC 3.1.2.22 (Acyl-protein thioesterase ABHD10) (Alpha/beta hydrolase domain-containing protein 10, Abhydrolase domain-containing protein 10) (Mycophenolic acid acyl-glucuronide esterase, mitochondrial, EC 3.1.1.93)	ABHD10	0.410508	3.05172	2.54123	0.831458	0.826281	0.918972	-0.375121	1			MitoCarta3.0, GOCC	1
P13073	COX41_HUMAN	Cytochrome c oxidase subunit 4 isoform 1, mitochondrial (Cytochrome c oxidase polypeptide IV) (Cytochrome c oxidase subunit IV isoform 1, COX IV-1)	COX4I1 COX4	0.86582	1.95413	1.79624	0.725963	0.663786	0.687273	-0.906805	1			MitoCarta3.0, GOCC		1
Q8IYU8	MICU2_HUMAN	Calcium uptake protein 2, mitochondrial (EF-hand domain-containing family member A1)	MICU2 EFHA1	0.878706	1.94137	1.82636	2.04042	1.75075	1.89083	1.57521	1			MitoCarta3.0, GOCC		1		1
Q969Z0	FAKD4_HUMAN	FAST kinase domain-containing protein 4 (Cell cycle progression restoration protein 2, Cell cycle progression protein 2) (Protein TBRG4) (Transforming growth factor beta regulator 4)	TBRG4 CPR2 FASTKD4 KIAA0948	0.732177	1.62	1.43753	1.74032	1.45406	1.39484	1.04842	1			MitoCarta3.0, GOCC	1
Q5JRX3	PREP_HUMAN	Presequence protease, mitochondrial, hPreP, EC 3.4.24.- (Pitrilysin metalloproteinase 1, Metalloprotease 1, hMP1)	PITRM1 KIAA1104 MP1 PREP	0.960924	1.31491	1.70183	0.383047	0.372344	0.333755	-2.49891	1			MitoCarta3.0, GOCC	1
Q92552	RT27_HUMAN	28S ribosomal protein S27, mitochondrial, MRP-S27, S27mt (Mitochondrial ribosomal protein S27) (Mitochondrial small ribosomal subunit protein mS27)	MRPS27 KIAA0264	0.715416	1.29317	1.0096	1.08879	0.929341	1.20868	0.179754	1			MitoCarta3.0, GOCC	1	1
Q9Y2Z4	SYYM_HUMAN	Tyrosine--tRNA ligase, mitochondrial, EC 6.1.1.1 (Tyrosyl-tRNA synthetase, TyrRS)	YARS2 CGI-04	0.286241	1.24851	1.2974	1.17933	1.33518	1.37488	0.640357	1			MitoCarta3.0, GOCC	1
Q16795	NDUA9_HUMAN	NADH dehydrogenase [ubiquinone] 1 alpha subcomplex subunit 9, mitochondrial (Complex I-39kD, CI-39kD) (NADH-ubiquinone oxidoreductase 39 kDa subunit)	NDUFA9 NDUFS2L		1.1664	2.24858		1.6279	1.58752	1.17102	1			MitoCarta3.0, GOCC	1	1
Q16698	DECR_HUMAN	2,4-dienoyl-CoA reductase [(3E)-enoyl-CoA-producing], mitochondrial, EC 1.3.1.124 (2,4-dienoyl-CoA reductase [NADPH], 4-enoyl-CoA reductase [NADPH]) (Short chain dehydrogenase/reductase family 18C member 1)	DECR1 DECR SDR18C1		1.16298	1.24367	4.04261	3.87297	4.50649	3.50428	1			MitoCarta3.0, GOCC	1
P00387	NB5R3_HUMAN	NADH-cytochrome b5 reductase 3, B5R, Cytochrome b5 reductase, EC 1.6.2.2 (Diaphorase-1) [Cleaved into: NADH-cytochrome b5 reductase 3 membrane-bound form; NADH-cytochrome b5 reductase 3 soluble form ]	CYB5R3 DIA1	0.818027	1.15325	1.00217	1.77804	1.75843	1.5952	1.32396	1			MitoCarta3.0, GOCC			1
Q92947	GCDH_HUMAN	Glutaryl-CoA dehydrogenase, mitochondrial, GCD, EC 1.3.8.6	GCDH		1.12429	1.51012		1.42224	1.45426	0.896321	1			MitoCarta3.0, GOCC	1
Q9H9J2	RM44_HUMAN	39S ribosomal protein L44, mitochondrial, L44mt, MRP-L44, EC 3.1.26.- (Mitochondrial large ribosomal subunit protein mL44)	MRPL44		1.07429	1.82132		1.05011	1.11749	0.198464	1			MitoCarta3.0, GOCC	1	1
P05091	ALDH2_HUMAN	Aldehyde dehydrogenase, mitochondrial, EC 1.2.1.3 (ALDH class 2) (ALDH-E2) (ALDHI)	ALDH2 ALDM	0.955231	1.06061	1.14436	0.737282	0.745439	0.647742	-0.84415	1			MitoCarta3.0, GOCC	1
P82933	RT09_HUMAN	28S ribosomal protein S9, mitochondrial, MRP-S9, S9mt (Mitochondrial small ribosomal subunit protein uS9m)	MRPS9 RPMS9	0.978105	1.0533	1.11714	0.448577	0.445428	0.487548	-1.91238	1			MitoCarta3.0, GOCC	1	1
O14786	NRP1_HUMAN	Neuropilin-1 (Vascular endothelial cell growth factor 165 receptor) (CD antigen CD304)	NRP1 NRP VEGF165R		1.01712	1.18845		0.255573	0.254377	-3.37042	1			GOCC				1
Q9NV70	EXOC1_HUMAN	Exocyst complex component 1 (Exocyst complex component Sec3)	EXOC1 SEC3 SEC3L1 BM-012	1.96987	2.24882	1.30228	9.42199		8.49515	5.40764		1
Q96D15	RCN3_HUMAN	Reticulocalbin-3 (EF-hand calcium-binding protein RLP49)	RCN3 UNQ239/PRO272	1.73765	1.86433	1.96075	3.55534	4.36649	3.31463	3.25688		1
Q9BRK5	CAB45_HUMAN	45 kDa calcium-binding protein, Cab45 (Stromal cell-derived factor 4, SDF-4)	SDF4 CAB45 PSEC0034	1.72681	2.04167	1.43432	0.555916	0.547899	0.502067	-1.54129		1
P04439	HLAA_HUMAN	HLA class I histocompatibility antigen, A alpha chain (Human leukocyte antigen A, HLA-A)	HLA-A HLAA	1.63921	1.92667	1.45354	2.87005	2.82336	2.61331	2.51181		1
Q02818	NUCB1_HUMAN	Nucleobindin-1 (CALNUC)	NUCB1 NUC	1.4915	1.38601	1.29475	0.786751	0.844849	0.802093	-0.515957		1
P08648	ITA5_HUMAN	Integrin alpha-5 (CD49 antigen-like family member E) (Fibronectin receptor subunit alpha) (Integrin alpha-F) (VLA-5) (CD antigen CD49e) [Cleaved into: Integrin alpha-5 heavy chain; Integrin alpha-5 light chain ]	ITGA5 FNRA	1.46865	1.33529	1.65425	0.840974	0.866829	1.12214	-0.143919		1
Q96KG9	SCYL1_HUMAN	N-terminal kinase-like protein (Coated vesicle-associated kinase of 90 kDa) (SCY1-like protein 1) (Telomerase regulation-associated protein) (Telomerase transcriptional element-interacting factor) (Teratoma-associated tyrosine kinase)	SCYL1 CVAK90 GKLP NTKL TAPK TEIF TRAP HT019	1.42293	1.10984	1.35961	3.51427	2.70766	3.5313	2.90774		1
P68400	CSK21_HUMAN	Casein kinase II subunit alpha, CK II alpha, EC 2.7.11.1	CSNK2A1 CK2A1	1.38282	1.67269	1.93921	1.29463	1.31197	1.27423	0.634921		1
P49257	LMAN1_HUMAN	Protein ERGIC-53 (ER-Golgi intermediate compartment 53 kDa protein) (Gp58) (Intracellular mannose-specific lectin MR60) (Lectin mannose-binding 1)	LMAN1 ERGIC53 F5F8D	1.35081	1.17826	1.29112	3.1898	2.76497	2.14727	2.45028		1
Q9H074	PAIP1_HUMAN	Polyadenylate-binding protein-interacting protein 1, PABP-interacting protein 1, PAIP-1, Poly(A)-binding protein-interacting protein 1	PAIP1	1.33924	1.32958	1.21028	2.07092	1.97328	1.54023	1.53248		1
O14980	XPO1_HUMAN	Exportin-1, Exp1 (Chromosome region maintenance 1 protein homolog)	XPO1 CRM1	1.32523	1.07526	1.35999	3.63218	2.28586	2.6354	2.584		1
O43707	ACTN4_HUMAN	Alpha-actinin-4 (Non-muscle alpha-actinin 4)	ACTN4	1.26902	1.2452	1.25184	2.72435	2.60204	2.46827	2.35489		1
Q7L2H7	EIF3M_HUMAN	Eukaryotic translation initiation factor 3 subunit M, eIF3m (Fetal lung protein B5, hFL-B5) (PCI domain-containing protein 1)	EIF3M HFLB5 PCID1 GA17 PNAS-125	1.22988	1.28362	1.89429	2.68614	2.97949	2.84716	2.57224		1
Q9P2I0	CPSF2_HUMAN	Cleavage and polyadenylation specificity factor subunit 2 (Cleavage and polyadenylation specificity factor 100 kDa subunit, CPSF 100 kDa subunit)	CPSF2 CPSF100 KIAA1367	1.22842	1.67336	1.61537	1.6619	1.7073	1.79922	1.34155		1
P13010	XRCC5_HUMAN	X-ray repair cross-complementing protein 5, EC 3.6.4.- (86 kDa subunit of Ku antigen) (ATP-dependent DNA helicase 2 subunit 2) (ATP-dependent DNA helicase II 80 kDa subunit) (CTC box-binding factor 85 kDa subunit, CTC85, CTCBF) (DNA repair protein XRCC5) (Ku80) (Ku86) (Lupus Ku autoantigen protein p86) (Nuclear factor IV) (Thyroid-lupus autoantigen, TLAA) (X-ray repair complementing defective rep…	XRCC5 G22P2	1.22231	1.26571	1.36836	1.59706	1.67166	1.99927	1.38862		1
Q06323	PSME1_HUMAN	Proteasome activator complex subunit 1 (11S regulator complex subunit alpha, REG-alpha) (Activator of multicatalytic protease subunit 1) (Interferon gamma up-regulated I-5111 protein, IGUP I-5111) (Proteasome activator 28 subunit alpha, PA28a, PA28alpha)	PSME1 IFI5111	1.16389	1.08853	1.00825	1.63217	1.74011	1.88035	1.38142		1
P10321	HLAC_HUMAN	HLA class I histocompatibility antigen, C alpha chain, HLA-C (HLA-Cw) (Human leukocyte antigen C)	HLA-C HLAC	1.13706	1.54897	1.1097	2.07731	2.08723	1.93128	1.74858		1
P12814	ACTN1_HUMAN	Alpha-actinin-1 (Alpha-actinin cytoskeletal isoform) (F-actin cross-linking protein) (Non-muscle alpha-actinin-1)	ACTN1	1.12921	1.13275	1.09227	3.11551	3.37384	2.84535	2.79957		1
P26006	ITA3_HUMAN	Integrin alpha-3 (CD49 antigen-like family member C) (FRP-2) (Galactoprotein B3, GAPB3) (VLA-3 subunit alpha) (CD antigen CD49c) [Cleaved into: Integrin alpha-3 heavy chain; Integrin alpha-3 light chain ]	ITGA3 MSK18	1.11646	1.09926	1.1044	1.4968	2.64376	2.76472	2.05609		1
Q9BT78	CSN4_HUMAN	COP9 signalosome complex subunit 4, SGN4, Signalosome subunit 4 (JAB1-containing signalosome subunit 4)	COPS4 CSN4	1.08224	1.3234	1.1181	2.00387	2.19455	2.04914	1.80923		1
Q9Y2X3	NOP58_HUMAN	Nucleolar protein 58 (Nucleolar protein 5)	NOP58 NOL5 NOP5 HSPC120	1.05282	1.03606	1.03057	1.12318	1.12962	1.20956	0.353513		1
Q9Y6Y8	S23IP_HUMAN	SEC23-interacting protein (p125)	SEC23IP MSTP053	1.67716	1.4146	0.635854	1.66513	1.22673	1.01461	0.651153		1
Q6ZRP7	QSOX2_HUMAN	Sulfhydryl oxidase 2, EC 1.8.3.2 (Neuroblastoma-derived sulfhydryl oxidase) (Quiescin Q6-like protein 1)	QSOX2 QSCN6L1 SOXN	1.37421	1.14956	0.574328	1.47625	1.51191	1.26884	0.863086		1
Q6DD88	ATLA3_HUMAN	Atlastin-3, EC 3.6.5.-	ATL3	1.36972	1.06279	0.928578	3.73493	2.7953	2.40992	2.69306		1
P32004	L1CAM_HUMAN	Neural cell adhesion molecule L1, N-CAM-L1, NCAM-L1 (CD antigen CD171)	L1CAM CAML1 MIC5	1.36068	1.13342	0.757189	3.7865	2.25274	2.38416	2.54622		1
P00533	EGFR_HUMAN	Epidermal growth factor receptor, EC 2.7.10.1 (Proto-oncogene c-ErbB-1) (Receptor tyrosine-protein kinase erbB-1)	EGFR ERBB ERBB1 HER1	1.26083	1.1435	0.960381	3.77284	3.26628	3.14127	3.01346		1
Q92974	ARHG2_HUMAN	Rho guanine nucleotide exchange factor 2 (Guanine nucleotide exchange factor H1, GEF-H1) (Microtubule-regulated Rho-GEF) (Proliferating cell nucleolar antigen p40)	ARHGEF2 KIAA0651 LFP40	1.1529	1.09637	0.964263	2.95878	3.10942	2.65375	2.63211		1
Q8TC07	TBC15_HUMAN	TBC1 domain family member 15 (GTPase-activating protein RAB7, GAP for RAB7, Rab7-GAP)	TBC1D15	1.08677	1.47695		2.3379	3.26335		2.53991		1
P29317	EPHA2_HUMAN	Ephrin type-A receptor 2, EC 2.7.10.1 (Epithelial cell kinase) (Tyrosine-protein kinase receptor ECK)	EPHA2 ECK	1.08304	1.9928	0.156432	2.95098	1.69669	2.28266	2.06502		1
O94874	UFL1_HUMAN	E3 UFM1-protein ligase 1, EC 2.3.2.- (E3 UFM1-protein transferase 1) (Multiple alpha-helix protein located at ER) (Novel LZAP-binding protein) (Regulator of C53/LZAP and DDRGK1)	UFL1 KIAA0776 MAXER NLBP RCAD	1.06854	1.11078	0.588734	1.49287	1.2758	1.5111	0.876249		1
Q53GS9	SNUT2_HUMAN	U4/U6.U5 tri-snRNP-associated protein 2 (Inactive ubiquitin-specific peptidase 39) (SAD1 homolog) (U4/U6.U5 tri-snRNP-associated 65 kDa protein, 65K)	USP39 CGI-21 HSPC332 PRO2855	1.05854	1.25299	0.501983	1.29865	1.17758	1.05015	0.398703		1
P57740	NU107_HUMAN	Nuclear pore complex protein Nup107 (107 kDa nucleoporin) (Nucleoporin Nup107)	NUP107	1.02323	1.1961	0.905563	1.95376	1.72766	1.77126	1.4736		1
O00629	IMA3_HUMAN	Importin subunit alpha-3 (Importin alpha Q1, Qip1) (Karyopherin subunit alpha-4)	KPNA4 QIP1	1.58876	0.840343	1.64822	2.83276	2.12097	2.30333	2.17864		1
Q13619	CUL4A_HUMAN	Cullin-4A, CUL-4A	CUL4A	1.29106	0.841766	1.2735	2.29203	2.0541	2.58695	2.066		1
O43852	CALU_HUMAN	Calumenin (Crocalbin) (IEF SSP 9302)	CALU	1.24523	0.801993	1.2502	0.69591	0.649388	0.631367	-1.02894		1
Q9Y282	ERGI3_HUMAN	Endoplasmic reticulum-Golgi intermediate compartment protein 3 (Serologically defined breast cancer antigen NY-BR-84)	ERGIC3 C20orf47 ERV46 SDBCAG84 CGI-54 PRO0989	1.16426		1.19261	3.08239		3.31784	2.86878		1
P48960	AGRE5_HUMAN	Adhesion G protein-coupled receptor E5 (Leukocyte antigen CD97) (CD antigen CD97) [Cleaved into: Adhesion G protein-coupled receptor E5 subunit alpha; Adhesion G protein-coupled receptor E5 subunit beta ]	ADGRE5 CD97	1.13601	0.895623	1.42315	2.61092	2.29705	2.35324	2.18005		1
Q02809	PLOD1_HUMAN	Procollagen-lysine,2-oxoglutarate 5-dioxygenase 1, EC 1.14.11.4 (Lysyl hydroxylase 1, LH1)	PLOD1 LLH PLOD	1.13476	0.907407	1.13577	3.66631	3.35729	3.36159	3.06258		1
Q6NXE6	ARMC6_HUMAN	Armadillo repeat-containing protein 6	ARMC6	1.13376	0.66423	1.21786	2.08426	1.64291	1.89605	1.54956		1
Q96A33	CCD47_HUMAN	PAT complex subunit CCDC47 (Calumin) (Coiled-coil domain-containing protein 47)	CCDC47 GK001 MSTP041 PSEC0077	1.11144	0.91738	1.15086	0.990664	0.798519	0.778308	-0.383962		1
Q15293	RCN1_HUMAN	Reticulocalbin-1	RCN1 RCN	1.06701	0.930441	1.23162	0.550146	0.613088	0.560538	-1.36657		1
Q969X5	ERGI1_HUMAN	Endoplasmic reticulum-Golgi intermediate compartment protein 1 (ER-Golgi intermediate compartment 32 kDa protein, ERGIC-32)	ERGIC1 ERGIC32 KIAA1181 HT034	1.03751	0.447894	1.30527	2.27075	2.01109	2.59173	2.04475		1
P13797	PLST_HUMAN	Plastin-3 (T-plastin)	PLS3	1.01246	0.909038	1.00919	1.08735	1.03228	1.06551	0.147693		1
Q9Y6K5	OAS3_HUMAN	2'-5'-oligoadenylate synthase 3, (2-5')oligo(A) synthase 3, 2-5A synthase 3, EC 2.7.7.84 (p100 OAS, p100OAS)	OAS3 P/OKcl.4	0.434179	1.87976	1.15474	2.4124	1.31949	1.78549	1.5027		1
P05783	K1C18_HUMAN	Keratin, type I cytoskeletal 18 (Cell proliferation-inducing gene 46 protein) (Cytokeratin-18, CK-18) (Keratin-18, K18)	KRT18 CYK18 PIG46	0.846129	1.35161	1.42662	5.11761	4.74192	6.31807	4.15576		1
P30566	PUR8_HUMAN	Adenylosuccinate lyase, ADSL, ASL, EC 4.3.2.2 (Adenylosuccinase, ASase)	ADSL AMPS	0.907231	1.30398	1.15865	1.22494	1.16404	1.15547	0.411309		1
Q9P2B2	FPRP_HUMAN	Prostaglandin F2 receptor negative regulator (CD9 partner 1, CD9P-1) (Glu-Trp-Ile EWI motif-containing protein F, EWI-F) (Prostaglandin F2-alpha receptor regulatory protein) (Prostaglandin F2-alpha receptor-associated protein) (CD antigen CD315)	PTGFRN CD9P1 EWIF FPRP KIAA1436		1.2534	1.12655		0.931204	0.752366	-0.424772		1
Q8TAT6	NPL4_HUMAN	Nuclear protein localization protein 4 homolog, Protein NPL4	NPLOC4 KIAA1499 NPL4	0.889816	1.23548	1.14286	1.98703	2.31622	2.47491	2.01027		1
O00461	GOLI4_HUMAN	Golgi integral membrane protein 4 (Golgi integral membrane protein, cis, GIMPc) (Golgi phosphoprotein 4) (Golgi-localized phosphoprotein of 130 kDa, Golgi phosphoprotein of 130 kDa)	GOLIM4 GIMPC GOLPH4 GPP130		1.21455	1.51288		1.05844	0.936513	-0.00622682		1
Q8WTV0	SCRB1_HUMAN	Scavenger receptor class B member 1, SRB1 (CD36 and LIMPII analogous 1, CLA-1) (CD36 antigen-like 1) (Collagen type I receptor, thrombospondin receptor-like 1) (SR-BI) (CD antigen CD36)	SCARB1 CD36L1 CLA1	0.876658	1.1987	1.07703	0.785546	0.614303	0.873371	-0.68419		1
Q8NBJ5	GT251_HUMAN	Procollagen galactosyltransferase 1, EC 2.4.1.50 (Collagen beta(1-O)galactosyltransferase 1, ColGalT 1) (Glycosyltransferase 25 family member 1) (Hydroxylysine galactosyltransferase 1)	COLGALT1 GLT25D1 PSEC0241	0.8654	1.0416	1.13836	2.33953	2.33989	2.29202	2.07961		1
O95302	FKBP9_HUMAN	Peptidyl-prolyl cis-trans isomerase FKBP9, PPIase FKBP9, EC 5.2.1.8 (63 kDa FK506-binding protein, 63 kDa FKBP, FKBP-63) (FK506-binding protein 9, FKBP-9) (Rotamase)	FKBP9 FKBP60 FKBP63		1.01751	1.62354		1.4896	1.77514	1.20857		1

## Sheet: LPS-stimulated HMC3 cells
Revealing of mitochondrial proteome dynamics in LPS-stimulated HMC3 cells
Uniprot Accession	Entry Name	Protein names	Gene Names	Rep1-Log2ratio(+hv/-hv)	Rep2-Log2ratio(+hv/-hv)	Rep3-Log2ratio(+hv/-hv)	Rep1-ratio(LPS-48h/24h)	Rep2-ratio(LPS-48h/24h)	Rep3-ratio(LPS-48h/24h)	Log1.5-Average-ratio(LPS-48h/24h)	Localization			Evidence for mito
											Mitochondria	Others	Un-assigned
P42704	LPPRC_HUMAN	Leucine-rich PPR motif-containing protein, mitochondrial (130 kDa leucine-rich protein, LRP 130) (GP130)	LRPPRC LRP130	1.61347	1.58555	1.32608	1.22012	1.87397	1.41941	1.00739	1			GOCC, MitoCarta 3.0
Q7L2E3	DHX30_HUMAN	ATP-dependent RNA helicase DHX30, EC 3.6.4.13 (DEAH box protein 30)	DHX30 DDX30 KIAA0890	1.24558	1.34883	1.13022	1.09349	1.72237	1.2879	0.77267	1			GOCC, MitoCarta 3.0
P43304	GPDM_HUMAN	Glycerol-3-phosphate dehydrogenase, mitochondrial, GPD-M, GPDH-M, EC 1.1.5.3 (mitohondrial glycerophosphate dehydrogenase gene, mGDH) (mtGPD)	GPD2	1.02667	1.04102	1.23355	1.11942	1.35927	1.19006	0.49632	1			GOCC, MitoCarta 3.0
O60313	OPA1_HUMAN	Dynamin-like 120 kDa protein, mitochondrial, EC 3.6.5.5 (Optic atrophy protein 1) [Cleaved into: Dynamin-like 120 kDa protein, form S1 ]	OPA1 KIAA0567	1.53169	1.25275	1.10872	1.17417	1.38095	1.25544	0.589853	1			GOCC, MitoCarta 3.0
P38646	GRP75_HUMAN	Stress-70 protein, mitochondrial (75 kDa glucose-regulated protein, GRP-75) (Heat shock 70 kDa protein 9) (Mortalin, MOT) (Peptide-binding protein 74, PBP74)	HSPA9 GRP75 HSPA9B mt-HSP70	1.12838	1.12401	1.02506	1.2489	1.28077	1.32867	0.620581	1			GOCC, MitoCarta 3.0
P54886	P5CS_HUMAN	Delta-1-pyrroline-5-carboxylate synthase, P5CS (Aldehyde dehydrogenase family 18 member A1) [Includes: Glutamate 5-kinase, GK, EC 2.7.2.11 (Gamma-glutamyl kinase); Gamma-glutamyl phosphate reductase, GPR, EC 1.2.1.41 (Glutamate-5-semialdehyde dehydrogenase) (Glutamyl-gamma-semialdehyde dehydrogenase) ]	ALDH18A1 GSAS P5CS PYCS	1.60039	1.48978	1.31736	1.21136	1.86334	1.26452	0.910271	1			GOCC, MitoCarta 3.0
P49748	ACADV_HUMAN	Very long-chain specific acyl-CoA dehydrogenase, mitochondrial, VLCAD, EC 1.3.8.9	ACADVL VLCAD	2.08092	1.43314	1.80785	1.2957	1.22403	1.3805	0.647215	1			GOCC, MitoCarta 3.0
Q13423	NNTM_HUMAN	NAD(P) transhydrogenase, mitochondrial, EC 7.1.1.1 (Nicotinamide nucleotide transhydrogenase) (Pyridine nucleotide transhydrogenase)	NNT	1.41748	1.33875	1.43841	1.03909	1.11421	1.15448	0.240874	1			GOCC, MitoCarta 3.0
P06576	ATPB_HUMAN	ATP synthase subunit beta, mitochondrial, EC 7.1.2.2 (ATP synthase F1 subunit beta)	ATP5F1B ATP5B ATPMB ATPSB	1.61091	1.95559	1.06856	1.13391	1.16322	1.13481	0.33175	1			GOCC, MitoCarta 3.0
Q6UB35	C1TM_HUMAN	Monofunctional C1-tetrahydrofolate synthase, mitochondrial, EC 6.3.4.3 (Formyltetrahydrofolate synthetase)	MTHFD1L FTHFSDC1	1.56616	1.26501	1.4932	1.20504	1.70435	1.31194	0.842336	1			GOCC, MitoCarta 3.0
Q9HCC0	MCCB_HUMAN	Methylcrotonoyl-CoA carboxylase beta chain, mitochondrial, MCCase subunit beta, EC 6.4.1.4 (3-methylcrotonyl-CoA carboxylase 2) (3-methylcrotonyl-CoA carboxylase non-biotin-containing subunit) (3-methylcrotonyl-CoA:carbon dioxide ligase subunit beta)	MCCC2 MCCB	1.22542	1.45261	1.34989	1.13667	1.25165	1.22314	0.457501	1			GOCC, MitoCarta 3.0
P40926	MDHM_HUMAN	Malate dehydrogenase, mitochondrial, EC 1.1.1.37	MDH2	1.065	1.436	1.35651	1.28906	1.20128	1.10301	0.445099	1			GOCC, MitoCarta 3.0
O75390	CISY_HUMAN	Citrate synthase, mitochondrial, EC 2.3.3.1 (Citrate (Si)-synthase)	CS	1.69128	1.48751	1.49175	1.2403	1.17744	1.22212	0.476814	1			GOCC, MitoCarta 3.0
Q16822	PCKGM_HUMAN	Phosphoenolpyruvate carboxykinase [GTP], mitochondrial, PEPCK-M, EC 4.1.1.32	PCK2 PEPCK2	1.58064	1.81197	1.8091	2.19653	2.50322	2.24965	2.0718	1			GOCC, MitoCarta 3.0
P22033	MUTA_HUMAN	Methylmalonyl-CoA mutase, mitochondrial, MCM, EC 5.4.99.2 (Methylmalonyl-CoA isomerase)	MMUT MUT	1.26904	1.28968	1.28247	1.09552	1.34473	1.26977	0.523905	1			GOCC, MitoCarta 3.0
P22695	QCR2_HUMAN	Cytochrome b-c1 complex subunit 2, mitochondrial (Complex III subunit 2) (Core protein II) (Ubiquinol-cytochrome-c reductase complex core protein 2)	UQCRC2	1.62252	2.03399	1.16522	1.09081	1.03995	1.0817	0.168759	1			GOCC, MitoCarta 3.0
Q6PI48	SYDM_HUMAN	Aspartate--tRNA ligase, mitochondrial, EC 6.1.1.12 (Aspartyl-tRNA synthetase, AspRS)	DARS2	1.6648	1.22664	1.12726	1.22808	1.45549	1.2664	0.678471	1			GOCC, MitoCarta 3.0
O75439	MPPB_HUMAN	Mitochondrial-processing peptidase subunit beta, EC 3.4.24.64 (Beta-MPP) (P-52)	PMPCB MPPB	1.2187	1.03577	1.54595	1.33145	1.37493	1.41039	0.780475	1			GOCC, MitoCarta 3.0
Q8NCN5	PDPR_HUMAN	Pyruvate dehydrogenase phosphatase regulatory subunit, mitochondrial, PDPr	PDPR KIAA1990	1.90417	2.0602	1.09616	1.26557	1.44896	1.27799	0.704895	1			GOCC, MitoCarta 3.0
Q9BW92	SYTM_HUMAN	Threonine--tRNA ligase, mitochondrial, EC 6.1.1.3 (Threonyl-tRNA synthetase, ThrRS) (Threonyl-tRNA synthetase-like 1)	TARS2 TARSL1	1.5408	1.10215	1.33763	1.23494	1.58771	1.44083	0.866838	1			GOCC, MitoCarta 3.0
P05141	ADT2_HUMAN	ADP/ATP translocase 2 (ADP,ATP carrier protein 2) (ADP,ATP carrier protein, fibroblast isoform) (Adenine nucleotide translocator 2, ANT 2) (Solute carrier family 25 member 5) [Cleaved into: ADP/ATP translocase 2, N-terminally processed ]	SLC25A5 AAC2 ANT2	1.59212	1.23121	1.59597	1.33031	0.991281	1.24975	0.429951	1			GOCC, MitoCarta 3.0
Q8TD30	ALAT2_HUMAN	Alanine aminotransferase 2, ALT2, EC 2.6.1.2 (Glutamate pyruvate transaminase 2, GPT 2) (Glutamic--alanine transaminase 2) (Glutamic--pyruvic transaminase 2)	GPT2 AAT2 ALT2	1.53902	1.19763	1.28381	2.27928	2.4987	2.05629	2.0306	1			GOCC, MitoCarta 3.0
O75746	CMC1_HUMAN	Calcium-binding mitochondrial carrier protein Aralar1 (Mitochondrial aspartate glutamate carrier 1) (Solute carrier family 25 member 12)	SLC25A12 ARALAR1	1.92277	1.26955	1.19531	1.17515	0.887236	1.09337	0.124832	1			GOCC, MitoCarta 3.0
P30038	AL4A1_HUMAN	Delta-1-pyrroline-5-carboxylate dehydrogenase, mitochondrial, P5C dehydrogenase, EC 1.2.1.88 (Aldehyde dehydrogenase family 4 member A1) (L-glutamate gamma-semialdehyde dehydrogenase)	ALDH4A1 ALDH4 P5CDH	1.75398	1.20853	2.0855	1.16622	1.31185	1.24135	0.530142	1			GOCC, MitoCarta 3.0
P50213	IDH3A_HUMAN	Isocitrate dehydrogenase [NAD] subunit alpha, mitochondrial, EC 1.1.1.41 (Isocitric dehydrogenase subunit alpha) (NAD(+)-specific ICDH subunit alpha)	IDH3A	1.96673	1.75574	1.32892	1.21944	1.39239	1.19832	0.589586	1			GOCC, MitoCarta 3.0
Q9Y6N5	SQOR_HUMAN	Sulfide:quinone oxidoreductase, mitochondrial, SQOR, EC 1.8.5.8 (Sulfide dehydrogenase-like) (Sulfide quinone oxidoreductase)	SQOR SQRDL CGI-44	1.42952	2.61254	1.964	1.23623	1.11959	1.3171	0.49912	1			GOCC, MitoCarta 3.0
Q9NYK5	RM39_HUMAN	39S ribosomal protein L39, mitochondrial, L39mt, MRP-L39 (39S ribosomal protein L5, mitochondrial, L5mt, MRP-L5) (Mitochondrial large ribosomal subunit protein mL39)	MRPL39 C21orf92 MRPL5 RPML5 MSTP003 PRED22	1.5502	1.43291	1.23744	1.21009	1.34267	1.29998	0.616999	1			GOCC, MitoCarta 3.0
P82933	RT09_HUMAN	28S ribosomal protein S9, mitochondrial, MRP-S9, S9mt (Mitochondrial small ribosomal subunit protein uS9m)	MRPS9 RPMS9	1.68013	1.91705	1.50998	1.07288	1.13937	1.27439	0.370755	1			GOCC, MitoCarta 3.0
Q9P2R7	SUCB1_HUMAN	Succinate--CoA ligase [ADP-forming] subunit beta, mitochondrial, EC 6.2.1.5 (ATP-specific succinyl-CoA synthetase subunit beta, A-SCS) (Succinyl-CoA synthetase beta-A chain, SCS-betaA)	SUCLA2	2.13004	1.38351	1.30045	1.18434	1.30492	1.19341	0.505652	1			GOCC, MitoCarta 3.0
O43615	TIM44_HUMAN	Mitochondrial import inner membrane translocase subunit TIM44	TIMM44 MIMT44 TIM44	1.68071	1.03799	1.26377	1.25123	1.28242	1.41998	0.680748	1			GOCC, MitoCarta 3.0
Q9H078	CLPB_HUMAN	Caseinolytic peptidase B protein homolog, EC 3.6.1.- (Suppressor of potassium transport defect 3)	CLPB HSP78 SKD3	1.57014	1.01032	1.5036	1.06868	1.00356	1.13415	0.164087	1			GOCC, MitoCarta 3.0
O43837	IDH3B_HUMAN	Isocitrate dehydrogenase [NAD] subunit beta, mitochondrial (Isocitric dehydrogenase subunit beta) (NAD(+)-specific ICDH subunit beta)	IDH3B	1.62691	1.3832	1.48372	1.30298	1.53101	1.3309	0.809137	1			GOCC, MitoCarta 3.0
Q7L0Y3	TM10C_HUMAN	tRNA methyltransferase 10 homolog C (HBV pre-S2 trans-regulated protein 2) (Mitochondrial ribonuclease P protein 1, Mitochondrial RNase P protein 1) (RNA (guanine-9-)-methyltransferase domain-containing protein 1) (Renal carcinoma antigen NY-REN-49) (mRNA methyladenosine-N(1)-methyltransferase, EC 2.1.1.-) (tRNA (adenine(9)-N(1))-methyltransferase, EC 2.1.1.218) (tRNA (guanine(9)-N(1))-methyltran…	TRMT10C MRPP1 RG9MTD1	1.16097	1.88919	1.91997	1.18496	1.33894	1.28206	0.586868	1			GOCC, MitoCarta 3.0
Q9BZE1	RM37_HUMAN	39S ribosomal protein L37, mitochondrial, L37mt, MRP-L37 (39S ribosomal protein L2, mitochondrial, L2mt, MRP-L2) (Mitochondrial large ribosomal subunit protein mL37)	MRPL37 MRPL2 RPML2 HSPC235	1.32904	2.05186	1.51026	0.959882	1.16691	0.944669	0.0580563	1			GOCC, MitoCarta 3.0
Q6NVY1	HIBCH_HUMAN	3-hydroxyisobutyryl-CoA hydrolase, mitochondrial, EC 3.1.2.4 (3-hydroxyisobutyryl-coenzyme A hydrolase, HIB-CoA hydrolase, HIBYL-CoA-H)	HIBCH	1.89632	1.22003	1.31309	1.18927	1.37806	1.22503	0.578048	1			GOCC, MitoCarta 3.0
O95831	AIFM1_HUMAN	Apoptosis-inducing factor 1, mitochondrial, EC 1.6.99.- (Programmed cell death protein 8)	AIFM1 AIF PDCD8	1.31432	1.27428	1.53562	1.02781	0.99142	1.11121	0.104967	1			GOCC, MitoCarta 3.0
Q9H5Q4	TFB2M_HUMAN	Dimethyladenosine transferase 2, mitochondrial, EC 2.1.1.- (Hepatitis C virus NS5A-transactivated protein 5, HCV NS5A-transactivated protein 5) (Mitochondrial 12S rRNA dimethylase 2) (Mitochondrial transcription factor B2, h-mtTFB, h-mtTFB2, hTFB2M, mtTFB2) (S-adenosylmethionine-6-N', N'-adenosyl(rRNA) dimethyltransferase 2)	TFB2M NS5ATP5	1.62536	1.43179	1.27793	1.27766	1.51161	1.35342	0.795954	1			GOCC, MitoCarta 3.0
Q9Y305	ACOT9_HUMAN	Acyl-coenzyme A thioesterase 9, mitochondrial, Acyl-CoA thioesterase 9, EC 3.1.2.- (Acyl-CoA thioester hydrolase 9)	ACOT9 CGI-16	1.62479	1.90794	1.68363	1.71603	1.60937	1.5811	1.2133	1			GOCC, MitoCarta 3.0
Q5JPH6	SYEM_HUMAN	Probable glutamate--tRNA ligase, mitochondrial, EC 6.1.1.17 (Glutamyl-tRNA synthetase, GluRS)	EARS2 KIAA1970	1.80929	1.22414	1.49749	1.19774	1.72253	1.34734	0.869225	1			GOCC, MitoCarta 3.0
Q9Y2S7	PDIP2_HUMAN	Polymerase delta-interacting protein 2 (38 kDa DNA polymerase delta interaction protein, p38)	POLDIP2 PDIP38 POLD4 HSPC017	1.53685	1.07639	1.64685	1.15595	1.42374	1.39906	0.696375	1			GOCC, MitoCarta 3.0
Q6NUK1	SCMC1_HUMAN	Calcium-binding mitochondrial carrier protein SCaMC-1 (Mitochondrial ATP-Mg/Pi carrier protein 1) (Mitochondrial Ca(2+)-dependent solute carrier protein 1) (Small calcium-binding mitochondrial carrier protein 1) (Solute carrier family 25 member 24)	SLC25A24 APC1 MCSC1 SCAMC1	2.03111	1.76085	1.28403	1.24224	1.46418	1.20643	0.655181	1			GOCC, MitoCarta 3.0
P30048	PRDX3_HUMAN	Thioredoxin-dependent peroxide reductase, mitochondrial, EC 1.11.1.24 (Antioxidant protein 1, AOP-1) (HBC189) (Peroxiredoxin III, Prx-III) (Peroxiredoxin-3) (Protein MER5 homolog) (Thioredoxin-dependent peroxiredoxin 3)	PRDX3 AOP1	1.41532	2.05997	1.21515	1.30292	1.35731	1.28538	0.675742	1			GOCC, MitoCarta 3.0
P50336	PPOX_HUMAN	Protoporphyrinogen oxidase, PPO, EC 1.3.3.4	PPOX	1.49335	1.4338	1.23548	1.20116	1.38063	1.31069	0.642313	1			GOCC, MitoCarta 3.0
Q9NUL7	DDX28_HUMAN	Probable ATP-dependent RNA helicase DDX28, EC 3.6.4.13 (Mitochondrial DEAD box protein 28)	DDX28 MDDX28	2.44595	2.03698	2.07253	1.2335	1.33442	1.29887	0.625977	1			GOCC, MitoCarta 3.0
A4D1E9	GTPBA_HUMAN	GTP-binding protein 10 (Protein obg homolog 2, ObgH2)	GTPBP10 OBGH2 UG0751c10	1.62949	1.3718	2.09672	1.10615	1.2796	1.24307	0.469326	1			GOCC, MitoCarta 3.0
O75489	NDUS3_HUMAN	NADH dehydrogenase [ubiquinone] iron-sulfur protein 3, mitochondrial, EC 7.1.1.2 (Complex I-30kD, CI-30kD) (NADH-ubiquinone oxidoreductase 30 kDa subunit)	NDUFS3	2.75394	1.96318	1.96456	1.23499	1.1325	1.39132	0.55613	1			GOCC, MitoCarta 3.0
O94925	GLSK_HUMAN	Glutaminase kidney isoform, mitochondrial, GLS, EC 3.5.1.2 (K-glutaminase) (L-glutamine amidohydrolase) [Cleaved into: Glutaminase kidney isoform, mitochondrial 68 kDa chain; Glutaminase kidney isoform, mitochondrial 65 kDa chain ]	GLS GLS1 KIAA0838	1.36551	1.10719	1.48771	1.19595	1.39146	1.12599	0.526155	1			GOCC, MitoCarta 3.0
P55809	SCOT1_HUMAN	Succinyl-CoA:3-ketoacid coenzyme A transferase 1, mitochondrial, SCOT, EC 2.8.3.5 (3-oxoacid CoA-transferase 1) (Somatic-type succinyl-CoA:3-oxoacid CoA-transferase, SCOT-s) (Succinyl-CoA:3-oxoacid CoA transferase)	OXCT1 OXCT SCOT	1.05815	1.74652	2.18373	1.01108	1.10762	1.08502	0.162039	1			GOCC, MitoCarta 3.0
P30084	ECHM_HUMAN	Enoyl-CoA hydratase, mitochondrial, mECH, mECH1, EC 4.2.1.17, EC 5.3.3.8 (Enoyl-CoA hydratase 1, ECHS1) (Short-chain enoyl-CoA hydratase, SCEH)	ECHS1	1.66931	1.41926	1.14828	1.05931	1.10437	1.07322	0.187453	1			GOCC, MitoCarta 3.0
Q16698	DECR_HUMAN	2,4-dienoyl-CoA reductase [(3E)-enoyl-CoA-producing], mitochondrial, EC 1.3.1.124 (2,4-dienoyl-CoA reductase [NADPH], 4-enoyl-CoA reductase [NADPH]) (Short chain dehydrogenase/reductase family 18C member 1)	DECR1 DECR SDR18C1	1.463	1.37613	1.11029	1.06258	1.07062	1.04345	0.141104	1			GOCC, MitoCarta 3.0
Q8WW59	SPRY4_HUMAN	SPRY domain-containing protein 4	SPRYD4	2.0489	1.73444	1.8279	0.984018	1.08934	1.1737	0.195172	1			MitoCarta 3.0
P24539	AT5F1_HUMAN	ATP synthase F(0) complex subunit B1, mitochondrial (ATP synthase peripheral stalk-membrane subunit b) (ATP synthase proton-transporting mitochondrial F(0) complex subunit B1) (ATP synthase subunit b, ATPase subunit b)	ATP5PB ATP5F1	1.38809	2.14152	1.15504	1.46599	0.950015	1.11623	0.402788	1			GOCC, MitoCarta 3.0
Q9BQP7	MGME1_HUMAN	Mitochondrial genome maintenance exonuclease 1, EC 3.1.-.-	MGME1 C20orf72 DDK1	1.93971	1.91599	1.1882	1.36049	1.46204	1.41621	0.852487	1			GOCC, MitoCarta 3.0
O75127	PTCD1_HUMAN	Pentatricopeptide repeat-containing protein 1, mitochondrial	PTCD1 KIAA0632	1.54958	1.09289	1.28566	1.10122	1.53884	1.30176	0.673372	1			GOCC, MitoCarta 3.0
Q02252	MMSA_HUMAN	Methylmalonate-semialdehyde dehydrogenase [acylating], mitochondrial, MMSDH, Malonate-semialdehyde dehydrogenase [acylating], EC 1.2.1.18, EC 1.2.1.27 (Aldehyde dehydrogenase family 6 member A1)	ALDH6A1 MMSDH	1.53176	1.18124	1.32554	1.25156	1.42098	1.40035	0.754047	1			GOCC, MitoCarta 3.0
O96008	TOM40_HUMAN	Mitochondrial import receptor subunit TOM40 homolog (Protein Haymaker) (Translocase of outer membrane 40 kDa subunit homolog) (p38.5)	TOMM40 C19orf1 PEREC1 TOM40	1.36715	1.07273	1.23099	1.09428	0.939328	0.933055	-0.0275569	1			GOCC, MitoCarta 3.0
Q86UY8	NT5D3_HUMAN	5'-nucleotidase domain-containing protein 3, EC 3.1.3.- (GRP94-neighboring nucleotidase)	NT5DC3 GNN TU12B1-TY	1.97552	2.07474	2.03401	1.17992	1.31071	1.33356	0.598654	1			MitoCarta 3.0
Q9H9J2	RM44_HUMAN	39S ribosomal protein L44, mitochondrial, L44mt, MRP-L44, EC 3.1.26.- (Mitochondrial large ribosomal subunit protein mL44)	MRPL44	1.82736	1.92382	1.49596	1.14892	1.20354	1.10868	0.352646	1			GOCC, MitoCarta 3.0
P82675	RT05_HUMAN	28S ribosomal protein S5, mitochondrial, MRP-S5, S5mt (Mitochondrial small ribosomal subunit protein uS5m)	MRPS5	1.96623	1.35939	1.64897	1.09825	1.15736	1.25999	0.391153	1			GOCC, MitoCarta 3.0
Q9NX63	MIC19_HUMAN	MICOS complex subunit MIC19 (Coiled-coil-helix-coiled-coil-helix domain-containing protein 3)	CHCHD3 MIC19 MINOS3	1.99322	2.1075	1.56616	0.500139	0.915415	0.695522	-0.866695	1			GOCC, MitoCarta 3.0
P13995	MTDC_HUMAN	Bifunctional methylenetetrahydrofolate dehydrogenase/cyclohydrolase, mitochondrial [Includes: NAD-dependent methylenetetrahydrofolate dehydrogenase, EC 1.5.1.15; Methenyltetrahydrofolate cyclohydrolase, EC 3.5.4.9 ]	MTHFD2 NMDMC	1.35216	1.12941	1.10964	1.41968	1.56592	1.51756	1.00173	1			GOCC, MitoCarta 3.0
Q9UKU7	ACAD8_HUMAN	Isobutyryl-CoA dehydrogenase, mitochondrial, IBDH, EC 1.3.8.- (Activator-recruited cofactor 42 kDa component, ARC42) (Acyl-CoA dehydrogenase family member 8, ACAD-8)	ACAD8 ARC42 IBD	1.46027	1.60148	1.39473	1.02606	1.44516	1.17499	0.48111	1			GOCC, MitoCarta 3.0
O95900	TRUB2_HUMAN	Pseudouridylate synthase TRUB2, mitochondrial, EC 5.4.99.- (TruB pseudouridine synthase homolog 2) (tRNA pseudouridine 55 synthase TRUB2, Psi55 synthase TRUB2, EC 5.4.99.25)	TRUB2	1.15215	1.86254	1.60183	1.13999	1.24153	1.24502	0.467773	1			GOCC, MitoCarta 3.0
Q07021	C1QBP_HUMAN	Complement component 1 Q subcomponent-binding protein, mitochondrial (ASF/SF2-associated protein p32) (Glycoprotein gC1qBP, C1qBP) (Hyaluronan-binding protein 1) (Mitochondrial matrix protein p32) (gC1q-R protein) (p33, SF2AP32)	C1QBP GC1QBP HABP1 SF2P32	1.30902	1.33559	1.21657	1.08964	1.12771	1.00003	0.172526	1			GOCC, MitoCarta 3.0
Q8TB22	SPT20_HUMAN	Spermatogenesis-associated protein 20 (Sperm-specific protein 411, Ssp411)	SPATA20	1.57051	1.44598	1.67454	0.996075	1.43247	1.26252	0.511271	1			MitoCarta 3.0
Q9BQ95	ECSIT_HUMAN	Evolutionarily conserved signaling intermediate in Toll pathway, mitochondrial (Protein SITPEC)	ECSIT	1.4714	1.47755	2.02192	1.23775	0.935046	1.05212	0.178302	1			GOCC, MitoCarta 3.0
P27144	KAD4_HUMAN	Adenylate kinase 4, mitochondrial, AK 4, EC 2.7.4.10, EC 2.7.4.6 (Adenylate kinase 3-like) (GTP:AMP phosphotransferase AK4)	AK4 AK3 AK3L1	2.69293	1.91655	1.18057	1.3212	1.19321	1.13391	0.482542	1			GOCC, MitoCarta 3.0
Q02978	M2OM_HUMAN	Mitochondrial 2-oxoglutarate/malate carrier protein, OGCP (Solute carrier family 25 member 11)	SLC25A11 SLC20A4	1.57	1.03068	1.44525	1.27375	0.884721	1.24076	0.308136	1			GOCC, MitoCarta 3.0
P42126	ECI1_HUMAN	Enoyl-CoA delta isomerase 1, mitochondrial, EC 5.3.3.8 (3,2-trans-enoyl-CoA isomerase) (Delta(3),Delta(2)-enoyl-CoA isomerase, D3,D2-enoyl-CoA isomerase) (Dodecenoyl-CoA isomerase)	ECI1 DCI	1.78912	1.6606	1.61449	1.31606	1.30294	1.34161	0.685104	1			GOCC, MitoCarta 3.0
O95299	NDUAA_HUMAN	NADH dehydrogenase [ubiquinone] 1 alpha subcomplex subunit 10, mitochondrial (Complex I-42kD, CI-42kD) (NADH-ubiquinone oxidoreductase 42 kDa subunit)	NDUFA10	2.69696	1.72025	1.21086	1.37398	1.13455	1.11172	0.463492	1			GOCC, MitoCarta 3.0
P49406	RM19_HUMAN	39S ribosomal protein L19, mitochondrial, L19mt, MRP-L19 (39S ribosomal protein L15, mitochondrial, L15mt, MRP-L15) (Mitochondrial large ribosomal subunit protein bL19m)	MRPL19 KIAA0104 MRPL15	1.86597	1.46147	1.46483	1.16039	1.18796	1.16151	0.387114	1			GOCC, MitoCarta 3.0
Q9BT17	MTG1_HUMAN	Mitochondrial ribosome-associated GTPase 1 (GTP-binding protein 7) (Mitochondrial GTPase 1)	MTG1 GTPBP7	1.71153	1.32236	1.41517	1.18377	1.17189	1.18662	0.409796	1			GOCC, MitoCarta 3.0
Q8WVM0	TFB1M_HUMAN	Dimethyladenosine transferase 1, mitochondrial, EC 2.1.1.- (Mitochondrial 12S rRNA dimethylase 1) (Mitochondrial transcription factor B1, h-mtTFB, h-mtTFB1, hTFB1M, mtTFB1) (S-adenosylmethionine-6-N', N'-adenosyl(rRNA) dimethyltransferase 1)	TFB1M CGI-75	1.73835	1.58732	1.6375	1.0931	1.22967	1.25496	0.43436	1			GOCC, MitoCarta 3.0
Q9NZJ7	MTCH1_HUMAN	Mitochondrial carrier homolog 1 (Presenilin-associated protein)	MTCH1 PSAP CGI-64 UNQ1871/PRO4314	2.02181	1.11891	1.36	1.04498	0.722438	0.960511	-0.234475	1			GOCC, MitoCarta 3.0
P48047	ATPO_HUMAN	ATP synthase subunit O, mitochondrial (ATP synthase peripheral stalk subunit OSCP) (Oligomycin sensitivity conferral protein, OSCP)	ATP5PO ATP5O ATPO	1.58744	1.39255	1.06783	0.939009	1.03432	1.04999	0.0190951	1			GOCC, MitoCarta 3.0
Q96C36	P5CR2_HUMAN	Pyrroline-5-carboxylate reductase 2, P5C reductase 2, P5CR 2, EC 1.5.1.2	PYCR2	1.32424	1.20406	1.26734	1.22858	1.53832	1.28146	0.739156	1			GOCC, MitoCarta 3.0
Q16134	ETFD_HUMAN	Electron transfer flavoprotein-ubiquinone oxidoreductase, mitochondrial, ETF-QO, ETF-ubiquinone oxidoreductase, EC 1.5.5.1 (Electron-transferring-flavoprotein dehydrogenase, ETF dehydrogenase)	ETFDH	1.49751	1.31292	1.09644	1.08511	1.09681	1.01052	0.153337	1			GOCC, MitoCarta 3.0
Q7L8L6	FAKD5_HUMAN	FAST kinase domain-containing protein 5, mitochondrial	FASTKD5 KIAA1792	2.30427	2.08326	1.18052	1.17299	1.90495	1.3169	0.94168	1			GOCC, MitoCarta 3.0, PubMed: 20869947
Q5T440	CAF17_HUMAN	Putative transferase CAF17, mitochondrial, EC 2.1.-.- (Iron-sulfur cluster assembly factor homolog)	IBA57 C1orf69	1.35441	2.02873	1.81335	1.08039	1.16325	1.12018	0.282302	1			GOCC, MitoCarta 3.0
O75648	MTU1_HUMAN	Mitochondrial tRNA-specific 2-thiouridylase 1, EC 2.8.1.14 (MTO2 homolog)	TRMU MTU1 TRMT1	2.29461	1.71066	1.1755	1.0912	1.33277	1.12771	0.416334	1			GOCC, MitoCarta 3.0
Q9NR28	DBLOH_HUMAN	Diablo IAP-binding mitochondrial protein (Diablo homolog, mitochondrial) (Direct IAP-binding protein with low pI) (Second mitochondria-derived activator of caspase, Smac)	DIABLO SMAC	1.39927	1.84838	1.02279	1.37677	1.115	1.16984	0.491517	1			GOCC, MitoCarta 3.0
Q86WA6	BPHL_HUMAN	Valacyclovir hydrolase, VACVase, Valacyclovirase, EC 3.1.-.- (Biphenyl hydrolase-like protein) (Biphenyl hydrolase-related protein, Bph-rp) (Breast epithelial mucin-associated antigen, MCNAA)	BPHL MCNAA	1.74031	1.22116	1.79498	1.21354	1.39665	1.48466	0.767312	1			GOCC, MitoCarta 3.0
P51553	IDH3G_HUMAN	Isocitrate dehydrogenase [NAD] subunit gamma, mitochondrial (Isocitric dehydrogenase subunit gamma) (NAD(+)-specific ICDH subunit gamma)	IDH3G	1.60838	1.44237	1.22995	1.74745	2.5134	1.37003	1.55292	1			GOCC, MitoCarta 3.0
O15091	MRPP3_HUMAN	Mitochondrial ribonuclease P catalytic subunit, EC 3.1.26.5 (Mitochondrial ribonuclease P protein 3, Mitochondrial RNase P protein 3) (Protein only RNase P catalytic subunit)	PRORP KIAA0391 MRPP3	1.71406	2.2661	2.02077	1.13249	1.94829	1.583	1.08817	1			GOCC, MitoCarta 3.0
Q8IVS2	FABD_HUMAN	Malonyl-CoA-acyl carrier protein transacylase, mitochondrial, MCT, EC 2.3.1.39 (Mitochondrial malonyl CoA:ACP acyltransferase) (Mitochondrial malonyltransferase) ([Acyl-carrier-protein] malonyltransferase)	MCAT MT	1.44606	1.68667	1.20872	1.04945	1.28565	1.21128	0.412649	1			GOCC, MitoCarta 3.0
P09001	RM03_HUMAN	39S ribosomal protein L3, mitochondrial, L3mt, MRP-L3 (Mitochondrial large ribosomal subunit protein uL3m)	MRPL3 MRL3 RPML3	2.14582	2.16266	1.13557	1.3256	1.47483	1.32356	0.784801	1			GOCC, MitoCarta 3.0
Q9BYD3	RM04_HUMAN	39S ribosomal protein L4, mitochondrial, L4mt, MRP-L4 (Mitochondrial large ribosomal subunit protein uL4m)	MRPL4 CDABP0091 CGI-28	1.93316	1.84763	2.63235	0.972765	0.939958	1.06074	-0.0219096	1			GOCC, MitoCarta 3.0
A8MXV4	NUD19_HUMAN	Acyl-coenzyme A diphosphatase NUDT19, EC 3.6.1.- (Nucleoside diphosphate-linked moiety X motif 19, Nudix motif 19)	NUDT19	1.21662	1.88265	1.73901	1.17926	1.16529	1.29339	0.475518	1			MitoCarta 3.0
Q96A35	RM24_HUMAN	39S ribosomal protein L24, mitochondrial, L24mt, MRP-L24 (Mitochondrial large ribosomal subunit protein uL24m)	MRPL24	1.20953	1.93089	1.79263	1.04292	1.117	1.14164	0.236223	1			GOCC, MitoCarta 3.0
Q96DB5	RMD1_HUMAN	Regulator of microtubule dynamics protein 1, RMD-1, hRMD-1 (Protein FAM82B)	RMDN1 FAM82B CGI-90	2.63353	1.34774	2.40505	1.29667	1.22367	1.36794	0.639647	1			MitoCarta 3.0
Q9Y2Q9	RT28_HUMAN	28S ribosomal protein S28, mitochondrial, MRP-S28, S28mt (28S ribosomal protein S35, mitochondrial, MRP-S35, S35mt) (Mitochondrial small ribosomal subunit protein bS1m)	MRPS28 MRPS35 HSPC007	1.51793	2.12909	1.12486	1.08803	1.33782	1.42805	0.617739	1			GOCC, MitoCarta 3.0
Q9HAV7	GRPE1_HUMAN	GrpE protein homolog 1, mitochondrial (HMGE) (Mt-GrpE#1)	GRPEL1 GREPEL1	1.51709	1.326	1.39254	1.16349	1.45152	1.20049	0.593049	1			GOCC, MitoCarta 3.0
Q9BSH4	TACO1_HUMAN	Translational activator of cytochrome c oxidase 1 (Coiled-coil domain-containing protein 44) (Translational activator of mitochondrially-encoded cytochrome c oxidase I)	TACO1 CCDC44 PRO0477	1.5035	1.47737	1.78352	1.17437	1.25231	1.31992	0.548105	1			GOCC, MitoCarta 3.0
Q9HC21	TPC_HUMAN	Mitochondrial thiamine pyrophosphate carrier (Mitochondrial uncoupling protein 1) (Solute carrier family 25 member 19)	SLC25A19 DNC MUP1	1.28079	2.16474	1.71486	1.34916	1.2004	1.46502	0.718487	1			GOCC, MitoCarta 3.0
Q9H2W6	RM46_HUMAN	39S ribosomal protein L46, mitochondrial, L46mt, MRP-L46 (Mitochondrial large ribosomal subunit protein mL46) (P2ECSL)	MRPL46 C15orf4 LIECG2	1.49578	1.21173	1.54586	1.21143	1.12815	1.0972	0.335228	1			GOCC, MitoCarta 3.0
Q4G0N4	NAKD2_HUMAN	NAD kinase 2, mitochondrial, EC 2.7.1.23 (Mitochondrial NAD kinase) (NAD kinase domain-containing protein 1, mitochondrial)	NADK2 C5orf33 MNADK NADKD1	1.9254	1.52452	1.49835	1.15456	1.06547	1.30129	0.395158	1			GOCC, MitoCarta 3.0
Q96RR1	PEO1_HUMAN	Twinkle mtDNA helicase, EC 3.6.4.12 (Progressive external ophthalmoplegia 1 protein) (T7 gp4-like protein with intramitochondrial nucleoid localization) (T7-like mitochondrial DNA helicase) (Twinkle protein, mitochondrial)	TWNK C10orf2 PEO1	1.3647	1.46559	1.81563	0.990797	1.66694	1.21681	0.630923	1			GOCC, MitoCarta 3.0
Q9BXW7	HDHD5_HUMAN	Haloacid dehalogenase-like hydrolase domain-containing 5 (Cat eye syndrome critical region protein 5)	HDHD5 CECR5	2.07862	1.30661	1.22219	1.16549	1.32238	1.29904	0.574496	1			GOCC, MitoCarta 3.0
Q3ZCQ8	TIM50_HUMAN	Mitochondrial import inner membrane translocase subunit TIM50	TIMM50 TIM50 PRO1512	1.18937	1.63781	1.46876	1.09692	1.11083	1.08972	0.233164	1			GOCC, MitoCarta 3.0
Q5TC12	ATPF1_HUMAN	ATP synthase mitochondrial F1 complex assembly factor 1 (ATP11 homolog)	ATPAF1 ATP11	1.69482	1.40436	1.45695	1.14346	1.01415	1.16026	0.248381	1			GOCC, MitoCarta 3.0
Q8N0Z8	PUSL1_HUMAN	tRNA pseudouridine synthase-like 1, EC 5.4.99.- (tRNA pseudouridylate synthase-like 1) (tRNA-uridine isomerase-like 1)	PUSL1	1.82624	1.76313	1.84655	1.09759	1.16082	1.25649	0.390658	1			GOCC, MitoCarta 3.0
Q7Z4W1	DCXR_HUMAN	L-xylulose reductase, XR, EC 1.1.1.10 (Carbonyl reductase II) (Dicarbonyl/L-xylulose reductase) (Kidney dicarbonyl reductase, kiDCR) (Short chain dehydrogenase/reductase family 20C member 1) (Sperm surface protein P34H)	DCXR SDR20C1	1.35055	1.92499	1.22566	1.11737	1.22145	1.04607	0.2977	1			MitoCarta 3.0
P56556	NDUA6_HUMAN	NADH dehydrogenase [ubiquinone] 1 alpha subcomplex subunit 6 (Complex I-B14, CI-B14) (LYR motif-containing protein 6) (NADH-ubiquinone oxidoreductase B14 subunit)	NDUFA6 LYRM6 NADHB14	1.88214	3.12057	2.45685	1.06396	1.04024	1.11609	0.174762	1			GOCC, MitoCarta 3.0
Q9HD33	RM47_HUMAN	39S ribosomal protein L47, mitochondrial, L47mt, MRP-L47 (Mitochondrial large ribosomal subunit protein uL29m) (Nasopharyngeal carcinoma metastasis-related protein 1)	MRPL47 NCM1 CGI-204	1.99402	2.00891	1.27631	0.962369	1.24255	1.15637	0.280449	1			GOCC, MitoCarta 3.0
Q9NP80	PLPL8_HUMAN	Calcium-independent phospholipase A2-gamma, EC 3.1.1.-, EC 3.1.1.5 (Intracellular membrane-associated calcium-independent phospholipase A2 gamma, iPLA2-gamma) (PNPLA-gamma) (Patatin-like phospholipase domain-containing protein 8) (iPLA2-2)	PNPLA8 IPLA22 IPLA2G BM-043	1.59808	1.29699	1.26991	1.09871	1.09851	1.12466	0.251359	1			GOCC, MitoCarta 3.0, PubMed: 17047165
Q9NZB8	MOCS1_HUMAN	Molybdenum cofactor biosynthesis protein 1 (Cell migration-inducing gene 11 protein) (Molybdenum cofactor synthesis-step 1 protein A-B) [Includes: GTP 3',8-cyclase, EC 4.1.99.22 (Molybdenum cofactor biosynthesis protein A); Cyclic pyranopterin monophosphate synthase, EC 4.6.1.17 (Molybdenum cofactor biosynthesis protein C) ]	MOCS1 MIG11	1.96414	1.27777	1.51911	1.0965	1.39164	1.27411	0.558383	1			MitoCarta 3.0
Q8NFV4	ABHDB_HUMAN	Protein ABHD11, EC 3.-.-.- (Alpha/beta hydrolase domain-containing protein 11, Abhydrolase domain-containing protein 11) (Williams-Beuren syndrome chromosomal region 21 protein)	ABHD11 WBSCR21 PP1226	2.24009	1.39009	1.25891	1.13562	1.09477	1.25888	0.37261	1			GOCC, MitoCarta 3.0
Q9H061	T126A_HUMAN	Transmembrane protein 126A	TMEM126A	1.27115	1.22337	1.71689	1.08213	1.01791	0.977938	0.0632861	1			GOCC, MitoCarta 3.0
Q9Y3E5	PTH2_HUMAN	Peptidyl-tRNA hydrolase 2, mitochondrial, PTH 2, EC 3.1.1.29 (Bcl-2 inhibitor of transcription 1)	PTRH2 BIT1 PTH2 CGI-147	1.52587	1.65175	1.38309	0.972421	1.02474	0.925858	-0.0641134	1			GOCC, MitoCarta 3.0
Q9NQH7	XPP3_HUMAN	Xaa-Pro aminopeptidase 3, X-Pro aminopeptidase 3, EC 3.4.11.9 (Aminopeptidase P3, APP3)	XPNPEP3	1.19702	1.02402	1.20001	0.823765	1.03081	1.09474	-0.042018	1			GOCC, MitoCarta 3.0
Q8IWA4	MFN1_HUMAN	Mitofusin-1, EC 3.6.5.- (Fzo homolog) (Transmembrane GTPase MFN1)	MFN1	1.50554	1.29686	1.25075	0.815439	0.972615	0.972316	-0.205314	1			GOCC, MitoCarta 3.0
P13073	COX41_HUMAN	Cytochrome c oxidase subunit 4 isoform 1, mitochondrial (Cytochrome c oxidase polypeptide IV) (Cytochrome c oxidase subunit IV isoform 1, COX IV-1)	COX4I1 COX4	2.38533	1.41245	1.23513	1.22945	1.00522	1.13883	0.289393	1			GOCC, MitoCarta 3.0
O75208	COQ9_HUMAN	Ubiquinone biosynthesis protein COQ9, mitochondrial	COQ9 C16orf49 HSPC326 PSEC0129	1.47073	1.65422	2.19456	1.374	1.46455	1.19102	0.727675	1			GOCC, MitoCarta 3.0
Q14197	ICT1_HUMAN	Peptidyl-tRNA hydrolase ICT1, mitochondrial, EC 3.1.1.29 (39S ribosomal protein L58, mitochondrial, MRP-L58) (Digestion substraction 1, DS-1) (Immature colon carcinoma transcript 1 protein) (Mitochondrial large ribosomal subunit protein mL62)	MRPL58 DS1 ICT1	1.13305	1.77753	1.70594	1.2068	1.23797	1.3942	0.60817	1			GOCC, MitoCarta 3.0
Q16740	CLPP_HUMAN	ATP-dependent Clp protease proteolytic subunit, mitochondrial, EC 3.4.21.92 (Endopeptidase Clp)	CLPP	1.30177	1.25713	1.77342	1.08204	1.16773	1.1721	0.324504	1			GOCC, MitoCarta 3.0
O96000	NDUBA_HUMAN	NADH dehydrogenase [ubiquinone] 1 beta subcomplex subunit 10 (Complex I-PDSW, CI-PDSW) (NADH-ubiquinone oxidoreductase PDSW subunit)	NDUFB10	2.48233	2.62656	1.80319	1.08247	1.1211	1	0.161919	1			GOCC, MitoCarta 3.0
Q96BW9	TAM41_HUMAN	Phosphatidate cytidylyltransferase, mitochondrial, EC 2.7.7.41 (CDP-diacylglycerol synthase, CDP-DAG synthase) (Mitochondrial translocator assembly and maintenance protein 41 homolog, TAM41)	TAMM41 C3orf31	2.79569	1.68792	2.61405	1.25467	1.21623	1.24478	0.527664	1			GOCC, MitoCarta 3.0
P51649	SSDH_HUMAN	Succinate-semialdehyde dehydrogenase, mitochondrial, EC 1.2.1.24 (Aldehyde dehydrogenase family 5 member A1) (NAD(+)-dependent succinic semialdehyde dehydrogenase)	ALDH5A1 SSADH	1.64341	1.4002	1.12253	1.27903	1.42044	1.06646	0.560802	1			GOCC, MitoCarta 3.0
Q9H9P8	L2HDH_HUMAN	L-2-hydroxyglutarate dehydrogenase, mitochondrial, EC 1.1.99.2 (Duranin)	L2HGDH C14orf160	1.3285	1.19892	1.42196	1.19673	1.58113	1.37487	0.80193	1			GOCC, MitoCarta 3.0
Q9H936	GHC1_HUMAN	Mitochondrial glutamate carrier 1, GC-1 (Glutamate/H(+) symporter 1) (Solute carrier family 25 member 22)	SLC25A22 GC1	1.0491	1.09603	1.69705	0.974646	1.03438	1.02857	0.0307193	1			GOCC, MitoCarta 3.0
O75306	NDUS2_HUMAN	NADH dehydrogenase [ubiquinone] iron-sulfur protein 2, mitochondrial, EC 7.1.1.2 (Complex I-49kD, CI-49kD) (NADH-ubiquinone oxidoreductase 49 kDa subunit)	NDUFS2	1.94095	1.57347	1.39227	1.30616	1.11841	1.32126	0.547594	1			GOCC, MitoCarta 3.0
Q15526	SURF1_HUMAN	Surfeit locus protein 1	SURF1 SURF-1	1.9256	2.39254	1.42562	1.00671	1.1074	1.18229	0.23237	1			GOCC, MitoCarta 3.0
P51687	SUOX_HUMAN	Sulfite oxidase, mitochondrial, EC 1.8.3.1	SUOX	1.34436	1.68877	2.02334	1.18157	0.899884	1.04926	0.105182	1			GOCC, MitoCarta 3.0
Q9BYC9	RM20_HUMAN	39S ribosomal protein L20, mitochondrial, L20mt, MRP-L20 (Mitochondrial large ribosomal subunit protein bL20m)	MRPL20	1.46957	1.349	1.3081	1.04564	1.22914	1.17409	0.34388	1			GOCC, MitoCarta 3.0
Q9P0J0	NDUAD_HUMAN	NADH dehydrogenase [ubiquinone] 1 alpha subcomplex subunit 13 (Cell death regulatory protein GRIM-19) (Complex I-B16.6, CI-B16.6) (Gene associated with retinoic and interferon-induced mortality 19 protein, GRIM-19, Gene associated with retinoic and IFN-induced mortality 19 protein) (NADH-ubiquinone oxidoreductase B16.6 subunit)	NDUFA13 GRIM19 CDA016 CGI-39	2.25411	1.99635	1.79435	0.970327	0.937921	0.94618	-0.122677	1			GOCC, MitoCarta 3.0
Q86UT6	NLRX1_HUMAN	NLR family member X1 (Caterpiller protein 11.3, CLR11.3) (Nucleotide-binding oligomerization domain protein 26) (Nucleotide-binding oligomerization domain protein 5) (Nucleotide-binding oligomerization domain protein 9)	NLRX1 NOD26 NOD5 NOD9	1.99207	1.14049	1.5418	1.08598	1.18046	1.18468	0.345496	1			GOCC, MitoCarta 3.0
Q8NE22	SETD9_HUMAN	SET domain-containing protein 9, EC 2.1.1.-	SETD9 C5orf35	1.17403	1.04955	2.24401	0.855634	0.936316	1.02232	-0.157623	1			MitoCarta 3.0
O95363	SYFM_HUMAN	Phenylalanine--tRNA ligase, mitochondrial, EC 6.1.1.20 (Phenylalanyl-tRNA synthetase, PheRS)	FARS2 FARS1 HSPC320	1.68376	2.09736	1.10128	1.06796	1.35463	1.31747	0.543793	1			GOCC, MitoCarta 3.0
O95571	ETHE1_HUMAN	Persulfide dioxygenase ETHE1, mitochondrial, EC 1.13.11.18 (Ethylmalonic encephalopathy protein 1) (Hepatoma subtracted clone one protein) (Sulfur dioxygenase ETHE1)	ETHE1 HSCO	1.36181	1.51174	1.41471	1.12579	1.11234	1.11214	0.272347	1			GOCC, MitoCarta 3.0
Q13505	MTX1_HUMAN	Metaxin-1 (Mitochondrial outer membrane import complex protein 1)	MTX1 MTX MTXN	1.54086	3.19441	2.05695	1.05376	1.66641	1.08837	0.588549	1			MitoCarta 3.0
Q9NWS8	RMND1_HUMAN	Required for meiotic nuclear division protein 1 homolog	RMND1 C6orf96	1.08219	1.81602	1.97951	0.932	0.835173	1.05076	-0.154407	1			GOCC, MitoCarta 3.0
O75414	NDK6_HUMAN	Nucleoside diphosphate kinase 6, NDK 6, NDP kinase 6, EC 2.7.4.6 (Inhibitor of p53-induced apoptosis-alpha, IPIA-alpha) (nm23-H6)	NME6	2.05045	1.017	2.16969	1.0183	1.33807	1.30579	0.491882	1			GOCC, MitoCarta 3.0
Q96Q11	TRNT1_HUMAN	CCA tRNA nucleotidyltransferase 1, mitochondrial, EC 2.7.7.72 (Mitochondrial tRNA nucleotidyl transferase, CCA-adding) (mt CCA-adding enzyme) (mt tRNA CCA-diphosphorylase) (mt tRNA CCA-pyrophosphorylase) (mt tRNA adenylyltransferase)	TRNT1 CGI-47	2.49778	1.13736	3.5413	1.07477	0.881329	1.23755	0.154273	1			GOCC, MitoCarta 3.0
Q8NI60	COQ8A_HUMAN	Atypical kinase COQ8A, mitochondrial, EC 2.7.-.- (Chaperone activity of bc1 complex-like, Chaperone-ABC1-like) (Coenzyme Q protein 8A) (aarF domain-containing protein kinase 3)	COQ8A ADCK3 CABC1 PP265	1.60182	1.51127	2.34894	1.30362	1.55464	1.4277	0.87981	1			GOCC, MitoCarta 3.0
Q96E11	RRFM_HUMAN	Ribosome-recycling factor, mitochondrial, RRF (Ribosome-releasing factor, mitochondrial)	MRRF	1.38107	1.14205	1.73287	1.14467	1.05208	1.07908	0.216937	1			GOCC, MitoCarta 3.0
Q9H8M1	CQ10B_HUMAN	Coenzyme Q-binding protein COQ10 homolog B, mitochondrial	COQ10B	1.78886	1.64109	1.27878	1.10422	1.22649	1.29648	0.468213	1			GOCC, MitoCarta 3.0
Q32NB8	PGPS1_HUMAN	CDP-diacylglycerol--glycerol-3-phosphate 3-phosphatidyltransferase, mitochondrial, EC 2.7.8.5 (Phosphatidylglycerophosphate synthase 1, PGP synthase 1)	PGS1	2.06132	1.12275	1.73608	1.12026	0.974164	1.07217	0.133288	1			GOCC, MitoCarta 3.0
Q9NVS2	RT18A_HUMAN	39S ribosomal protein S18a, mitochondrial, MRP-S18-a, Mrps18a, S18mt-a (39S ribosomal protein S18-3, mitochondrial, MRP-S18-3) (Mitochondrial large ribosomal subunit protein bS18a) (Mitochondrial large ribosomal subunit protein mL66)	MRPS18A	1.23128	1.00913	1.3997	1.04623	1.04575	1.1071	0.158466	1			GOCC, MitoCarta 3.0
Q8WWV3	RT4I1_HUMAN	Reticulon-4-interacting protein 1, mitochondrial (NOGO-interacting mitochondrial protein)	RTN4IP1 NIMP	1.94508	1.80122	1.60327	0.927134	1.21131	1.06636	0.162873	1			GOCC, MitoCarta 3.0
P78549	NTH_HUMAN	Endonuclease III-like protein 1, hNTH1, EC 3.2.2.-, EC 4.2.99.18 (Bifunctional DNA N-glycosylase/DNA-(apurinic or apyrimidinic site) lyase, DNA glycosylase/AP lyase)	NTHL1 NTH1 OCTS3	1.37564	1.17698	1.26477	0.980988	1.07121	0.930767	-0.0140406	1			GOCC, MitoCarta 3.0
Q96EY8	MMAB_HUMAN	Corrinoid adenosyltransferase MMAB, EC 2.5.1.- (ATP:co(I)rrinoid adenosyltransferase MMAB) (Methylmalonic aciduria type B protein)	MMAB	1.33939	1.20106	1.50575	0.938016	1.0412	1.10408	0.0675477	1			GOCC, MitoCarta 3.0
Q9BUB7	TMM70_HUMAN	Transmembrane protein 70, mitochondrial	TMEM70	1.85365	1.147	1.31462	1.23688	1.03708	1.16237	0.334904	1			GOCC, MitoCarta 3.0
P82932	RT06_HUMAN	28S ribosomal protein S6, mitochondrial, MRP-S6, S6mt (Mitochondrial small ribosomal subunit protein bS6m)	MRPS6 C21orf101 RPMS6	2.37236	1.02167	1.17788	0.92756	1.11863	1.12858	0.139649	1			GOCC, MitoCarta 3.0
Q9Y3D5	RT18C_HUMAN	28S ribosomal protein S18c, mitochondrial, MRP-S18-c, Mrps18-c, S18mt-c (28S ribosomal protein S18-1, mitochondrial, MRP-S18-1) (Mitochondrial small ribosomal subunit protein bS18c) (Mitochondrial small ribosomal subunit protein bS18m)	MRPS18C CGI-134	1.44836	1.42675	1.29903	1.04147	1.37368	1.04171	0.349592	1			GOCC, MitoCarta 3.0
O95169	NDUB8_HUMAN	NADH dehydrogenase [ubiquinone] 1 beta subcomplex subunit 8, mitochondrial (Complex I-ASHI, CI-ASHI) (NADH-ubiquinone oxidoreductase ASHI subunit)	NDUFB8	1.47246	1.41359	1.54112	1.17521	0.954914	1.30425	0.333494	1			GOCC, MitoCarta 3.0
P03915	NU5M_HUMAN	NADH-ubiquinone oxidoreductase chain 5, EC 7.1.1.2 (NADH dehydrogenase subunit 5)	MT-ND5 MTND5 NADH5 ND5	2.20207	1.97266	1.66901	1.54815	0.888945	1.81503	0.860263	1			GOCC, MitoCarta 3.0
Q9Y375	CIA30_HUMAN	Complex I intermediate-associated protein 30, mitochondrial (NADH dehydrogenase [ubiquinone] 1 alpha subcomplex assembly factor 1)	NDUFAF1 CIA30 CGI-65	1.99724	1.64447	1.61663	0.962344	1.00597	1.2918	0.205075	1			GOCC, MitoCarta 3.0
Q9HA92	RSAD1_HUMAN	Radical S-adenosyl methionine domain-containing protein 1, mitochondrial (Putative heme chaperone)	RSAD1	2.37773	1.11188	2.03343	1.16569	1.40217	1.25104	0.595241	1			GOCC, MitoCarta 3.0
Q15118	PDK1_HUMAN	[Pyruvate dehydrogenase (acetyl-transferring)] kinase isozyme 1, mitochondrial, EC 2.7.11.2 (Pyruvate dehydrogenase kinase isoform 1, PDH kinase 1)	PDK1 PDHK1	1.12084	1.24176	2.28369	1.24868	1.46766	1.53692	0.860926	1			GOCC, MitoCarta 3.0
Q9H2D1	MFTC_HUMAN	Mitochondrial folate transporter/carrier (Solute carrier family 25 member 32)	SLC25A32 MFT MFTC	1.37307	1.71459	1.22788	1.16274	0.933458	1.05231	0.119165	1			GOCC, MitoCarta 3.0
Q16595	FRDA_HUMAN	Frataxin, mitochondrial, EC 1.16.3.1 (Friedreich ataxia protein, Fxn) [Cleaved into: Frataxin intermediate form, i-FXN; Frataxin(56-210) (m56-FXN); Frataxin(78-210) (d-FXN) (m78-FXN); Frataxin mature form (Frataxin(81-210)) (m81-FXN) ]	FXN FRDA X25	2.46676	1.11326	2.48974	0.965307	0.936298	1.01048	-0.0733534	1			GOCC, MitoCarta 3.0
Q6IN84	MRM1_HUMAN	rRNA methyltransferase 1, mitochondrial, EC 2.1.1.- (16S rRNA (guanosine(1145)-2'-O)-methyltransferase) (16S rRNA [Gm1145] 2'-O-methyltransferase)	MRM1	1.39161	1.0525	1.57168	1.12756	1.22364	1.11618	0.357098	1			GOCC, MitoCarta 3.0
Q96CM3	RUSD4_HUMAN	Pseudouridylate synthase RPUSD4, mitochondrial, EC 5.4.99.- (RNA pseudouridylate synthase domain-containing protein 4)	RPUSD4	1.95818	1.63435	1.25256	1.11684	1.13166	1.22933	0.364519	1			GOCC, MitoCarta 3.0
Q9Y3D7	TIM16_HUMAN	Mitochondrial import inner membrane translocase subunit TIM16 (Mitochondria-associated granulocyte macrophage CSF-signaling molecule) (Presequence translocated-associated motor subunit PAM16)	PAM16 MAGMAS TIM16 TIMM16 CGI-136	2.1096	2.52805	1.99991	1.2272	1.25378	1.24426	0.534001	1			GOCC, MitoCarta 3.0
Q969Y2	GTPB3_HUMAN	tRNA modification GTPase GTPBP3, mitochondrial (GTP-binding protein 3) (Mitochondrial GTP-binding protein 1)	GTPBP3 MTGP1	1.7623	1.33462	1.7425	1.06573	1.54477	1.31121	0.660761	1			GOCC, MitoCarta 3.0
Q8IXM3	RM41_HUMAN	39S ribosomal protein L41, mitochondrial, L41mt, MRP-L41 (39S ribosomal protein L27 homolog) (Bcl-2-interacting mitochondrial ribosomal protein L41) (Cell proliferation-inducing gene 3 protein) (MRP-L27 homolog) (Mitochondrial large ribosomal subunit protein mL41)	MRPL41 BMRP MRPL27 RPML27 PIG3	1.69546	1.71651	1.1908	0.785572	1.19052	1.29851	0.216008	1			GOCC, MitoCarta 3.0
Q6UW68	TM205_HUMAN	Transmembrane protein 205	TMEM205 UNQ501/PRO1018	2.17014	2.38166	2.13777	1.38916	1.26182	1.73577	0.93714	1			MitoCarta 3.0
Q16774	KGUA_HUMAN	Guanylate kinase, EC 2.7.4.8 (GMP kinase) (Guanylate kinase 1)	GUK1 GMK GMPK	1.78473	2.41001	1.95951	0.943752	1.01719	0.969117	-0.0581828	1			MitoCarta 3.0
Q9UGM6	SYWM_HUMAN	Tryptophan--tRNA ligase, mitochondrial, EC 6.1.1.2 ((Mt)TrpRS) (Tryptophanyl-tRNA synthetase, TrpRS)	WARS2	1.35763	1.49799	1.17716	1.59147	1.26585	0.942733	0.583039	1			GOCC, MitoCarta 3.0
Q13686	ALKB1_HUMAN	Nucleic acid dioxygenase ALKBH1, EC 1.14.11.- (Alkylated DNA repair protein alkB homolog 1) (Alpha-ketoglutarate-dependent dioxygenase ABH1) (DNA 6mA demethylase) (DNA N6-methyl adenine demethylase ALKBH1, EC 1.14.11.51) (DNA lyase ABH1, EC 4.2.99.18) (DNA oxidative demethylase ALKBH1, EC 1.14.11.33) (mRNA N(3)-methylcytidine demethylase, EC 1.14.11.-)	ALKBH1 ABH ABH1 ALKBH	1.11046	1.34232	1.19336	0.892847	1.36939	1.10652	0.285928	1			GOCC, MitoCarta 3.0
Q9Y2Z9	COQ6_HUMAN	Ubiquinone biosynthesis monooxygenase COQ6, mitochondrial, EC 1.14.13.- (Coenzyme Q10 monooxygenase 6)	COQ6 CGI-10	2.37804	1.00591	1.42344	1.10393	1.03451	1.24576	0.297197	1			GOCC, MitoCarta 3.0
O43819	SCO2_HUMAN	Protein SCO2 homolog, mitochondrial	SCO2	1.99176	2.05801	2.07784	0.874539	0.852875	1.12228	-0.12677	1			GOCC, MitoCarta 3.0
Q96C01	F136A_HUMAN	Protein FAM136A	FAM136A	1.86765	2.11617	2.56605	0.764295	0.686012	0.939054	-0.561297	1			MitoCarta 3.0
P10109	ADX_HUMAN	Adrenodoxin, mitochondrial (Adrenal ferredoxin) (Ferredoxin-1) (Hepatoredoxin)	FDX1 ADX	2.8805	1.01864	1.38953	1.00074	1.07035	1.12189	0.153755	1			GOCC, MitoCarta 3.0
Q9Y3B1	PLD3B_HUMAN	PRELI domain containing protein 3B (Protein slowmo homolog 2)	PRELID3B C20orf45 SLMO2 CGI-107	1.11036	1.09509	2.23696	0.753476	0.717837	1.12085	-0.360375	1			GOCC, MitoCarta 3.0
P19367	HXK1_HUMAN	Hexokinase-1, EC 2.7.1.1 (Brain form hexokinase) (Hexokinase type I, HK I) (Hexokinase-A)	HK1	1.75295	1.08998	1.39878	1.1782	1.20629	1.29626	0.504375	1			GOCC
P16435	NCPR_HUMAN	NADPH--cytochrome P450 reductase, CPR, P450R, EC 1.6.2.4	POR CYPOR	1.51839	1.43578	1.26061	1.01234	1.01658	0.955516	-0.012828	1			GOCC
P52789	HXK2_HUMAN	Hexokinase-2, EC 2.7.1.1 (Hexokinase type II, HK II) (Hexokinase-B) (Muscle form hexokinase)	HK2	1.73869	1.2717	1.2916	0.897819	1.13711	1.0992	0.10787	1			GOCC
P27824	CALX_HUMAN	Calnexin (IP90) (Major histocompatibility complex class I antigen-binding protein p88) (p90)	CANX	1.22057	1.49774	1.09445	1.15287	0.929042	0.871278	-0.0387856	1			GOCC
P32189	GLPK_HUMAN	Glycerol kinase, GK, Glycerokinase, EC 2.7.1.30 (ATP:glycerol 3-phosphotransferase)	GK	1.87353	1.34106	1.16218	1.10576	1.17138	1.23471	0.388515	1			GOCC
Q13637	RAB32_HUMAN	Ras-related protein Rab-32	RAB32	2.26139	1.93392	1.11597	1.10201	0.891971	1.26108	0.201252	1			GOCC
Q99536	VAT1_HUMAN	Synaptic vesicle membrane protein VAT-1 homolog, EC 1.-.-.-	VAT1	1.58576	1.64394	1.76963	1.07578	1.0412	0.987928	0.0847702	1			GOCC
Q8NBX0	SCPDL_HUMAN	Saccharopine dehydrogenase-like oxidoreductase, EC 1.-.-.-	SCCPDH CGI-49	1.77403	1.15259	1.83237	1.15799	0.843893	0.933988	-0.0532902	1			GOCC
Q9NX46	ADPRS_HUMAN	ADP-ribosylhydrolase ARH3 (ADP-ribose glycohydrolase ARH3) (ADP-ribosylhydrolase 3) (O-acetyl-ADP-ribose deacetylase ARH3, EC 3.5.1.-) (Poly(ADP-ribose) glycohydrolase ARH3, EC 3.2.1.143) ([Protein ADP-ribosylarginine] hydrolase-like protein 2) ([Protein ADP-ribosylserine] hydrolase, EC 3.2.2.-)	ADPRS ADPRHL2 ARH3	2.24328	1.94135	1.96703	1.15776	1.08042	1.10368	0.266151	1			GOCC
Q8N3Z3	GTPB8_HUMAN	GTP-binding protein 8	GTPBP8	1.68934	1.99266	1.25095	1.03555	1.33914	1.23502	0.456306	1			GOCC
P35613	BASI_HUMAN	Basigin (5F7) (Collagenase stimulatory factor) (Extracellular matrix metalloproteinase inducer, EMMPRIN) (Hepatoma-associated antigen, HAb18G) (Leukocyte activation antigen M6) (OK blood group antigen) (Tumor cell-derived collagenase stimulatory factor, TCSF) (CD antigen CD147)	BSG UNQ6505/PRO21383	1.63475	2.42596	1.27678	1.28524	1.00442	0.991297	0.220786	1			GOCC
Q9H974	QTRT2_HUMAN	Queuine tRNA-ribosyltransferase accessory subunit 2 (Queuine tRNA-ribosyltransferase domain-containing protein 1)	QTRT2 QTRTD1	1.23692	1.3756	1.33028	0.998202	1.1992	1.26607	0.354306	1			GOCC
Q8NEJ9	NGDN_HUMAN	Neuroguidin (Centromere accumulated nuclear protein 1, CANu1) (EIF4E-binding protein)	NGDN C14orf120	1.39052	1.23497	1.76709	0.979525	1.12982	1.03005	0.112012	1			GOCC
O95674	CDS2_HUMAN	Phosphatidate cytidylyltransferase 2, EC 2.7.7.41 (CDP-DAG synthase 2) (CDP-DG synthase 2) (CDP-diacylglycerol synthase 2, CDS 2) (CDP-diglyceride pyrophosphorylase 2) (CDP-diglyceride synthase 2) (CTP:phosphatidate cytidylyltransferase 2)	CDS2	1.45864	1.12763	1.57286	1.22997	1.05944	1.261	0.415457	1			GOCC
O00165	HAX1_HUMAN	HCLS1-associated protein X-1 (HS1-associating protein X-1, HAX-1) (HS1-binding protein 1, HSP1BP-1)	HAX1 HS1BP1	2.88291	2.71944	2.51242	0.968495	0.769052	0.838276	-0.37597	1			GOCC
Q99417	MYCBP_HUMAN	c-Myc-binding protein (Associate of Myc 1, AMY-1)	MYCBP AMY1	2.5609	1.48515	1.52329	0.708928	0.894456	0.672769	-0.681009	1			GOCC
P40939	ECHA_HUMAN	Trifunctional enzyme subunit alpha, mitochondrial (78 kDa gastrin-binding protein) (Monolysocardiolipin acyltransferase, EC 2.3.1.-) (TP-alpha) [Includes: Long-chain enoyl-CoA hydratase, EC 4.2.1.17; Long chain 3-hydroxyacyl-CoA dehydrogenase, EC 1.1.1.211 ]	HADHA HADH	1.52783	1.44106	0.757989	1.38862	1.681	1.37618	0.970121	1			GOCC, MitoCarta 3.0
P36776	LONM_HUMAN	Lon protease homolog, mitochondrial, EC 3.4.21.53 (LONHs) (Lon protease-like protein, LONP) (Mitochondrial ATP-dependent protease Lon) (Serine protease 15)	LONP1 PRSS15	1.71308	1.1842	0.955655	1.36274	1.97046	1.5874	1.22037	1			GOCC, MitoCarta 3.0
Q9NSE4	SYIM_HUMAN	Isoleucine--tRNA ligase, mitochondrial, EC 6.1.1.5 (Isoleucyl-tRNA synthetase, IleRS)	IARS2	1.54796	1.34525	0.722686	1.26712	1.72454	1.25479	0.85697	1			GOCC, MitoCarta 3.0
Q9UDR5	AASS_HUMAN	Alpha-aminoadipic semialdehyde synthase, mitochondrial (LKR/SDH) [Includes: Lysine ketoglutarate reductase, LKR, LOR, EC 1.5.1.8; Saccharopine dehydrogenase, SDH, EC 1.5.1.9 ]	AASS	1.46676	1.30457	0.930601	1.17859	1.41308	1.29485	0.638529	1			GOCC, MitoCarta 3.0
P43155	CACP_HUMAN	Carnitine O-acetyltransferase, Carnitine acetylase, EC 2.3.1.137, EC 2.3.1.7 (Carnitine acetyltransferase, CAT, CrAT)	CRAT CAT1	1.75184	1.49383	0.974393	1.17673	1.41026	1.4147	0.710548	1			GOCC, MitoCarta 3.0
P23368	MAOM_HUMAN	NAD-dependent malic enzyme, mitochondrial, NAD-ME, EC 1.1.1.38 (Malic enzyme 2)	ME2	2.45414	1.09172	0.786208	1.26906	1.69776	1.34886	0.896855	1			GOCC, MitoCarta 3.0
Q96EY7	PTCD3_HUMAN	Pentatricopeptide repeat domain-containing protein 3, mitochondrial (28S ribosomal protein S39, mitochondrial, MRP-S39) (Mitochondrial small ribosomal subunit protein mS39) (Transformation-related gene 15 protein, TRG-15)	PTCD3 MRPS39 TRG15	1.75574	1.09064	0.653868	1.09505	1.36815	1.209	0.498639	1			GOCC, MitoCarta 3.0
Q9NVI7	ATD3A_HUMAN	ATPase family AAA domain-containing protein 3A	ATAD3A	1.12105	1.23267	0.738644	1.23482	1.15146	1.189	0.432662	1			GOCC, MitoCarta 3.0
Q9Y276	BCS1_HUMAN	Mitochondrial chaperone BCS1, h-BCS1 (BCS1-like protein)	BCS1L BCS1	1.57836	2.676	0.490979	1.2926	1.27583	1.23069	0.582435	1			GOCC, MitoCarta 3.0
P09622	DLDH_HUMAN	Dihydrolipoyl dehydrogenase, mitochondrial, EC 1.8.1.4 (Dihydrolipoamide dehydrogenase) (Glycine cleavage system L protein)	DLD GCSL LAD PHE3	1.25307	1.43737	0.875832	1.14141	1.15553	1.06838	0.283406	1			GOCC, MitoCarta 3.0
Q9H7Z7	PGES2_HUMAN	Prostaglandin E synthase 2, EC 5.3.99.3 (Membrane-associated prostaglandin E synthase-2, mPGE synthase-2) (Microsomal prostaglandin E synthase 2, mPGES-2) (Prostaglandin-H(2) E-isomerase) [Cleaved into: Prostaglandin E synthase 2 truncated form ]	PTGES2 C9orf15 PGES2	1.90582	1.33133	0.74223	1.14663	1.02873	1.05938	0.185799	1			GOCC, MitoCarta 3.0
Q08257	QOR_HUMAN	Quinone oxidoreductase, EC 1.6.5.5 (NADPH:quinone reductase) (Zeta-crystallin)	CRYZ	1.68732	1.3701	0.989553	1.09338	1.11905	0.960049	0.137867	1			MitoCarta 3.0
Q96CM8	ACSF2_HUMAN	Medium-chain acyl-CoA ligase ACSF2, mitochondrial, EC 6.2.1.2	ACSF2 UNQ493/PRO1009	1.66954	1.29285	-0.632557	1.51988	1.82623	1.587	1.22664	1			GOCC, MitoCarta 3.0
Q5ST30	SYVM_HUMAN	Valine--tRNA ligase, mitochondrial, EC 6.1.1.9 (Valyl-tRNA synthetase, ValRS) (Valyl-tRNA synthetase-like)	VARS2 KIAA1885 VARS2L VARSL	1.60116	1.09763	0.904165	1.26582	1.72298	1.33974	0.904194	1			GOCC, MitoCarta 3.0
Q9NP81	SYSM_HUMAN	Serine--tRNA ligase, mitochondrial, EC 6.1.1.11 (SerRSmt) (Seryl-tRNA synthetase, SerRS) (Seryl-tRNA(Ser/Sec) synthetase)	SARS2 SARSM	1.25923	1.09845	0.424583	0.954916	1.20808	1.20348	0.284247	1			GOCC, MitoCarta 3.0
Q96DV4	RM38_HUMAN	39S ribosomal protein L38, mitochondrial, L38mt, MRP-L38 (Mitochondrial large ribosomal subunit protein mL38)	MRPL38 HSPC262	1.40045	1.20169	0.739688	1.1084	1.22111	1.11766	0.342666	1			GOCC, MitoCarta 3.0
Q8IYB8	SUV3_HUMAN	ATP-dependent RNA helicase SUPV3L1, mitochondrial, EC 3.6.4.13 (Suppressor of var1 3-like protein 1, SUV3-like protein 1)	SUPV3L1 SUV3	2.1063	1.52114	0.668483	1.18883	1.35075	1.37685	0.657438	1			GOCC, MitoCarta 3.0
Q9H9B4	SFXN1_HUMAN	Sideroflexin-1	SFXN1	1.43315	1.40409	0.635181	1.06108	1.13908	1.16341	0.282117	1			GOCC, MitoCarta 3.0
Q99623	PHB2_HUMAN	Prohibitin-2 (B-cell receptor-associated protein BAP37) (D-prohibitin) (Repressor of estrogen receptor activity)	PHB2 BAP REA	1.32732	1.00777	0.992975	1.02484	1.00225	1.01416	0.0336821	1			GOCC, MitoCarta 3.0
Q9UJS0	CMC2_HUMAN	Calcium-binding mitochondrial carrier protein Aralar2 (Citrin) (Mitochondrial aspartate glutamate carrier 2) (Solute carrier family 25 member 13)	SLC25A13 ARALAR2	1.47777	1.68306	0.80347	1.1799	0.890692	1.10953	0.143805	1			GOCC, MitoCarta 3.0
O15382	BCAT2_HUMAN	Branched-chain-amino-acid aminotransferase, mitochondrial, BCAT(m), EC 2.6.1.42 (Placental protein 18, PP18)	BCAT2 BCATM BCT2 ECA40	2.10656	2.30825	0.593568	1.17437	0.998994	1.31091	0.369079	1			GOCC, MitoCarta 3.0
Q15031	SYLM_HUMAN	Leucine--tRNA ligase, mitochondrial, EC 6.1.1.4 (Leucyl-tRNA synthetase, LeuRS)	LARS2 KIAA0028	1.2873	1.58551	0.733739	1.09077	1.74458	1.35045	0.821487	1			GOCC, MitoCarta 3.0
Q00059	TFAM_HUMAN	Transcription factor A, mitochondrial, mtTFA (Mitochondrial transcription factor 1, MtTF1) (Transcription factor 6, TCF-6) (Transcription factor 6-like 2)	TFAM TCF6 TCF6L2	1.57882	1.29762	0.953319	1.25511	1.30485	1.13435	0.51344	1			GOCC, MitoCarta 3.0
Q9Y2Z4	SYYM_HUMAN	Tyrosine--tRNA ligase, mitochondrial, EC 6.1.1.1 (Tyrosyl-tRNA synthetase, TyrRS)	YARS2 CGI-04	2.30824	1.7693	0.890472	1.15287	1.31887	1.26676	0.542767	1			GOCC, MitoCarta 3.0
P46199	IF2M_HUMAN	Translation initiation factor IF-2, mitochondrial, IF-2(Mt), IF-2Mt, IF2(mt)	MTIF2	1.39143	1.13501	0.31899	1.1759	1.10128	1.33567	0.458444	1			GOCC, MitoCarta 3.0
P11177	ODPB_HUMAN	Pyruvate dehydrogenase E1 component subunit beta, mitochondrial, PDHE1-B, EC 1.2.4.1	PDHB PHE1B	1.07265	1.29194	0.855561	1.20095	1.19888	1.29669	0.514913	1			GOCC, MitoCarta 3.0
Q9UJZ1	STML2_HUMAN	Stomatin-like protein 2, mitochondrial, SLP-2 (EPB72-like protein 2) (Paraprotein target 7, Paratarg-7)	STOML2 SLP2 HSPC108	1.83713	1.45467	0.0478169	0.978984	1.02967	1.22501	0.184981	1			GOCC, MitoCarta 3.0
P36542	ATPG_HUMAN	ATP synthase subunit gamma, mitochondrial (ATP synthase F1 subunit gamma) (F-ATPase gamma subunit)	ATP5F1C ATP5C ATP5C1 ATP5CL1	1.89267	1.31886	0.176925	1.50788	1.20082	1.26199	0.691373	1			GOCC, MitoCarta 3.0
Q9Y3D9	RT23_HUMAN	28S ribosomal protein S23, mitochondrial, MRP-S23, S23mt (Mitochondrial small ribosomal subunit protein mS23)	MRPS23 CGI-138 HSPC329	2.1016	1.8525		1.05593	1.36876	1.16527	0.442771	1			GOCC, MitoCarta 3.0
A3KMH1	VWA8_HUMAN	von Willebrand factor A domain-containing protein 8 (PEX7-binding protein 2, P7BP2)	VWA8 KIAA0564	1.08397	1.45823	0.685195	1.05693	1.47444	1.35431	0.637992	1			GOCC, MitoCarta 3.0
Q9HC36	MRM3_HUMAN	rRNA methyltransferase 3, mitochondrial, EC 2.1.1.- (16S rRNA (guanosine(1370)-2'-O)-methyltransferase) (16S rRNA [Gm1370] 2'-O-methyltransferase) (RNA methyltransferase-like protein 1)	MRM3 RNMTL1 HC90	1.1426	1.63448	-0.124078	0.947042	1.01591	1.07128	0.02798	1			GOCC, MitoCarta 3.0
Q9GZT3	SLIRP_HUMAN	SRA stem-loop-interacting RNA-binding protein, mitochondrial	SLIRP C14orf156 DC23 DC50 PD04872	1.07698	1.48768	0.281616	1.00985	1.25269	1.03554	0.233625	1			GOCC, MitoCarta 3.0
Q9NRK6	ABCBA_HUMAN	ATP-binding cassette sub-family B member 10, mitochondrial (ABC-mitochondrial erythroid protein, ABC-me protein) (ATP-binding cassette transporter 10, ABC transporter 10 protein) (Mitochondrial ATP-binding cassette 2, M-ABC2)	ABCB10	1.35181	1.43412	0.511954	0.989216	0.912029	1.11515	0.0134414	1			GOCC, MitoCarta 3.0
O43464	HTRA2_HUMAN	Serine protease HTRA2, mitochondrial, EC 3.4.21.108 (High temperature requirement protein A2, HtrA2) (Omi stress-regulated endoprotease) (Serine protease 25) (Serine proteinase OMI)	HTRA2 OMI PRSS25	1.40162	1.90111	-0.0669793	1.18853	1.00421	1.1353	0.255936	1			GOCC, MitoCarta 3.0
Q6P1L8	RM14_HUMAN	39S ribosomal protein L14, mitochondrial, L14mt, MRP-L14 (39S ribosomal protein L32, mitochondrial, L32mt, MRP-L32) (Mitochondrial large ribosomal subunit protein uL14m)	MRPL14 MRPL32 RPML32	1.14047	1.60966	0.863383	1.04009	1.1992	1.15886	0.307347	1			GOCC, MitoCarta 3.0
P12694	ODBA_HUMAN	2-oxoisovalerate dehydrogenase subunit alpha, mitochondrial, EC 1.2.4.4 (Branched-chain alpha-keto acid dehydrogenase E1 component alpha chain, BCKDE1A, BCKDH E1-alpha)	BCKDHA	1.80203	1.80386		1.05211	1.35555	1.48582	0.642944	1			GOCC, MitoCarta 3.0
Q99797	MIPEP_HUMAN	Mitochondrial intermediate peptidase, MIP, EC 3.4.24.59	MIPEP MIP	1.15382	1.59591	0.693342	1.03383	1.70452	1.20208	0.672505	1			GOCC, MitoCarta 3.0
P82664	RT10_HUMAN	28S ribosomal protein S10, mitochondrial, MRP-S10, S10mt (Mitochondrial small ribosomal subunit protein uS10m)	MRPS10 MSTP040	1.04873	1.20992		1.35027	1.46799	1.61059	0.960693	1			GOCC, MitoCarta 3.0
Q6P1X6	CH082_HUMAN	UPF0598 protein C8orf82	C8orf82	2.25569	1.41701	-1.11406	1.09106	1.27545	1.05486	0.324142	1			MitoCarta 3.0
Q9Y399	RT02_HUMAN	28S ribosomal protein S2, mitochondrial, MRP-S2, S2mt (Mitochondrial small ribosomal subunit protein uS2m)	MRPS2 CGI-91	2.29404	2.24108		1.06516	1.09695	1.23392	0.305816	1			GOCC, MitoCarta 3.0
Q9BYD6	RM01_HUMAN	39S ribosomal protein L1, mitochondrial, L1mt, MRP-L1 (Mitochondrial large ribosomal subunit protein uL1m)	MRPL1 BM-022	1.02047	1.37291	0.632009	1.05034	1.15014	1.20755	0.314515	1			GOCC, MitoCarta 3.0
Q8NCW5	NNRE_HUMAN	NAD(P)H-hydrate epimerase, EC 5.1.99.6 (Apolipoprotein A-I-binding protein, AI-BP) (NAD(P)HX epimerase) (YjeF N-terminal domain-containing protein 1, YjeF_N1)	NAXE AIBP APOA1BP YJEFN1	1.45576	1.06603	0.765759	1.06601	1.1721	1.24033	0.36494	1			GOCC, MitoCarta 3.0
Q4G176	ACSF3_HUMAN	Malonate--CoA ligase ACSF3, mitochondrial, EC 6.2.1.n3 (Acyl-CoA synthetase family member 3)	ACSF3 PSEC0197	1.48098	1.46304	0.870046	1.14654	1.67791	1.38067	0.832847	1			GOCC, MitoCarta 3.0
Q16718	NDUA5_HUMAN	NADH dehydrogenase [ubiquinone] 1 alpha subcomplex subunit 5 (Complex I subunit B13) (Complex I-13kD-B, CI-13kD-B) (NADH-ubiquinone oxidoreductase 13 kDa-B subunit)	NDUFA5	2.3956	1.07457	0.210289	1.14647	1.06421	1.25913	0.358822	1			GOCC, MitoCarta 3.0
Q96GW9	SYMM_HUMAN	Methionine--tRNA ligase, mitochondrial, EC 6.1.1.10 (Methionyl-tRNA synthetase 2) (Mitochondrial methionyl-tRNA synthetase, MtMetRS)	MARS2	1.07938	1.09545	0.481686	1.07571	1.35319	1.15238	0.436798	1			GOCC, MitoCarta 3.0
Q9NX47	MARH5_HUMAN	E3 ubiquitin-protein ligase MARCHF5, EC 2.3.2.27 (Membrane-associated RING finger protein 5) (Membrane-associated RING-CH protein V, MARCH-V) (Mitochondrial ubiquitin ligase, MITOL) (RING finger protein 153) (RING-type E3 ubiquitin transferase MARCHF5)	MARCHF5 MARCH5 RNF153	1.28472	1.20207	0.189968	1.03455	0.850586	0.979964	-0.11347	1			GOCC, MitoCarta 3.0
Q9H4B0	OSGL1_HUMAN	tRNA N6-adenosine threonylcarbamoyltransferase, mitochondrial, EC 2.3.1.234 (N6-L-threonylcarbamoyladenine synthase, t(6)A synthase) (O-sialoglycoprotein endopeptidase-like protein 1, OSGEP-like protein 1) (t(6)A37 threonylcarbamoyladenosine biosynthesis protein OSGEPL1) (tRNA threonylcarbamoyladenosine biosynthesis protein OSGEPL1)	OSGEPL1 GCP1	1.23211	1.32176	-0.485947	0.939763	1.24608	1.21293	0.307798	1			GOCC, MitoCarta 3.0
O75431	MTX2_HUMAN	Metaxin-2 (Mitochondrial outer membrane import complex protein 2)	MTX2	1.1027	1.34726	0.722984	1.0804	1.19014	1.18964	0.351962	1			GOCC, MitoCarta 3.0
P16260	GDC_HUMAN	Graves disease carrier protein, GDC (Graves disease autoantigen, GDA) (Mitochondrial solute carrier protein homolog) (Solute carrier family 25 member 16)	SLC25A16 GDA	2.29492	1.53887	0.86714	1.14023	0.885752	1.05969	0.0694446	1			GOCC, MitoCarta 3.0
Q9HA77	SYCM_HUMAN	Probable cysteine--tRNA ligase, mitochondrial, EC 6.1.1.16 (Cysteinyl-tRNA synthetase, CysRS)	CARS2 OK/SW-cl.10	1.80344	1.41464		1.27074	1.28606	1.16185	0.529631	1			GOCC, MitoCarta 3.0
P82912	RT11_HUMAN	28S ribosomal protein S11, mitochondrial, MRP-S11, S11mt (Cervical cancer proto-oncogene 2 protein, HCC-2) (Mitochondrial small ribosomal subunit protein uS11m)	MRPS11 RPMS11 HCC2	2.70829	2.24877		1.01308	1.27324	1.09215	0.29302	1			GOCC, MitoCarta 3.0
Q96CB9	NSUN4_HUMAN	5-methylcytosine rRNA methyltransferase NSUN4, EC 2.1.1.- (5-methylcytosine tRNA methyltransferase NSUN4, EC 2.1.1.-) (NOL1/NOP2/Sun domain family member 4)	NSUN4	2.50018	1.59433	0.510625	1.21325	1.18192	1.08556	0.366563	1			GOCC, MitoCarta 3.0, PubMed: 21531335
P51970	NDUA8_HUMAN	NADH dehydrogenase [ubiquinone] 1 alpha subcomplex subunit 8 (Complex I-19kD, CI-19kD) (Complex I-PGIV, CI-PGIV) (NADH-ubiquinone oxidoreductase 19 kDa subunit)	NDUFA8	1.72631	1.85499	0.40573	0.92288	0.804503	1.0411	-0.198078	1			GOCC, MitoCarta 3.0
Q13232	NDK3_HUMAN	Nucleoside diphosphate kinase 3, NDK 3, NDP kinase 3, EC 2.7.4.6 (DR-nm23) (Nucleoside diphosphate kinase C, NDPKC) (nm23-H3)	NME3	1.33874	2.13497	0.720267	1.00208	1.00318	1.10533	0.0892858	1			MitoCarta 3.0
Q9Y6I8	PXMP4_HUMAN	Peroxisomal membrane protein 4 (24 kDa peroxisomal intrinsic membrane protein)	PXMP4 PMP24	2.89768	2.67864		1.10183	0.98074	1.3732	0.348814	1			MitoCarta 3.0
Q9NPE2	NGRN_HUMAN	Neugrin (Mesenchymal stem cell protein DSC92) (Neurite outgrowth-associated protein) (Spinal cord-derived protein FI58G)	NGRN FI58G HT020	1.45368	1.03018	0.316459	1.08583	1.10112	1.30911	0.377402	1			GOCC, MitoCarta 3.0
Q7KZN9	COX15_HUMAN	Cytochrome c oxidase assembly protein COX15 homolog	COX15	1.9889	1.64767	0.795518	1.29921	0.847543	1.1054	0.199043	1			GOCC, MitoCarta 3.0
Q96HP4	OXND1_HUMAN	Oxidoreductase NAD-binding domain-containing protein 1, EC 1.-.-.-	OXNAD1	1.58206	1.03241	0.950989	1.12825	1.13702	1.17242	0.335877	1			MitoCarta 3.0
Q5VWZ2	LYPL1_HUMAN	Lysophospholipase-like protein 1, EC 3.1.2.22	LYPLAL1	1.46255	1.46784	0.0462304	1.05205	1.28307	1.17447	0.386924	1			MitoCarta 3.0
P56134	ATPK_HUMAN	ATP synthase subunit f, mitochondrial (ATP synthase membrane subunit f)	ATP5MF ATP5J2 ATP5JL	2.29921	1.0293	0.585836	1.07375	0.933433	0.943082	-0.0412284	1			GOCC, MitoCarta 3.0
Q9Y2Z2	MTO1_HUMAN	Protein MTO1 homolog, mitochondrial	MTO1 CGI-02	1.33631	1.36732	0.850637	1.32054	1.67985	1.15573	0.803942	1			GOCC, MitoCarta 3.0
Q04837	SSBP_HUMAN	Single-stranded DNA-binding protein, mitochondrial, Mt-SSB, MtSSB (PWP1-interacting protein 17)	SSBP1 SSBP	1.2983	1.6636		0.887545	1.45398		0.388822	1			GOCC, MitoCarta 3.0
P07919	QCR6_HUMAN	Cytochrome b-c1 complex subunit 6, mitochondrial (Complex III subunit 6) (Complex III subunit VIII) (Cytochrome c1 non-heme 11 kDa protein) (Mitochondrial hinge protein) (Ubiquinol-cytochrome c reductase complex 11 kDa protein)	UQCRH	1.29347	2.52789	0.985537	1.08317	0.872371	1.10405	0.0485091	1			GOCC, MitoCarta 3.0
Q9BVV7	TIM21_HUMAN	Mitochondrial import inner membrane translocase subunit Tim21 (TIM21-like protein, mitochondrial)	TIMM21 C18orf55 TIM21 HSPC154	1.15944	1.80042		0.747776	0.81045		-0.615589	1			GOCC, MitoCarta 3.0
Q6P4A7	SFXN4_HUMAN	Sideroflexin-4 (Breast cancer resistance marker 1)	SFXN4 BCRM1	1.9033	1.62885		1.04171	1.03502		0.0928478	1			GOCC, MitoCarta 3.0
O75964	ATP5L_HUMAN	ATP synthase subunit g, mitochondrial, ATPase subunit g (ATP synthase membrane subunit g)	ATP5MG ATP5L	1.31485	1.26901	-0.0272007	1.03987	1.70028	1.28035	0.722118	1			GOCC, MitoCarta 3.0
O43181	NDUS4_HUMAN	NADH dehydrogenase [ubiquinone] iron-sulfur protein 4, mitochondrial (Complex I-18 kDa, CI-18 kDa) (Complex I-AQDQ, CI-AQDQ) (NADH-ubiquinone oxidoreductase 18 kDa subunit)	NDUFS4	2.09233	1.87291		0.931146	0.910797		-0.203041	1			GOCC, MitoCarta 3.0
Q9Y3D3	RT16_HUMAN	28S ribosomal protein S16, mitochondrial, MRP-S16, S16mt (Mitochondrial small ribosomal subunit protein bS16m)	MRPS16 RPMS16 CGI-132	1.71495	1.44828	-0.0651326	1.05451	1.34826	1.24936	0.485114	1			GOCC, MitoCarta 3.0
Q9BRQ6	MIC25_HUMAN	MICOS complex subunit MIC25 (Coiled-coil-helix cristae morphology protein 1) (Coiled-coil-helix-coiled-coil-helix domain-containing protein 6)	CHCHD6 CHCM1 MIC25	1.46652	1.62779		0.939583	0.887228	0.910911	-0.225632	1			GOCC, MitoCarta 3.0, PMID: 22228767
Q9NWR8	MCUB_HUMAN	Calcium uniporter regulatory subunit MCUb, mitochondrial, MCUb (Coiled-coil domain-containing protein 109B)	MCUB CCDC109B	2.68246	1.0915	0.975449	1.3099	0.790526	0.914166	0.0119639	1			GOCC, MitoCarta 3.0
Q96DP5	FMT_HUMAN	Methionyl-tRNA formyltransferase, mitochondrial, MtFMT, EC 2.1.2.9	MTFMT FMT FMT1	1.9282	2.26616		1.01676	1.28525		0.346844	1			GOCC, MitoCarta 3.0
P06493	CDK1_HUMAN	Cyclin-dependent kinase 1, CDK1, EC 2.7.11.22, EC 2.7.11.23 (Cell division control protein 2 homolog) (Cell division protein kinase 1) (p34 protein kinase)	CDK1 CDC2 CDC28A CDKN1 P34CDC2	1.74871	1.76801	0.76572	1.16928	0.834912	1.05196	0.0457349	1			GOCC
Q9UHQ9	NB5R1_HUMAN	NADH-cytochrome b5 reductase 1, b5R.1, EC 1.6.2.2 (Humb5R2) (NAD(P)H:quinone oxidoreductase type 3 polypeptide A2)	CYB5R1 NQO3A2 UNQ3049/PRO9865	1.23002	1.73148	0.359532	1.04686	0.968401	1.00111	0.0134245	1			GOCC
Q12981	SEC20_HUMAN	Vesicle transport protein SEC20 (BCL2/adenovirus E1B 19 kDa protein-interacting protein 1) (Transformation-related gene 8 protein, TRG-8)	BNIP1 NIP1 SEC20L TRG8	1.18802	1.13788		0.896961	0.856559	0.986047	-0.22397	1			GOCC
Q8IZ52	CHSS2_HUMAN	Chondroitin sulfate synthase 2, EC 2.4.1.175, EC 2.4.1.226 (Chondroitin glucuronyltransferase 2) (Chondroitin-polymerizing factor, ChPF) (Glucuronosyl-N-acetylgalactosaminyl-proteoglycan 4-beta-N-acetylgalactosaminyltransferase II) (N-acetylgalactosaminyl-proteoglycan 3-beta-glucuronosyltransferase II) (N-acetylgalactosaminyltransferase 2)	CHPF CSS2 UNQ651/PRO1281	1.27671	1.51263	0.982834	1.03085	1.04271	0.99039	0.0520166	1			GOCC
Q9UMX5	NENF_HUMAN	Neudesin (Cell immortalization-related protein 2) (Neuron-derived neurotrophic factor) (Protein GIG47) (Secreted protein of unknown function, SPUF protein)	NENF CIR2 SPUF	2.18362	1.51966		0.986869	0.561934		-0.630547	1			GOCC
O14786	NRP1_HUMAN	Neuropilin-1 (Vascular endothelial cell growth factor 165 receptor) (CD antigen CD304)	NRP1 NRP VEGF165R	1.15877	1.00992		1.62685	1.27875	0.964384	0.628009	1			GOCC
O00264	PGRC1_HUMAN	Membrane-associated progesterone receptor component 1, mPR (Dap1) (IZA)	PGRMC1 HPR6.6 PGRMC	1.84406	1.18121	0.825759	1.3277	0.924712	0.880872	0.107212	1			GOCC
Q12931	TRAP1_HUMAN	Heat shock protein 75 kDa, mitochondrial, HSP 75 (TNFR-associated protein 1) (Tumor necrosis factor type 1 receptor-associated protein, TRAP-1)	TRAP1 HSP75	1.07176	0.985035	1.74606	1.3637	1.38141	1.37126	0.78024	1			GOCC, MitoCarta 3.0
Q5JTZ9	SYAM_HUMAN	Alanine--tRNA ligase, mitochondrial, EC 6.1.1.7 (Alanyl-tRNA synthetase, AlaRS)	AARS2 AARSL KIAA1270	1.66423	0.931724	1.5162	1.21526	1.69271	1.30117	0.835203	1			GOCC, MitoCarta 3.0
Q96RP9	EFGM_HUMAN	Elongation factor G, mitochondrial, EF-Gmt (Elongation factor G 1, mitochondrial, mEF-G 1) (Elongation factor G1, hEFG1)	GFM1 EFG EFG1 GFM	1.10147	0.927223	1.56429	1.22336	1.58242	1.18567	0.704232	1			GOCC, MitoCarta 3.0
Q5JRX3	PREP_HUMAN	Presequence protease, mitochondrial, hPreP, EC 3.4.24.- (Pitrilysin metalloproteinase 1, Metalloprotease 1, hMP1)	PITRM1 KIAA1104 MP1 PREP	1.38178	0.608482	1.04689	1.34928	1.57334	1.23415	0.804323	1			GOCC, MitoCarta 3.0
P00505	AATM_HUMAN	Aspartate aminotransferase, mitochondrial, mAspAT, EC 2.6.1.1, EC 2.6.1.7 (Fatty acid-binding protein, FABP-1) (Glutamate oxaloacetate transaminase 2) (Kynurenine aminotransferase 4) (Kynurenine aminotransferase IV) (Kynurenine--oxoglutarate transaminase 4) (Kynurenine--oxoglutarate transaminase IV) (Plasma membrane-associated fatty acid-binding protein, FABPpm) (Transaminase A)	GOT2 KYAT4	1.14982	0.864438	1.03474	1.06261	0.933128	1.11588	0.090094	1			GOCC, MitoCarta 3.0
P22570	ADRO_HUMAN	NADPH:adrenodoxin oxidoreductase, mitochondrial, AR, Adrenodoxin reductase, EC 1.18.1.6 (Ferredoxin--NADP(+) reductase, Ferredoxin reductase)	FDXR ADXR	1.32093	0.723628	1.61526	1.19195	1.13627	1.20282	0.401959	1			GOCC, MitoCarta 3.0
O95202	LETM1_HUMAN	Mitochondrial proton/calcium exchanger protein (Leucine zipper-EF-hand-containing transmembrane protein 1)	LETM1	1.0262	0.678405	1.02835	1.03046	1.2199	1.17689	0.328382	1			GOCC, MitoCarta 3.0
Q5T9A4	ATD3B_HUMAN	ATPase family AAA domain-containing protein 3B (AAA-TOB3)	ATAD3B KIAA1273 TOB3	1.09714	0.901726	1.03985	1.2747	1.18949	1.09771	0.423417	1			GOCC, MitoCarta 3.0
P31040	SDHA_HUMAN	Succinate dehydrogenase [ubiquinone] flavoprotein subunit, mitochondrial, EC 1.3.5.1 (Flavoprotein subunit of complex II, Fp)	SDHA SDH2 SDHF	1.12509	0.55274	1.00277	1.2409	1.45768	1.23487	0.668138	1			GOCC, MitoCarta 3.0
Q9NYY8	FAKD2_HUMAN	FAST kinase domain-containing protein 2, mitochondrial	FASTKD2 KIAA0971	1.90604	0.698927	1.50092	1.15058	1.67706	1.44501	0.872137	1			GOCC, MitoCarta 3.0
P36551	HEM6_HUMAN	Oxygen-dependent coproporphyrinogen-III oxidase, mitochondrial, COX, Coprogen oxidase, Coproporphyrinogenase, EC 1.3.3.3	CPOX CPO CPX	1.16424	0.856562	1.11013	1.10515	1.14904	1.0596	0.245352	1			GOCC, MitoCarta 3.0
Q9H845	ACAD9_HUMAN	Complex I assembly factor ACAD9, mitochondrial (Acyl-CoA dehydrogenase family member 9, ACAD-9, EC 1.3.8.-)	ACAD9	1.8566	0.980508	1.93346	1.29324	1.07763	1.35307	0.533141	1			GOCC, MitoCarta 3.0
Q02127	PYRD_HUMAN	Dihydroorotate dehydrogenase (quinone), mitochondrial, DHOdehase, EC 1.3.5.2 (Dihydroorotate oxidase)	DHODH	1.24848		1.08994	1.2843	1.14998	1.11812	0.416831	1			GOCC, MitoCarta 3.0
Q9Y2R9	RT07_HUMAN	28S ribosomal protein S7, mitochondrial, MRP-S7, S7mt (Mitochondrial small ribosomal subunit protein uS7m) (bMRP-27a, bMRP27a)	MRPS7	1.09584	0.0368159	2.44209	1.17246	1.33301	1.23065	0.541186	1			GOCC, MitoCarta 3.0
O75027	ABCB7_HUMAN	Iron-sulfur clusters transporter ABCB7, mitochondrial (ATP-binding cassette sub-family B member 7, mitochondrial) (ATP-binding cassette transporter 7, ABC transporter 7 protein)	ABCB7 ABC7	1.97875	0.621244	2.28012	1.10134	1.10579	1.18994	0.306564	1			GOCC, MitoCarta 3.0
Q9Y2Q3	GSTK1_HUMAN	Glutathione S-transferase kappa 1, EC 2.5.1.18 (GST 13-13) (GST class-kappa) (GSTK1-1, hGSTK1) (Glutathione S-transferase subunit 13)	GSTK1 HDCMD47P	2.46762	0.863754	1.0801	1.46408	1.26915	1.26363	0.707574	1			GOCC, MitoCarta 3.0
Q9NUJ1	ABHDA_HUMAN	Palmitoyl-protein thioesterase ABHD10, mitochondrial, EC 3.1.2.22 (Acyl-protein thioesterase ABHD10) (Alpha/beta hydrolase domain-containing protein 10, Abhydrolase domain-containing protein 10) (Mycophenolic acid acyl-glucuronide esterase, mitochondrial, EC 3.1.1.93)	ABHD10	2.74017	0.63206	1.22821	1.29031	1.03058	1.12294	0.340286	1			GOCC, MitoCarta 3.0
Q9H857	NT5D2_HUMAN	5'-nucleotidase domain-containing protein 2, EC 3.1.3.-	NT5DC2	1.91027	0.424224	2.04603	1.10294	1.74613	1.18131	0.728174	1			MitoCarta 3.0
Q16795	NDUA9_HUMAN	NADH dehydrogenase [ubiquinone] 1 alpha subcomplex subunit 9, mitochondrial (Complex I-39kD, CI-39kD) (NADH-ubiquinone oxidoreductase 39 kDa subunit)	NDUFA9 NDUFS2L	1.28963	0.899474	1.56813	1.06605	0.942811	1.3095	0.248749	1			GOCC, MitoCarta 3.0
Q9UFN0	NPS3A_HUMAN	Protein NipSnap homolog 3A, NipSnap3A (Protein NipSnap homolog 4, NipSnap4) (Target for Salmonella secreted protein C, TassC)	NIPSNAP3A NIPSNAP4 HSPC299	1.28074	0.408709	1.32633	1.24454	1.06177	1.18149	0.371574	1			GOCC, MitoCarta 3.0
Q7L592	NDUF7_HUMAN	Protein arginine methyltransferase NDUFAF7, mitochondrial, EC 2.1.1.320 (NADH dehydrogenase [ubiquinone] complex I, assembly factor 7) (Protein midA homolog)	NDUFAF7 C2orf56 PRO1853	2.18861	0.685206	1.41493	1.2904	1.2182	1.45611	0.687657	1			GOCC, MitoCarta 3.0
Q96GK7	FAH2A_HUMAN	Fumarylacetoacetate hydrolase domain-containing protein 2A, EC 3.-.-.-	FAHD2A CGI-105	1.03876	0.53722	2.03827	1.19654	1.0473	1.09464	0.263658	1			MitoCarta 3.0
O75616	ERAL1_HUMAN	GTPase Era, mitochondrial, H-ERA, hERA (Conserved ERA-like GTPase, CEGA) (ERA-W) (ERA-like protein 1)	ERAL1 HERA	1.72655	0.986978	1.08585	1.21521	1.68672	1.33416	0.850948	1			GOCC, MitoCarta 3.0, PubMed: 20604745
Q16762	THTR_HUMAN	Thiosulfate sulfurtransferase, EC 2.8.1.1 (Rhodanese)	TST	1.36007	-0.0130977	1.56733	1.07792	1.03282	1.19282	0.237719	1			GOCC, MitoCarta 3.0
Q96HY7	DHTK1_HUMAN	2-oxoadipate dehydrogenase complex component E1, E1a, OADC-E1, OADH-E1, EC 1.2.4.- (2-oxoadipate dehydrogenase, mitochondrial) (Alpha-ketoadipate dehydrogenase, Alpha-KADH-E1) (Dehydrogenase E1 and transketolase domain-containing protein 1) (Probable 2-oxoglutarate dehydrogenase E1 component DHKTD1, mitochondrial)	DHTKD1 KIAA1630	1.24927	0.894043	1.30461	1.18201	1.10126	1.13225	0.319924	1			GOCC, MitoCarta 3.0
Q9NX40	OCAD1_HUMAN	OCIA domain-containing protein 1 (Ovarian cancer immunoreactive antigen domain containing 1) (Ovarian carcinoma immunoreactive antigen)	OCIAD1 ASRIJ OCIA	1.01626	0.953813	1.02071	0.998101	0.941702	1.07404	0.0113536	1			MitoCarta 3.0
Q9UQ90	SPG7_HUMAN	Paraplegin, EC 3.4.24.- (Cell matrix adhesion regulator) (Spastic paraplegia 7 protein)	SPG7 CAR CMAR PGN	1.78134	0.957126	1.09889	1.282	1.74454	1.23708	0.866922	1			GOCC, MitoCarta 3.0
Q32P41	TRM5_HUMAN	tRNA (guanine(37)-N1)-methyltransferase, EC 2.1.1.228 (M1G-methyltransferase) (tRNA [GM37] methyltransferase) (tRNA methyltransferase 5 homolog)	TRMT5 KIAA1393 TRM5	1.10368	0.765824	1.25991	0.97857	0.867801	1.15855	0.0040403	1			GOCC, MitoCarta 3.0
Q8N183	NDUF2_HUMAN	NADH dehydrogenase [ubiquinone] 1 alpha subcomplex assembly factor 2 (B17.2-like, B17.2L) (Mimitin) (Myc-induced mitochondrial protein, MMTN) (NDUFA12-like protein)	NDUFAF2 NDUFA12L	2.04178	-0.238008	2.35597	1.23982	1.14628	1.16329	0.414741	1			GOCC, MitoCarta 3.0
Q9UBX3	DIC_HUMAN	Mitochondrial dicarboxylate carrier (Solute carrier family 25 member 10)	SLC25A10 DIC	1.28883	0.933133	1.25895	1.37715	1.16739	1.29851	0.610793	1			GOCC, MitoCarta 3.0
Q00325	MPCP_HUMAN	Phosphate carrier protein, mitochondrial (Phosphate transport protein, PTP) (Solute carrier family 25 member 3)	SLC25A3 PHC OK/SW-cl.48	1.05282	0.637291	1.5985	1.15911	0.911245	1.09349	0.131149	1			GOCC, MitoCarta 3.0
Q969Z0	FAKD4_HUMAN	FAST kinase domain-containing protein 4 (Cell cycle progression restoration protein 2, Cell cycle progression protein 2) (Protein TBRG4) (Transforming growth factor beta regulator 4)	TBRG4 CPR2 FASTKD4 KIAA0948	1.01281	0.897307	1.75936	1.4455	1.31948	1.3184	0.760392	1			GOCC, MitoCarta 3.0
Q16836	HCDH_HUMAN	Hydroxyacyl-coenzyme A dehydrogenase, mitochondrial, HCDH, EC 1.1.1.35 (Medium and short-chain L-3-hydroxyacyl-coenzyme A dehydrogenase) (Short-chain 3-hydroxyacyl-CoA dehydrogenase)	HADH HAD HAD1 HADHSC SCHAD	2.11139	0.992441	1.28945	1.46399	0.957016	1.0803	0.381102	1			GOCC, MitoCarta 3.0
P28288	ABCD3_HUMAN	ATP-binding cassette sub-family D member 3, EC 3.1.2.-, EC 7.6.2.- (70 kDa peroxisomal membrane protein, PMP70)	ABCD3 PMP70 PXMP1	1.7307	0.778466	1.48176	1.10939	1.22162	1.09899	0.330356	1			GOCC, MitoCarta 3.0
Q8TAE8	G45IP_HUMAN	Growth arrest and DNA damage-inducible proteins-interacting protein 1 (39S ribosomal protein L59, mitochondrial, MRP-L59) (CKII beta-associating protein) (CR6-interacting factor 1, CRIF1) (Mitochondrial large ribosomal subunit protein mL64) (Papillomavirus L2-interacting nuclear protein 1, PLINP, PLINP-1) (p53-responsive gene 6 protein)	GADD45GIP1 MRPL59 PLINP1 PRG6	1.52631	0.904651	1.32358	1.1304	1.05274	1.16156	0.268245	1			GOCC, MitoCarta 3.0
Q96QE5	TEFM_HUMAN	Transcription elongation factor, mitochondrial	TEFM C17orf42	1.98362	0.78509	1.42574	1.07109	1.1082	1.22663	0.312981	1			GOCC, MitoCarta 3.0, PubMed: 21278163
Q9GZT8	NIF3L_HUMAN	NIF3-like protein 1 (Amyotrophic lateral sclerosis 2 chromosomal region candidate gene 1 protein)	NIF3L1 ALS2CR1 MDS015 My018	1.16954	0.996451	1.58152	1.02719	1.06444	1.04887	0.112885	1			GOCC, MitoCarta 3.0
Q96LJ7	DHRS1_HUMAN	Dehydrogenase/reductase SDR family member 1, EC 1.1.1.- (Short chain dehydrogenase/reductase family 19C member 1, Protein SDR19C1)	DHRS1 SDR19C1	1.1626	0.626475	1.45103	1.26005	1.11247	1.23921	0.45768	1			MitoCarta 3.0
O75608	LYPA1_HUMAN	Acyl-protein thioesterase 1, APT-1, hAPT1, EC 3.1.2.- (Lysophospholipase 1) (Lysophospholipase I, LPL-I, LysoPLA I) (Palmitoyl-protein hydrolase, EC 3.1.2.22)	LYPLA1 APT1 LPL1	1.16911	0.537488	1.35956	0.957932	1.05892	1.03529	0.0424957	1			MitoCarta 3.0
Q9BSH5	HDHD3_HUMAN	Haloacid dehalogenase-like hydrolase domain-containing protein 3	HDHD3 C9orf158	1.35196		1.68978	1.29514	1.50594	1.36003	0.806905	1			MitoCarta 3.0
P07203	GPX1_HUMAN	Glutathione peroxidase 1, GPx-1, GSHPx-1, EC 1.11.1.9 (Cellular glutathione peroxidase)	GPX1	1.31432	0.362604	1.85411	1.42271	1.29391	1.34533	0.747408	1			GOCC, MitoCarta 3.0
Q8WWC4	MAIP1_HUMAN	m-AAA protease-interacting protein 1, mitochondrial (Matrix AAA peptidase-interacting protein 1)	MAIP1 C2orf47	2.18457		3.79759	1.03745	1.03783	1.34852	0.325896	1			GOCC, MitoCarta 3.0
Q6UB28	MAP12_HUMAN	Methionine aminopeptidase 1D, mitochondrial, MAP 1D, MetAP 1D, EC 3.4.11.18 (Methionyl aminopeptidase type 1D, mitochondrial) (Peptidase M 1D)	METAP1D MAP1D	1.23081	0.746281	1.74955	1.11889	1.38174	1.23375	0.540045	1			GOCC, MitoCarta 3.0
Q9Y2R5	RT17_HUMAN	28S ribosomal protein S17, mitochondrial, MRP-S17, S17mt (Mitochondrial small ribosomal subunit protein uS17m)	MRPS17 RPMS17 HSPC011	1.41709	0.841763	2.01879	0.919509	1.07103	1.22439	0.17065	1			GOCC, MitoCarta 3.0
Q96NB2	SFXN2_HUMAN	Sideroflexin-2	SFXN2	1.01978	-0.531098	1.00444	1.04142	1.12507	1.27316	0.33728	1			GOCC, MitoCarta 3.0
Q9Y676	RT18B_HUMAN	28S ribosomal protein S18b, mitochondrial, MRP-S18-b, Mrps18-b, S18mt-b (28S ribosomal protein S18-2, mitochondrial, MRP-S18-2) (Mitochondrial small ribosomal subunit protein bS18b) (Mitochondrial small ribosomal subunit protein mS40)	MRPS18B C6orf14 HSPC183 PTD017	1.77593	-0.373875	2.8674	1.22129	1.22979	1.06939	0.394562	1			GOCC, MitoCarta 3.0
Q8N465	D2HDH_HUMAN	D-2-hydroxyglutarate dehydrogenase, mitochondrial, EC 1.1.99.39	D2HGDH D2HGD	1.95959	-0.0676651	2.92645	1.33464	1.40368	1.50573	0.855579	1			GOCC, MitoCarta 3.0
O75380	NDUS6_HUMAN	NADH dehydrogenase [ubiquinone] iron-sulfur protein 6, mitochondrial (Complex I-13kD-A, CI-13kD-A) (NADH-ubiquinone oxidoreductase 13 kDa-A subunit)	NDUFS6	1.48688		1.76337	0.900576	0.947487	1.09314	-0.0488142	1			GOCC, MitoCarta 3.0
Q96ER9	MITOK_HUMAN	Mitochondrial potassium channel, MITOK (Coiled-coil domain-containing protein 51)	CCDC51 MITOK	2.08476		2.02972	1.219		1.3156	0.58424	1			GOCC, MitoCarta 3.0
Q9BT30	ALKB7_HUMAN	Alpha-ketoglutarate-dependent dioxygenase alkB homolog 7, mitochondrial, EC 1.14.11.- (Alkylated DNA repair protein alkB homolog 7) (Spermatogenesis cell proliferation-related protein) (Spermatogenesis-associated protein 11)	ALKBH7 ABH7 SPATA11 UNQ6002/PRO34564	1.76746	0.792937	1.61817	0.755232	0.873352	0.889048	-0.432326	1			GOCC, MitoCarta 3.0
Q05932	FOLC_HUMAN	Folylpolyglutamate synthase, mitochondrial, EC 6.3.2.17 (Folylpoly-gamma-glutamate synthetase, FPGS) (Tetrahydrofolylpolyglutamate synthase, Tetrahydrofolate synthase)	FPGS	1.13438		1.12613	1.2933	2.03014	1.83195	1.33533	1			GOCC, MitoCarta 3.0
Q9H3K2	GHITM_HUMAN	Growth hormone-inducible transmembrane protein (Dermal papilla-derived protein 2) (Mitochondrial morphology and cristae structure 1, MICS1) (Transmembrane BAX inhibitor motif-containing protein 5)	GHITM DERP2 MICS1 TMBIM5 My021 UNQ244/PRO281	1.95419	0.909828	1.60653	1.30356	0.974257	1.28019	0.420725	1			GOCC, MitoCarta 3.0, PMID: 18417609
P04179	SODM_HUMAN	Superoxide dismutase [Mn], mitochondrial, EC 1.15.1.1	SOD2	1.21623	0.997942	1.43148	0.926983	0.972448	1.06534	-0.0291362	1			GOCC, MitoCarta 3.0
Q9BU61	NDUF3_HUMAN	NADH dehydrogenase [ubiquinone] 1 alpha subcomplex assembly factor 3	NDUFAF3 C3orf60	1.79671	0.92432	1.20126	1.11619	1.32768	1.22703	0.497765	1			GOCC, MitoCarta 3.0
P82663	RT25_HUMAN	28S ribosomal protein S25, mitochondrial, MRP-S25, S25mt (Mitochondrial small ribosomal subunit protein mS25)	MRPS25 RPMS25	1.27205	0.994068	1.6088	0.974824	0.992109	0.999823	-0.0274825	1			GOCC, MitoCarta 3.0
Q9NVV4	PAPD1_HUMAN	Poly(A) RNA polymerase, mitochondrial, PAP, EC 2.7.7.19 (PAP-associated domain-containing protein 1) (Polynucleotide adenylyltransferase) (Terminal uridylyltransferase 1, TUTase 1) (mtPAP)	MTPAP PAPD1	1.89403	0.810978	1.92138	1.03439	1.45898	1.30171	0.57981	1			GOCC, MitoCarta 3.0
Q8N4T8	CBR4_HUMAN	3-oxoacyl-[acyl-carrier-protein] reductase, EC 1.1.1.100 (3-ketoacyl-[acyl-carrier-protein] reductase beta subunit, KAR beta subunit) (Carbonyl reductase family member 4, CBR4) (Quinone reductase CBR4, EC 1.6.5.10) (Short chain dehydrogenase/reductase family 45C member 1)	CBR4 SDR45C1	1.20438	0.695709	2.24288	1.11298	1.07335	1.10963	0.232045	1			GOCC, MitoCarta 3.0
O14880	MGST3_HUMAN	Microsomal glutathione S-transferase 3, Microsomal GST-3 (Glutathione peroxidase MGST3, EC 1.11.1.-) (LTC4 synthase MGST3, EC 4.4.1.20) (Microsomal glutathione S-transferase III, Microsomal GST-III)	MGST3	1.3153	0.771443	1.44468	1.15976	1.09058	1.09617	0.269585	1			MitoCarta 3.0
Q7Z2W9	RM21_HUMAN	39S ribosomal protein L21, mitochondrial, L21mt, MRP-L21 (Mitochondrial large ribosomal subunit protein bL21m)	MRPL21	1.48911	-1.53672	1.55359	1.02215	1.04298	1.07673	0.113948	1			GOCC, MitoCarta 3.0
Q6PML9	ZNT9_HUMAN	Zinc transporter 9, ZnT-9 (Human embryonic lung protein, HuEL) (Solute carrier family 30 member 9)	SLC30A9 C4orf1 HUEL	1.98158		1.02054	0.981492	1.13377	1.03597	0.121295	1			MitoCarta 3.0
Q15120	PDK3_HUMAN	[Pyruvate dehydrogenase (acetyl-transferring)] kinase isozyme 3, mitochondrial, EC 2.7.11.2 (Pyruvate dehydrogenase kinase isoform 3)	PDK3 PDHK3	1.12084		2.28369	1.10411		1.47654	0.628649	1			GOCC, MitoCarta 3.0
Q13907	IDI1_HUMAN	Isopentenyl-diphosphate Delta-isomerase 1, EC 5.3.3.2 (Isopentenyl pyrophosphate isomerase 1, IPP isomerase 1, IPPI1)	IDI1	1.25535		1.55129	0.920648		0.981252	-0.12404	1			MitoCarta 3.0
P09669	COX6C_HUMAN	Cytochrome c oxidase subunit 6C (Cytochrome c oxidase polypeptide VIc)	COX6C	1.47738		1.38035	1.05539		1.12857	0.217024	1			GOCC, MitoCarta 3.0
P58557	YBEY_HUMAN	Endoribonuclease YbeY, EC 3.1.-.-	YBEY C21orf57	1.66428	0.968446	1.28071	0.836701	0.859031	1.06652	-0.203634	1			MitoCarta 3.0
Q96I59	SYNM_HUMAN	Probable asparagine--tRNA ligase, mitochondrial, EC 6.1.1.22 (Asparaginyl-tRNA synthetase, AsnRS)	NARS2	1.06772		1.30691	1.43922	1.6742	0.947439	0.746754	1			GOCC, MitoCarta 3.0
Q9P0S9	TM14C_HUMAN	Transmembrane protein 14C	TMEM14C C6orf53 HSPC194	2.03291		1.31204	1.36322	1.25247	1.16107	0.567876	1			GOCC, MitoCarta 3.0
Q9NVA1	UQCC1_HUMAN	Ubiquinol-cytochrome-c reductase complex assembly factor 1 (Basic FGF-repressed Zic-binding protein, bFGF-repressed Zic-binding protein, bFZb) (Ubiquinol-cytochrome c reductase complex chaperone CBP3 homolog)	UQCC1 BZFB C20orf44 UQCC	1.54388		2.29609	0.983759	1.10578	1.24661	0.261937	1			GOCC, MitoCarta 3.0
Q9Y6H1	CHCH2_HUMAN	Coiled-coil-helix-coiled-coil-helix domain-containing protein 2 (Aging-associated gene 10 protein) (HCV NS2 trans-regulated protein, NS2TP)	CHCHD2 C7orf17 AAG10	1.87124		1.65891	1.58077	2.02098	1.78089	1.44172	1			GOCC, MitoCarta 3.0
Q9BQC6	RT63_HUMAN	Ribosomal protein 63, mitochondrial, hMRP63 (Mitochondrial large ribosomal subunit protein mL63) (Mitochondrial ribosomal protein 63) (Mitochondrial ribosomal protein L57)	MRPL57 MRP63	1.53424		1.7357	0.81826		1.09857	-0.104752	1			GOCC, MitoCarta 3.0
Q9NXA8	SIR5_HUMAN	NAD-dependent protein deacylase sirtuin-5, mitochondrial, EC 2.3.1.- (Regulatory protein SIR2 homolog 5) (SIR2-like protein 5)	SIRT5 SIR2L5	1.14032		1.04435	1.17408		1.26493	0.489427	1			GOCC, MitoCarta 3.0
Q53S33	BOLA3_HUMAN	BolA-like protein 3	BOLA3	1.02876	0.946946	1.3994	0.868112	1.12942	1.12722	0.100479	1			GOCC, MitoCarta 3.0
Q8N0V3	RBFA_HUMAN	Putative ribosome-binding factor A, mitochondrial	RBFA C18orf22	1.56857	0.680629	1.29678	1.28747	1.20121	1.27401	0.558665	1			GOCC, MitoCarta 3.0
Q9H6K4	OPA3_HUMAN	Optic atrophy 3 protein	OPA3	1.36077		1.51746	1.09171		1.10942	0.236338	1			GOCC, MitoCarta 3.0
Q9NUT2	MITOS_HUMAN	Mitochondrial potassium channel ATP-binding subunit (ATP-binding cassette sub-family B member 8, mitochondrial, ABCB8) (Mitochondrial ATP-binding cassette 1, M-ABC1) (Mitochondrial sulfonylurea-receptor, MITOSUR)	ABCB8 MABC1 MITOSUR	1.53864		1.33294	1.41419		1.18879	0.6499	1			GOCC, MitoCarta 3.0
Q9BVS5	TR61B_HUMAN	tRNA (adenine(58)-N(1))-methyltransferase, mitochondrial, EC 2.1.1.220 (mRNA methyladenosine-N(1)-methyltransferase, EC 2.1.1.-)	TRMT61B	1.61556	0.30057	1.07568	1.28052	0.908485	1.17646	0.283509	1			GOCC, MitoCarta 3.0
Q8WV60	PTCD2_HUMAN	Pentatricopeptide repeat-containing protein 2, mitochondrial	PTCD2	2.42122		2.36084	1.36725	1.05088	1.38266	0.583516	1			GOCC, MitoCarta 3.0
O95721	SNP29_HUMAN	Synaptosomal-associated protein 29, SNAP-29 (Soluble 29 kDa NSF attachment protein) (Vesicle-membrane fusion protein SNAP-29)	SNAP29	1.29956	0.92986	1.13335	0.717084	0.568986	0.781669	-0.917851	1			MitoCarta 3.0
Q9NXF1	TEX10_HUMAN	Testis-expressed protein 10	TEX10 L18 Nbla10363	1.32154	0.820892	1.23909	1.21621	1.04421	1.1479	0.314718	1			GOCC
Q9BRJ2	RM45_HUMAN	39S ribosomal protein L45, mitochondrial, L45mt, MRP-L45 (Mitochondrial large ribosomal subunit protein mL45)	MRPL45	1.56265	0.6485	1.21536	1.25341	1.2664	1.16605	0.507792	1			GOCC
Q96QK1	VPS35_HUMAN	Vacuolar protein sorting-associated protein 35, hVPS35 (Maternal-embryonic 3) (Vesicle protein sorting 35)	VPS35 MEM3 TCCCTA00141	1.45258	0.908156	1.23232	1.18431	1.11143	1.31536	0.457246	1			GOCC
P57729	RAB38_HUMAN	Ras-related protein Rab-38 (Melanoma antigen NY-MEL-1)	RAB38	2.372		1.93481	0.919187		0.955018	-0.160217	1			GOCC
P51572	BAP31_HUMAN	B-cell receptor-associated protein 31, BCR-associated protein 31, Bap31 (6C6-AG tumor-associated antigen) (Protein CDM) (p28)	BCAP31 BAP31 DXS1357E	1.25107	0.270915	1.30587	1.26343	0.938726	1.05952	0.206254	1			GOCC
O43292	GPAA1_HUMAN	Glycosylphosphatidylinositol anchor attachment 1 protein, GPI anchor attachment protein 1 (GAA1 protein homolog, hGAA1)	GPAA1 GAA1	1.72409	0.398436	1.15656	1.29558	0.8584	1.20472	0.278554	1			GOCC
Q92542	NICA_HUMAN	Nicastrin	NCSTN KIAA0253 UNQ1874/PRO4317	1.37914		1.3851	1.35799	1.04333	1.47737	0.633555	1			GOCC
P0DPI2	GAL3A_HUMAN	Glutamine amidotransferase-like class 1 domain-containing protein 3, mitochondrial	GATD3 C21orf33 GATD3A	1.76537	0.638858	1.64481	1.15912	1.21309	0.959756	0.25884	1			GOCC
Q15165	PON2_HUMAN	Serum paraoxonase/arylesterase 2, PON 2, EC 3.1.1.2, EC 3.1.1.81 (Aromatic esterase 2, A-esterase 2) (Serum aryldialkylphosphatase 2)	PON2	1.0262		1.35576	1.03092	0.320219	0.404601	-1.32126	1			GOCC
P48735	IDHP_HUMAN	Isocitrate dehydrogenase [NADP], mitochondrial, IDH, EC 1.1.1.42 (ICD-M) (IDP) (NADP(+)-specific ICDH) (Oxalosuccinate decarboxylase)	IDH2	0.818036	1.04374	1.2837	1.13149	1.41617	1.24401	0.577592	1			GOCC, MitoCarta 3.0
Q96TA2	YMEL1_HUMAN	ATP-dependent zinc metalloprotease YME1L1, EC 3.4.24.- (ATP-dependent metalloprotease FtsH1) (Meg-4) (Presenilin-associated metalloprotease, PAMP) (YME1-like protein 1)	YME1L1 FTSH1 YME1L UNQ1868/PRO4304	0.729326	1.24052	1.14415	1.00749	1.04647	1.09588	0.120205	1			GOCC, MitoCarta 3.0
P24752	THIL_HUMAN	Acetyl-CoA acetyltransferase, mitochondrial, EC 2.3.1.9 (Acetoacetyl-CoA thiolase) (T2)	ACAT1 ACAT MAT	0.80671	2.08734	1.45159	1.12038	1.4447	1.22458	0.57629	1			GOCC, MitoCarta 3.0
P10515	ODP2_HUMAN	Dihydrolipoyllysine-residue acetyltransferase component of pyruvate dehydrogenase complex, mitochondrial, EC 2.3.1.12 (70 kDa mitochondrial autoantigen of primary biliary cirrhosis, PBC) (Dihydrolipoamide acetyltransferase component of pyruvate dehydrogenase complex) (M2 antigen complex 70 kDa subunit) (Pyruvate dehydrogenase complex component E2, PDC-E2, PDCE2)	DLAT DLTA	0.648821	1.14363	1.51253	1.00751	1.06471	1.02506	0.0787058	1			GOCC, MitoCarta 3.0
P12235	ADT1_HUMAN	ADP/ATP translocase 1 (ADP,ATP carrier protein 1) (ADP,ATP carrier protein, heart/skeletal muscle isoform T1) (Adenine nucleotide translocator 1, ANT 1) (Solute carrier family 25 member 4)	SLC25A4 AAC1 ANT1		1.2914	1.93889		0.782836	1.21729	0.000151365	1			GOCC, MitoCarta 3.0
Q96AY3	FKB10_HUMAN	Peptidyl-prolyl cis-trans isomerase FKBP10, PPIase FKBP10, EC 5.2.1.8 (65 kDa FK506-binding protein, 65 kDa FKBP, FKBP-65) (FK506-binding protein 10, FKBP-10) (Immunophilin FKBP65) (Rotamase)	FKBP10 FKBP65 PSEC0056	0.548383	1.21255	1.31738	0.897052	0.901376	0.894592	-0.266235	1			GOCC, MitoCarta 3.0
P53007	TXTP_HUMAN	Tricarboxylate transport protein, mitochondrial (Citrate transport protein, CTP) (Solute carrier family 25 member 1) (Tricarboxylate carrier protein)	SLC25A1 SLC20A3	0.883219	1.84445	2.07199	1.24143	1.20653	1.15501	0.451697	1			GOCC, MitoCarta 3.0
Q9NVH1	DJC11_HUMAN	DnaJ homolog subfamily C member 11	DNAJC11	0.48929	1.09968	1.24692	1.16489	1.09133	1.17848	0.333741	1			GOCC, MitoCarta 3.0
Q96CU9	FXRD1_HUMAN	FAD-dependent oxidoreductase domain-containing protein 1, EC 1.-.-.-	FOXRED1 FP634		1.25102	1.26006	1.23071	1.41987	1.35331	0.71191	1			GOCC, MitoCarta 3.0
Q9NWU5	RM22_HUMAN	39S ribosomal protein L22, mitochondrial, L22mt, MRP-L22 (39S ribosomal protein L25, mitochondrial, L25mt, MRP-L25) (Mitochondrial large ribosomal subunit protein uL22m)	MRPL22 MRPL25 RPML25 HSPC158	0.775499	1.08667	1.5451	1.0874	1.34242	1.23377	0.492845	1			GOCC, MitoCarta 3.0
Q9NRX2	RM17_HUMAN	39S ribosomal protein L17, mitochondrial, L17mt, MRP-L17 (LYST-interacting protein 2) (Mitochondrial large ribosomal subunit protein bL17m)	MRPL17 LIP2	0.958567	1.70014	2.15985	1.17766	1.05581	1.30429	0.406641	1			GOCC, MitoCarta 3.0
P53597	SUCA_HUMAN	Succinate--CoA ligase [ADP/GDP-forming] subunit alpha, mitochondrial, EC 6.2.1.4, EC 6.2.1.5 (Succinyl-CoA synthetase subunit alpha, SCS-alpha)	SUCLG1	0.538095	2.46988	1.03192	1.09109	1.45245	0.944606	0.371817	1			GOCC, MitoCarta 3.0
P52815	RM12_HUMAN	39S ribosomal protein L12, mitochondrial, L12mt, MRP-L12 (5c5-2) (Mitochondrial large ribosomal subunit protein bL12m)	MRPL12 MRPL7 RPML12	0.129784	1.41762	1.52639	0.97454	0.92405	0.953706	-0.124518	1			GOCC, MitoCarta 3.0
Q9NQZ5	STAR7_HUMAN	StAR-related lipid transfer protein 7, mitochondrial (Gestational trophoblastic tumor protein 1) (START domain-containing protein 7, StARD7)	STARD7 GTT1	-0.423133	1.44144	1.27672	0.836203	0.841337	1.14862	-0.147221	1			GOCC, MitoCarta 3.0
O75323	NIPS2_HUMAN	Protein NipSnap homolog 2, NipSnap2 (Glioblastoma-amplified sequence)	NIPSNAP2 GBAS	0.990571	2.85999	1.96582	1.0165	1.23257	1.26361	0.389103	1			GOCC, MitoCarta 3.0
Q53R41	FAKD1_HUMAN	FAST kinase domain-containing protein 1, mitochondrial	FASTKD1 KIAA1800	0.660696	1.13928	1.10495	1.11991	1.38255	1.014	0.39175	1			GOCC, MitoCarta 3.0, PubMed: 20869947
O00746	NDKM_HUMAN	Nucleoside diphosphate kinase, mitochondrial, NDK, NDP kinase, mitochondrial, EC 2.7.4.6 (Nucleoside diphosphate kinase D, NDPKD) (nm23-H4)	NME4 NM23D		1.11862	1.84071	1.0211	0.889718	1.30967	0.174913	1			GOCC, MitoCarta 3.0
Q92947	GCDH_HUMAN	Glutaryl-CoA dehydrogenase, mitochondrial, GCD, EC 1.3.8.6	GCDH	0.895388	2.63183	1.56116	1.30349	1.72544	1.08005	0.775806	1			GOCC, MitoCarta 3.0
Q9H0U6	RM18_HUMAN	39S ribosomal protein L18, mitochondrial, L18mt, MRP-L18 (Mitochondrial large ribosomal subunit protein uL18m)	MRPL18 HSPC071	0.487258	1.67369	1.77703	0.914591	1.24387	1.37513	0.403739	1			GOCC, MitoCarta 3.0
Q8NE86	MCU_HUMAN	Calcium uniporter protein, mitochondrial, HsMCU (Coiled-coil domain-containing protein 109A)	MCU C10orf42 CCDC109A		2.50219	1.65944	1.2255	0.967325	1.24831	0.338345	1			GOCC, MitoCarta 3.0
Q8TB37	NUBPL_HUMAN	Iron-sulfur protein NUBPL (IND1 homolog) (Nucleotide-binding protein-like) (huInd1)	NUBPL C14orf127	0.625757	1.20224	1.10374	1.07582	1.27328	1.00966	0.278596	1			GOCC, MitoCarta 3.0
Q330K2	NDUF6_HUMAN	NADH dehydrogenase (ubiquinone) complex I, assembly factor 6 (Putative phytoene synthase)	NDUFAF6 C8orf38	0.520557	1.39579	1.37375	1.02943	1.0753	1.2451	0.272023	1			GOCC, MitoCarta 3.0
Q8N2F6	ARM10_HUMAN	Armadillo repeat-containing protein 10 (Splicing variant involved in hepatocarcinogenesis protein)	ARMC10 SVH PSEC0198	0.0170242	1.05467	1.10336	1.01615	1.0814	0.981107	0.0638296	1			GOCC, MitoCarta 3.0
Q8N5M1	ATPF2_HUMAN	ATP synthase mitochondrial F1 complex assembly factor 2 (ATP12 homolog)	ATPAF2 ATP12 LP3663		2.09209	1.7233	1.23005	0.96881	1.20302	0.310055	1			GOCC, MitoCarta 3.0
O95140	MFN2_HUMAN	Mitofusin-2, EC 3.6.5.- (Transmembrane GTPase MFN2)	MFN2 CPRP1 KIAA0214	0.793531	1.10912	1.01709	0.971398	1.03072	0.893012	-0.0877562	1			GOCC, MitoCarta 3.0
Q6P161	RM54_HUMAN	39S ribosomal protein L54, mitochondrial, L54mt, MRP-L54 (Mitochondrial large ribosomal subunit protein mL54)	MRPL54	0.652052	1.3173	1.48668	1.00079	1.21751	0.900425	0.0957286	1			GOCC, MitoCarta 3.0
Q8TBP6	S2540_HUMAN	Probable mitochondrial glutathione transporter SLC25A40 (Mitochondrial carrier family protein) (Solute carrier family 25 member 40)	SLC25A40 MCFP		1.10783	1.04657	1.19975	0.995424	1.28739	0.367867	1			GOCC, MitoCarta 3.0
Q9UG56	PISD_HUMAN	Phosphatidylserine decarboxylase proenzyme, mitochondrial, EC 4.1.1.65 [Cleaved into: Phosphatidylserine decarboxylase beta chain; Phosphatidylserine decarboxylase alpha chain ]	PISD	0.950274	2.08152	1.18396	0.974742	1.44391	1.15085	0.428674	1			GOCC, MitoCarta 3.0
O60783	RT14_HUMAN	28S ribosomal protein S14, mitochondrial, MRP-S14, S14mt (Mitochondrial small ribosomal subunit protein uS14m)	MRPS14	0.468488	2.15446	1.22657	0.769172	3.32715	2.42449	1.9148	1			GOCC, MitoCarta 3.0
O95139	NDUB6_HUMAN	NADH dehydrogenase [ubiquinone] 1 beta subcomplex subunit 6 (Complex I-B17, CI-B17) (NADH-ubiquinone oxidoreductase B17 subunit)	NDUFB6	0.558004	1.51085	1.03557	0.970994	0.931633	1.04544	-0.043065	1			GOCC, MitoCarta 3.0
Q8NFF5	FAD1_HUMAN	FAD synthase, EC 2.7.7.2 (FAD pyrophosphorylase) (FMN adenylyltransferase) (Flavin adenine dinucleotide synthase) [Includes: Molybdenum cofactor biosynthesis protein-like region; FAD synthase region ]	FLAD1 PP591	-0.342528	1.25153	1.53333	1.02418	1.15482	1.01003	0.150692	1			GOCC, MitoCarta 3.0
Q96EL3	RM53_HUMAN	39S ribosomal protein L53, mitochondrial, L53mt, MRP-L53 (Mitochondrial large ribosomal subunit protein mL53)	MRPL53	0.56549	1.63663	1.44854	1.54003	1.10535	1.29257	0.670957	1			GOCC, MitoCarta 3.0
Q02338	BDH_HUMAN	D-beta-hydroxybutyrate dehydrogenase, mitochondrial, EC 1.1.1.30 (3-hydroxybutyrate dehydrogenase, BDH) (Short chain dehydrogenase/reductase family 9C member 1)	BDH1 BDH SDR9C1	0.868036	1.14704	1.2134	0.9478	1.27087	1.16789	0.298928	1			GOCC, MitoCarta 3.0
Q7Z7F7	RM55_HUMAN	39S ribosomal protein L55, mitochondrial, L55mt, MRP-L55 (Mitochondrial large ribosomal subunit protein bL31m) (Mitochondrial large ribosomal subunit protein mL55)	MRPL55 UNQ5835/PRO19675		1.15874	2.32415	1.13988	1.22663	1.42369	0.57664	1			GOCC, MitoCarta 3.0
Q9UNQ2	DIM1_HUMAN	Probable dimethyladenosine transferase, EC 2.1.1.183 (DIM1 dimethyladenosine transferase 1 homolog) (DIM1 dimethyladenosine transferase 1-like) (Probable 18S rRNA (adenine(1779)-N(6)/adenine(1780)-N(6))-dimethyltransferase) (Probable 18S rRNA dimethylase) (Probable S-adenosylmethionine-6-N',N'-adenosyl(rRNA) dimethyltransferase)	DIMT1 DIMT1L HUSSY-05	0.928697	1.45305	1.44362	1.10191	1.07009	1.01665	0.150408	1			GOCC
Q96EK5	KBP_HUMAN	KIF-binding protein (KIF1-binding protein) (Kinesin family binding protein)	KIFBP KBP KIAA1279 KIF1BP	0.581385	1.00983	1.4268	1.00169	1.24418	1.40521	0.484411	1			GOCC
P15848	ARSB_HUMAN	Arylsulfatase B, ASB, EC 3.1.6.12 (N-acetylgalactosamine-4-sulfatase, G4S)	ARSB	0.842379	1.28238	1.70242	1.33716	1.08857	1.20043	0.467511	1			GOCC
P42345	MTOR_HUMAN	Serine/threonine-protein kinase mTOR, EC 2.7.11.1 (FK506-binding protein 12-rapamycin complex-associated protein 1) (FKBP12-rapamycin complex-associated protein) (Mammalian target of rapamycin, mTOR) (Mechanistic target of rapamycin) (Rapamycin and FKBP12 target 1) (Rapamycin target protein 1)	MTOR FRAP FRAP1 FRAP2 RAFT1 RAPT1	0.592627	1.58022	1.12265	1.06672	1.34205	1.14472	0.417593	1			GOCC
O43707	ACTN4_HUMAN	Alpha-actinin-4 (Non-muscle alpha-actinin 4)	ACTN4	1.57449	1.21645	1.35583	1.18168	1.30943	1.13846	0.469837		1
P12814	ACTN1_HUMAN	Alpha-actinin-1 (Alpha-actinin cytoskeletal isoform) (F-actin cross-linking protein) (Non-muscle alpha-actinin-1)	ACTN1	1.42868	1.19933	1.25048	1.15188	1.18089	1.11333	0.341906		1
Q9NYU2	UGGG1_HUMAN	UDP-glucose:glycoprotein glucosyltransferase 1, UGT1, hUGT1, EC 2.4.1.- (UDP--Glc:glycoprotein glucosyltransferase) (UDP-glucose ceramide glucosyltransferase-like 1)	UGGT1 GT UGCGL1 UGGT UGT1 UGTR	1.25482	1.29105	1.40846	1.15589	1.14191	1.04957	0.270214		1
P05783	K1C18_HUMAN	Keratin, type I cytoskeletal 18 (Cell proliferation-inducing gene 46 protein) (Cytokeratin-18, CK-18) (Keratin-18, K18)	KRT18 CYK18 PIG46	2.07277	1.53139	1.62952	1.18679	0.976637	1.10522	0.211518		1
P29317	EPHA2_HUMAN	Ephrin type-A receptor 2, EC 2.7.10.1 (Epithelial cell kinase) (Tyrosine-protein kinase receptor ECK)	EPHA2 ECK	1.35632	1.0858	1.61192	1.28565	1.17465	1.11457	0.43239		1
Q13308	PTK7_HUMAN	Inactive tyrosine-protein kinase 7 (Colon carcinoma kinase 4, CCK-4) (Protein-tyrosine kinase 7) (Pseudo tyrosine kinase receptor 7) (Tyrosine-protein kinase-like 7)	PTK7 CCK4	1.29004	1.36581	1.16421	1.25256	1.26611	1.17569	0.513471		1
Q86TX2	ACOT1_HUMAN	Acyl-coenzyme A thioesterase 1, Acyl-CoA thioesterase 1, EC 3.1.2.- (CTE-I) (CTE-Ib) (Inducible cytosolic acyl-coenzyme A thioester hydrolase) (Long chain acyl-CoA thioester hydrolase, Long chain acyl-CoA hydrolase) (Palmitoyl-coenzyme A thioesterase, EC 3.1.2.2)	ACOT1 CTE1	1.64973	1.84404	1.30212	1.13213	1.23803	1.2412	0.457432		1
P04843	RPN1_HUMAN	Dolichyl-diphosphooligosaccharide--protein glycosyltransferase subunit 1 (Dolichyl-diphosphooligosaccharide--protein glycosyltransferase 67 kDa subunit) (Ribophorin I, RPN-I) (Ribophorin-1)	RPN1	1.99163	1.89845	1.48367	1.11441	1.00793	1.19214	0.245864		1
P05121	PAI1_HUMAN	Plasminogen activator inhibitor 1, PAI, PAI-1 (Endothelial plasminogen activator inhibitor) (Serpin E1)	SERPINE1 PAI1 PLANH1	2.35797	1.75457	1.93835	1.17037	1.03053	1.02652	0.180211		1
Q13619	CUL4A_HUMAN	Cullin-4A, CUL-4A	CUL4A	1.28321	1.06813	1.26965	0.956416	1.06327	1.1648	0.147185		1
P26006	ITA3_HUMAN	Integrin alpha-3 (CD49 antigen-like family member C) (FRP-2) (Galactoprotein B3, GAPB3) (VLA-3 subunit alpha) (CD antigen CD49c) [Cleaved into: Integrin alpha-3 heavy chain; Integrin alpha-3 light chain ]	ITGA3 MSK18	1.15148	1.13945	1.28778	1.41135	1.56791	1.29048	0.870461		1
Q6DD88	ATLA3_HUMAN	Atlastin-3, EC 3.6.5.-	ATL3	1.12067	1.07638	1.48536	1.11098	0.93873	0.964175	0.0113888		1
Q13740	CD166_HUMAN	CD166 antigen (Activated leukocyte cell adhesion molecule) (CD antigen CD166)	ALCAM MEMD	1.23518	1.49334	1.15366	1.26655	1.21258	1.11915	0.448487		1
O00622	CCN1_HUMAN	CCN family member 1 (Cellular communication network factor 1) (Cysteine-rich angiogenic inducer 61) (Insulin-like growth factor-binding protein 10, IBP-10, IGF-binding protein 10, IGFBP-10) (Protein CYR61) (Protein GIG1)	CCN1 CYR61 GIG1 IGFBP10	1.4878	1.63757	1.2307	1.34425	1.42395	1.38801	0.803998		1
Q96GD4	AURKB_HUMAN	Aurora kinase B, EC 2.7.11.1 (Aurora 1) (Aurora- and IPL1-like midbody-associated protein 1, AIM-1) (Aurora/IPL1-related kinase 2, ARK-2, Aurora-related kinase 2) (STK-1) (Serine/threonine-protein kinase 12) (Serine/threonine-protein kinase 5) (Serine/threonine-protein kinase aurora-B)	AURKB AIK2 AIM1 AIRK2 ARK2 STK1 STK12 STK5	1.1991	1.27889	1.08103	1.10523	1.14566	1.07544	0.254666		1
O94874	UFL1_HUMAN	E3 UFM1-protein ligase 1, EC 2.3.2.- (E3 UFM1-protein transferase 1) (Multiple alpha-helix protein located at ER) (Novel LZAP-binding protein) (Regulator of C53/LZAP and DDRGK1)	UFL1 KIAA0776 MAXER NLBP RCAD	1.53747	1.74297	1.158	1.14129	1.20174	1.08018	0.325467		1
P19784	CSK22_HUMAN	Casein kinase II subunit alpha', CK II alpha', EC 2.7.11.1	CSNK2A2 CK2A2	1.1669	1.30391	1.12272	1.03842	0.920767	0.944927	-0.0801109		1
Q69YQ0	CYTSA_HUMAN	Cytospin-A (Renal carcinoma antigen NY-REN-22) (Sperm antigen with calponin homology and coiled-coil domains 1-like, SPECC1-like protein)	SPECC1L CYTSA KIAA0376	1.19205	1.04092	1.28827	0.965281	1.25093	1.06851	0.223618		1
Q969V3	NCLN_HUMAN	Nicalin (Nicastrin-like protein)	NCLN	1.35507	1.69994	1.53769	1.00541	0.781854	0.910386	-0.262003		1
Q9BVI4	NOC4L_HUMAN	Nucleolar complex protein 4 homolog, NOC4 protein homolog (NOC4-like protein) (Nucleolar complex-associated protein 4-like protein)	NOC4L	1.12829	1.16777	1.53167	1.26298	1.22146	1.08936	0.431652		1
Q8NBJ5	GT251_HUMAN	Procollagen galactosyltransferase 1, EC 2.4.1.50 (Collagen beta(1-O)galactosyltransferase 1, ColGalT 1) (Glycosyltransferase 25 family member 1) (Hydroxylysine galactosyltransferase 1)	COLGALT1 GLT25D1 PSEC0241	1.5501	1.1917	1.64595	1.15405	0.917707	1.0716	0.115131		1
O75934	SPF27_HUMAN	Pre-mRNA-splicing factor SPF27 (Breast carcinoma-amplified sequence 2) (DNA amplified in mammary carcinoma 1 protein) (Spliceosome-associated protein SPF 27)	BCAS2 DAM1	1.81923	1.03576	1.49017	1.0349	1.04356	1.02084	0.0803064		1
P49257	LMAN1_HUMAN	Protein ERGIC-53 (ER-Golgi intermediate compartment 53 kDa protein) (Gp58) (Intracellular mannose-specific lectin MR60) (Lectin mannose-binding 1)	LMAN1 ERGIC53 F5F8D	1.70021	1.78661	1.52601	1.13351	1.02841	0.960917	0.0989704		1
Q9NZ08	ERAP1_HUMAN	Endoplasmic reticulum aminopeptidase 1, EC 3.4.11.- (ARTS-1) (Adipocyte-derived leucine aminopeptidase, A-LAP) (Aminopeptidase PILS) (Puromycin-insensitive leucyl-specific aminopeptidase, PILS-AP) (Type 1 tumor necrosis factor receptor shedding aminopeptidase regulator)	ERAP1 APPILS ARTS1 KIAA0525 UNQ584/PRO1154	1.77932	1.35619	1.34164	1.35458	0.929139	1.07139	0.27591		1
Q9UNM6	PSD13_HUMAN	26S proteasome non-ATPase regulatory subunit 13 (26S proteasome regulatory subunit RPN9) (26S proteasome regulatory subunit S11) (26S proteasome regulatory subunit p40.5)	PSMD13	2.16845	1.5996	1.40281	1.12014	0.840092	0.96953	-0.0584328		1
P04844	RPN2_HUMAN	Dolichyl-diphosphooligosaccharide--protein glycosyltransferase subunit 2 (Dolichyl-diphosphooligosaccharide--protein glycosyltransferase 63 kDa subunit) (RIBIIR) (Ribophorin II, RPN-II) (Ribophorin-2)	RPN2	1.31586	1.4804	1.29269	1.212	0.846474	1.2225	0.220809		1
Q9H488	OFUT1_HUMAN	GDP-fucose protein O-fucosyltransferase 1, EC 2.4.1.221 (Peptide-O-fucosyltransferase 1, O-FucT-1)	POFUT1 FUT12 KIAA0180	1.391	1.63174	1.21031	0.996556	0.910538	0.917095	-0.148943		1
O75955	FLOT1_HUMAN	Flotillin-1	FLOT1	1.28153	1.33159	1.11354	1.25107	0.946846	1.00031	0.157807		1
P07602	SAP_HUMAN	Prosaposin (Proactivator polypeptide) [Cleaved into: Saposin-A (Protein A); Saposin-B-Val; Saposin-B (Cerebroside sulfate activator, CSAct) (Dispersin) (Sphingolipid activator protein 1, SAP-1) (Sulfatide/GM1 activator); Saposin-C (A1 activator) (Co-beta-glucosidase) (Glucosylceramidase activator) (Sphingolipid activator protein 2, SAP-2); Saposin-D (Component C) (Protein C) ]	PSAP GLBA SAP1	1.17599	2.16545	1.31509	1.66566	1.38196	1.63447	1.09783		1
Q96HE7	ERO1A_HUMAN	ERO1-like protein alpha, ERO1-L, ERO1-L-alpha, EC 1.8.4.- (Endoplasmic oxidoreductin-1-like protein) (Endoplasmic reticulum oxidoreductase alpha) (Oxidoreductin-1-L-alpha)	ERO1A ERO1L UNQ434/PRO865	1.66786	1.3398	1.18302	1.14553	1.01184	1.01124	0.134855		1
Q9BWS9	CHID1_HUMAN	Chitinase domain-containing protein 1 (Stabilin-1-interacting chitinase-like protein, SI-CLP)	CHID1 GL008 PSEC0104 SB139	1.81959	1.49516	1.04405	1.16437	0.886119	0.998807	0.0402005		1
Q9Y2B0	CNPY2_HUMAN	Protein canopy homolog 2 (MIR-interacting saposin-like protein) (Putative secreted protein Zsig9) (Transmembrane protein 4)	CNPY2 MSAP TMEM4 ZSIG9 UNQ1943/PRO4426	1.60095	1.73595	1.97363	0.926366	0.842367	1.10687	-0.104452		1
O43854	EDIL3_HUMAN	EGF-like repeat and discoidin I-like domain-containing protein 3 (Developmentally-regulated endothelial cell locus 1 protein) (Integrin-binding protein DEL1)	EDIL3 DEL1	1.26523	1.66733	1.23373	1.46803	1.66947	1.38817	1.01403		1
Q12907	LMAN2_HUMAN	Vesicular integral-membrane protein VIP36 (Glycoprotein GP36b) (Lectin mannose-binding 2) (Vesicular integral-membrane protein 36, VIP36)	LMAN2 C5orf8	1.59933	1.12048	1.21115	1.09478	0.994924	0.942441	0.0262845		1
Q13724	MOGS_HUMAN	Mannosyl-oligosaccharide glucosidase, EC 3.2.1.106 (Processing A-glucosidase I)	MOGS GCS1	1.75177	1.10793	1.14674	1.22058	1.08383	1.04619	0.272596		1
Q9BRR6	ADPGK_HUMAN	ADP-dependent glucokinase, ADP-GK, ADPGK, EC 2.7.1.147 (RbBP-35)	ADPGK PSEC0260	2.02143	1.23753	2.34115	1.03978	0.927846	1.10933	0.0624693		1
Q15392	DHC24_HUMAN	Delta(24)-sterol reductase, EC 1.3.1.72 (24-dehydrocholesterol reductase) (3-beta-hydroxysterol Delta-24-reductase) (Diminuto/dwarf1 homolog) (Seladin-1)	DHCR24 KIAA0018	1.55109	1.6223	1.93332	1.13477	0.967094	1.11197	0.169809		1
P35250	RFC2_HUMAN	Replication factor C subunit 2 (Activator 1 40 kDa subunit, A1 40 kDa subunit) (Activator 1 subunit 2) (Replication factor C 40 kDa subunit, RF-C 40 kDa subunit, RFC40)	RFC2	1.10078	1.14451	1.59894	1.14294	1.04087	1.17802	0.280839		1
P37837	TALDO_HUMAN	Transaldolase, EC 2.2.1.2	TALDO1 TAL TALDO TALDOR	1.15383	1.09241	1.33103	1.04348	0.749202	1.10579	-0.0849149		1
P51148	RAB5C_HUMAN	Ras-related protein Rab-5C, EC 3.6.5.2 (L1880) (RAB5L)	RAB5C RABL	1.82504	1.84674	1.86162	1.12353	1.00863	1.17478	0.240249		1
P37235	HPCL1_HUMAN	Hippocalcin-like protein 1 (Calcium-binding protein BDR-1) (HLP2) (Visinin-like protein 3, VILIP-3)	HPCAL1 BDR1	1.39226	1.35329	1.02159	1.10187	1.16901	1.16152	0.332074		1
Q86SF2	GALT7_HUMAN	N-acetylgalactosaminyltransferase 7, EC 2.4.1.41 (Polypeptide GalNAc transferase 7, GalNAc-T7, pp-GaNTase 7) (Protein-UDP acetylgalactosaminyltransferase 7) (UDP-GalNAc:polypeptide N-acetylgalactosaminyltransferase 7)	GALNT7	1.58241	1.53774	1.19794	1.12962	0.926497	1.07944	0.109		1
O75844	FACE1_HUMAN	CAAX prenyl protease 1 homolog, EC 3.4.24.84 (Farnesylated proteins-converting enzyme 1, FACE-1) (Prenyl protein-specific endoprotease 1) (Zinc metalloproteinase Ste24 homolog)	ZMPSTE24 FACE1 STE24	1.52612	1.6615	1.2086	1.47267	1.0135	1.43331	0.65936		1
P62277	RS13_HUMAN	40S ribosomal protein S13 (Small ribosomal subunit protein uS15)	RPS13	1.15181	1.24815	1.72721	0.681871	0.832524	0.963866	-0.4712		1
Q6P179	ERAP2_HUMAN	Endoplasmic reticulum aminopeptidase 2, EC 3.4.11.- (Leukocyte-derived arginine aminopeptidase, L-RAP)	ERAP2 LRAP	2.36871	2.35765	1.90365	1.27047	0.877847	1.03885	0.149267		1
O00461	GOLI4_HUMAN	Golgi integral membrane protein 4 (Golgi integral membrane protein, cis, GIMPc) (Golgi phosphoprotein 4) (Golgi-localized phosphoprotein of 130 kDa, Golgi phosphoprotein of 130 kDa)	GOLIM4 GIMPC GOLPH4 GPP130	1.51242	1.68315	1.26754	1.05397	0.746906	1.00907	-0.161412		1
Q969X5	ERGI1_HUMAN	Endoplasmic reticulum-Golgi intermediate compartment protein 1 (ER-Golgi intermediate compartment 32 kDa protein, ERGIC-32)	ERGIC1 ERGIC32 KIAA1181 HT034	1.41549	1.32899	2.13276	1.12718	0.920949	1.03719	0.0691685		1
P48449	LSS_HUMAN	Lanosterol synthase, EC 5.4.99.7 (2,3-epoxysqualene--lanosterol cyclase) (Oxidosqualene--lanosterol cyclase, OSC, hOSC)	LSS OSC	1.09845	1.12932	1.00221	1.11632	1.0657	1.0855	0.210678		1
O43929	ORC4_HUMAN	Origin recognition complex subunit 4	ORC4 ORC4L	1.38021	1.31387	1.59352	1.16272	0.935077	0.941525	0.0321133		1
Q8TCJ2	STT3B_HUMAN	Dolichyl-diphosphooligosaccharide--protein glycosyltransferase subunit STT3B, Oligosaccharyl transferase subunit STT3B, STT3-B, EC 2.4.99.18 (Source of immunodominant MHC-associated peptides homolog)	STT3B SIMP	1.65239	1.66779	1.57709	1.21137	1.0324	1.2648	0.386219		1
Q9UL26	RB22A_HUMAN	Ras-related protein Rab-22A, Rab-22	RAB22A RAB22	1.74494	1.07621	1.31583	1.16515	1.06883	1.13301	0.284634		1
P42785	PCP_HUMAN	Lysosomal Pro-X carboxypeptidase, EC 3.4.16.2 (Angiotensinase C) (Lysosomal carboxypeptidase C) (Proline carboxypeptidase) (Prolylcarboxypeptidase, PRCP)	PRCP PCP	2.28824	1.25166	1.31266	1.6586	1.12781	1.03048	0.593942		1
Q96DM3	RMC1_HUMAN	Regulator of MON1-CCZ1 complex (Colon cancer-associated protein Mic1, Mic-1) (WD repeat-containing protein 98)	RMC1 C18orf8 MIC1 WDR98	1.75017	1.39958	1.70463	1.07917	1.12631	1.01879	0.177808		1
O00487	PSDE_HUMAN	26S proteasome non-ATPase regulatory subunit 14, EC 3.4.19.- (26S proteasome regulatory subunit RPN11) (26S proteasome-associated PAD1 homolog 1)	PSMD14 POH1	1.21411	1.61839	1.33951	0.943549	0.993325	1.05706	-0.00499095		1
P20339	RAB5A_HUMAN	Ras-related protein Rab-5A, EC 3.6.5.2	RAB5A RAB5	1.24639	1.71701	1.28074	1.12822	1.09451	1.31784	0.408601		1
Q15006	EMC2_HUMAN	ER membrane protein complex subunit 2 (Tetratricopeptide repeat protein 35, TPR repeat protein 35)	EMC2 KIAA0103 TTC35	2.30184	2.23808	2.58665	1.28335	0.94973	0.957765	0.152109		1
P61020	RAB5B_HUMAN	Ras-related protein Rab-5B, EC 3.6.5.2	RAB5B	1.59436	1.46308	1.73338	1.15101	1.07481	1.2076	0.332816		1
Q9UL25	RAB21_HUMAN	Ras-related protein Rab-21	RAB21 KIAA0118	1.66608	1.25174	1.1095	1.18278	1.00977	1.29003	0.367884		1
Q9P035	HACD3_HUMAN	Very-long-chain (3R)-3-hydroxyacyl-CoA dehydratase 3, EC 4.2.1.134 (3-hydroxyacyl-CoA dehydratase 3, HACD3) (Butyrate-induced protein 1, B-ind1, hB-ind1) (Protein-tyrosine phosphatase-like A domain-containing protein 1)	HACD3 BIND1 PTPLAD1	1.69159	1.17088	2.26511	1.12468	0.923151	1.22766	0.216678		1
Q86V81	THOC4_HUMAN	THO complex subunit 4, Tho4 (Ally of AML-1 and LEF-1) (Aly/REF export factor) (Transcriptional coactivator Aly/REF) (bZIP-enhancing factor BEF)	ALYREF ALY BEF THOC4	1.00528	1.27106	1.2464	0.788439	0.823657	0.881438	-0.456047		1
Q53FA7	QORX_HUMAN	Quinone oxidoreductase PIG3, EC 1.6.5.5 (NADPH:quinone reductase PIG3) (Tumor protein p53-inducible protein 3, Protein PIG3) (p53-induced gene 3 protein)	TP53I3 PIG3	1.3002	1.23049	1.29765	1.06801	0.865382	0.949667	-0.0980622		1
O43251	RFOX2_HUMAN	RNA binding protein fox-1 homolog 2 (Fox-1 homolog B) (Hexaribonucleotide-binding protein 2) (RNA-binding motif protein 9) (RNA-binding protein 9) (Repressor of tamoxifen transcriptional activity)	RBFOX2 FOX2 HRNBP2 RBM9 RTA	1.13497	1.7847	1.26242	0.897616	0.891067	0.966326	-0.210109		1
O94905	ERLN2_HUMAN	Erlin-2 (Endoplasmic reticulum lipid raft-associated protein 2) (Stomatin-prohibitin-flotillin-HflC/K domain-containing protein 2, SPFH domain-containing protein 2)	ERLIN2 C8orf2 SPFH2 UNQ2441/PRO5003/PRO9924	1.37462	1.00256	1.09879	1.22969	1.24773	1.24977	0.535296		1
Q9NX62	IMPA3_HUMAN	Golgi-resident adenosine 3',5'-bisphosphate 3'-phosphatase, Golgi-resident PAP phosphatase, gPAPP, EC 3.1.3.7 (3'(2'), 5'-bisphosphate nucleotidase 2) (Inositol monophosphatase domain-containing protein 1) (Myo-inositol monophosphatase A3) (Phosphoadenosine phosphate 3'-nucleotidase)	BPNT2 IMPA3 IMPAD1	1.62858	1.22965	1.73199	1.08505	0.900075	0.954687	-0.049985		1
P61026	RAB10_HUMAN	Ras-related protein Rab-10, EC 3.6.5.2	RAB10	2.01494	2.38476	2.42892	1.30068	0.857646	1.4132	0.430078		1
Q8WUY1	THEM6_HUMAN	Protein THEM6 (Mesenchymal stem cell protein DSCD75) (Thioesterase superfamily member 6)	THEM6 C8orf55 PSEC0098	1.20309	1.8616	1.27838	1.0023	0.950464	0.988489	-0.0487767		1
Q9NXX6	NSE4A_HUMAN	Non-structural maintenance of chromosomes element 4 homolog A, NS4EA, Non-SMC element 4 homolog A	NSMCE4A C10orf86 PP4762	1.07096	1.22263	1.64385	1.02767	0.963788	1.22394	0.171011		1
Q495W5	FUT11_HUMAN	Alpha-(1,3)-fucosyltransferase 11, EC 2.4.1.- (Fucosyltransferase XI, Fuc-TXI, FucT-XI) (Galactoside 3-L-fucosyltransferase 11, Fucosyltransferase 11)	FUT11	1.9924	1.54437	1.66545	1.0564	0.910684	0.994296	-0.0319566		1
P49005	DPOD2_HUMAN	DNA polymerase delta subunit 2 (DNA polymerase delta subunit p50)	POLD2	1.13706	1.28169	1.29072	0.927497	1.02832	0.980939	-0.0525499		1
Q92759	TF2H4_HUMAN	General transcription factor IIH subunit 4 (Basic transcription factor 2 52 kDa subunit, BTF2 p52) (General transcription factor IIH polypeptide 4) (TFIIH basal transcription factor complex p52 subunit)	GTF2H4	2.31073	1.62402	2.68119	1.05351	0.723405	0.790371	-0.384154		1
Q7L5N1	CSN6_HUMAN	COP9 signalosome complex subunit 6, SGN6, Signalosome subunit 6 (JAB1-containing signalosome subunit 6) (MOV34 homolog) (Vpr-interacting protein, hVIP)	COPS6 CSN6 HVIP	1.27064	1.01432	1.21821	0.980437	0.848241	0.804265	-0.321878		1
O00629	IMA3_HUMAN	Importin subunit alpha-3 (Importin alpha Q1, Qip1) (Karyopherin subunit alpha-4)	KPNA4 QIP1	1.66693	1.51328	1.70465	1.1538	0.842903	0.94971	-0.0444516		1
O75718	CRTAP_HUMAN	Cartilage-associated protein	CRTAP CASP	1.29095	1.36688	1.57687	1.04458	0.788161	1.03578	-0.110529		1
P55145	MANF_HUMAN	Mesencephalic astrocyte-derived neurotrophic factor (Arginine-rich protein) (Protein ARMET)	MANF ARMET ARP	1.81143	1.4094	1.45952	0.718811	0.834483	0.769575	-0.630903		1
Q969P0	IGSF8_HUMAN	Immunoglobulin superfamily member 8, IgSF8 (CD81 partner 3) (Glu-Trp-Ile EWI motif-containing protein 2, EWI-2) (Keratinocytes-associated transmembrane protein 4, KCT-4) (LIR-D1) (Prostaglandin regulatory-like protein, PGRL) (CD antigen CD316)	IGSF8 CD81P3 EWI2 KCT4	1.05848	1.56834	1.26809	1.23809	1.273	1.15741	0.49615		1
Q6UWP7	LCLT1_HUMAN	Lysocardiolipin acyltransferase 1, EC 2.3.1.- (1-acylglycerol-3-phosphate O-acyltransferase 8, 1-AGP acyltransferase 8, 1-AGPAT 8, EC 2.3.1.51) (Acyl-CoA:lysocardiolipin acyltransferase 1)	LCLAT1 AGPAT8 ALCAT1 LYCAT UNQ1849/PRO3579	1.89464	1.17431	1.63455	1.14351	0.651628	1.01052	-0.165184		1
P62820	RAB1A_HUMAN	Ras-related protein Rab-1A, EC 3.6.5.2 (YPT1-related protein)	RAB1A RAB1	2.22643	1.30773	1.21145	1.10894	0.693445	1.24434	0.0381103		1
Q9UBU8	MO4L1_HUMAN	Mortality factor 4-like protein 1 (MORF-related gene 15 protein) (Protein MSL3-1) (Transcription factor-like protein MRG15)	MORF4L1 MRG15 FWP006 HSPC008 HSPC061 PP368	1.99061	1.848	2.00596	1.03895	0.777107	1.08152	-0.0856735		1
O15260	SURF4_HUMAN	Surfeit locus protein 4	SURF4 SURF-4	1.53242	1.02102	1.04956	1.2523	0.957465	1.17558	0.298035		1
P62269	RS18_HUMAN	40S ribosomal protein S18 (Ke-3, Ke3) (Small ribosomal subunit protein uS13)	RPS18 D6S218E	2.39661	1.40215	1.83893	0.725373	0.767742	0.952694	-0.503709		1
Q9Y282	ERGI3_HUMAN	Endoplasmic reticulum-Golgi intermediate compartment protein 3 (Serologically defined breast cancer antigen NY-BR-84)	ERGIC3 C20orf47 ERV46 SDBCAG84 CGI-54 PRO0989	2.24597	2.44051	2.2883	1.01848	0.913252	1.01171	-0.0469355		1
O60645	EXOC3_HUMAN	Exocyst complex component 3 (Exocyst complex component Sec6)	EXOC3 SEC6 SEC6L1	1.11176	1.43047	1.18627	0.818549	1.39646	1.10642	0.251033		1
Q8NFQ8	TOIP2_HUMAN	Torsin-1A-interacting protein 2 (Lumenal domain-like LAP1)	TOR1AIP2 IFRG15 LULL1	1.45962	2.06625	1.16718	1.14445	0.869337	0.878827	-0.0899024		1
Q8NCC3	PAG15_HUMAN	Phospholipase A2 group XV (1-O-acylceramide synthase, ACS) (LCAT-like lysophospholipase, LLPL, EC 3.1.1.5) (Lysophospholipase 3) (Lysosomal phospholipase A and acyltransferase, EC 2.3.1.-, EC 3.1.1.32, EC 3.1.1.4) (Lysosomal phospholipase A2, LPLA2)	PLA2G15 LYPLA3 UNQ341/PRO540	1.27305	1.52979	1.05815	1.51329	1.04502	1.02038	0.435017		1
Q9NYL4	FKB11_HUMAN	Peptidyl-prolyl cis-trans isomerase FKBP11, PPIase FKBP11, EC 5.2.1.8 (19 kDa FK506-binding protein, 19 kDa FKBP, FKBP-19) (FK506-binding protein 11, FKBP-11) (Rotamase)	FKBP11 FKBP19 UNQ336/PRO535	2.20095	1.60635	1.81098	1.27496	0.931128	0.905533	0.0900983		1
Q86X55	CARM1_HUMAN	Histone-arginine methyltransferase CARM1, EC 2.1.1.319 (Coactivator-associated arginine methyltransferase 1) (Protein arginine N-methyltransferase 4)	CARM1 PRMT4	1.58021	1.21621	1.72032	1.03777	0.764755	0.938489	-0.222668		1
Q15363	TMED2_HUMAN	Transmembrane emp24 domain-containing protein 2 (Membrane protein p24A) (p24) (p24 family protein beta-1, p24beta1)	TMED2 RNP24	2.08021	1.60811	1.03518	0.945514	0.636205	1.00704	-0.363619		1
P26572	MGAT1_HUMAN	Alpha-1,3-mannosyl-glycoprotein 2-beta-N-acetylglucosaminyltransferase, EC 2.4.1.101 (N-glycosyl-oligosaccharide-glycoprotein N-acetylglucosaminyltransferase I, GNT-I, GlcNAc-T I)	MGAT1 GGNT1 GLCT1 GLYT1 MGAT	1.46331	1.54887	2.0237	1.1916	0.884228	1.00995	0.0695255		1
P57088	TMM33_HUMAN	Transmembrane protein 33 (Protein DB83) (SHINC-3)	TMEM33 DB83	1.88959	1.00211	2.03571	1.22994	0.893367	1.12612	0.196978		1
P59998	ARPC4_HUMAN	Actin-related protein 2/3 complex subunit 4 (Arp2/3 complex 20 kDa subunit, p20-ARC)	ARPC4 ARC20	1.25252	1.09344	1.0541	1.04892	0.905793	1.08248	0.0303933		1
P50613	CDK7_HUMAN	Cyclin-dependent kinase 7, EC 2.7.11.22, EC 2.7.11.23 (39 kDa protein kinase, p39 Mo15) (CDK-activating kinase 1) (Cell division protein kinase 7) (Serine/threonine-protein kinase 1) (TFIIH basal transcription factor complex kinase subunit)	CDK7 CAK CAK1 CDKN7 MO15 STK1	1.60495	1.54658	1.99335	0.951382	0.790099	0.983849	-0.236821		1
Q9H3N1	TMX1_HUMAN	Thioredoxin-related transmembrane protein 1 (Thioredoxin domain-containing protein 1) (Transmembrane Trx-related protein)	TMX1 TMX TXNDC TXNDC1 PSEC0085 UNQ235/PRO268	1.39355	1.38419	1.27828	1.48337	1.00823	1.23144	0.532542		1
O95302	FKBP9_HUMAN	Peptidyl-prolyl cis-trans isomerase FKBP9, PPIase FKBP9, EC 5.2.1.8 (63 kDa FK506-binding protein, 63 kDa FKBP, FKBP-63) (FK506-binding protein 9, FKBP-9) (Rotamase)	FKBP9 FKBP60 FKBP63	1.39348	1.9185	1.84872	1.02042	0.977945	1.051	0.0402573		1
Q9H8S9	MOB1A_HUMAN	MOB kinase activator 1A (Mob1 alpha, Mob1A) (Mob1 homolog 1B) (Mps one binder kinase activator-like 1B)	MOB1A C2orf6 MOB4B MOBK1B MOBKL1B	1.00934	1.39868	1.66126	0.891034	0.858802	0.869716	-0.334453		1
P08579	RU2B_HUMAN	U2 small nuclear ribonucleoprotein B'', U2 snRNP B''	SNRPB2	1.88047	1.78462	1.53033	1.05056	0.801949	1.08557	-0.0514416		1
P50281	MMP14_HUMAN	Matrix metalloproteinase-14, MMP-14, EC 3.4.24.80 (MMP-X1) (Membrane-type matrix metalloproteinase 1, MT-MMP 1, MTMMP1) (Membrane-type-1 matrix metalloproteinase, MT1-MMP, MT1MMP)	MMP14	1.61438	2.12291	1.5534	1.31205	1.00473	1.17113	0.371648		1
Q15014	MO4L2_HUMAN	Mortality factor 4-like protein 2 (MORF-related gene X protein) (Protein MSL3-2) (Transcription factor-like protein MRGX)	MORF4L2 KIAA0026 MRGX	2.15736	1.25812	1.15609	0.833802	0.69175	0.734209	-0.698835		1
Q15008	PSMD6_HUMAN	26S proteasome non-ATPase regulatory subunit 6 (26S proteasome regulatory subunit RPN7) (26S proteasome regulatory subunit S10) (Breast cancer-associated protein SGA-113M) (Phosphonoformate immuno-associated protein 4) (Proteasome regulatory particle subunit p44S10) (p42A)	PSMD6 KIAA0107 PFAAP4	2.03066	1.14147	1.02485	1.06272	0.687011	0.852008	-0.351283		1
Q9UHG3	PCYOX_HUMAN	Prenylcysteine oxidase 1, EC 1.8.3.5 (Prenylcysteine lyase)	PCYOX1 KIAA0908 PCL1 UNQ597/PRO1183	2.02751	1.2992	1.97504	1.06943	0.870191	1.2539	0.154174		1
O15533	TPSN_HUMAN	Tapasin, TPN, TPSN (NGS-17) (TAP-associated protein) (TAP-binding protein)	TAPBP NGS17 TAPA	2.63836	1.4415	1.29273	1.01929	0.797054	0.674061	-0.459142		1
P11166	GTR1_HUMAN	Solute carrier family 2, facilitated glucose transporter member 1 (Glucose transporter type 1, erythrocyte/brain, GLUT-1) (HepG2 glucose transporter)	SLC2A1 GLUT1	1.18901	1.05777	1.24701	1.39114	1.19097	1.5759	0.805064		1
P06865	HEXA_HUMAN	Beta-hexosaminidase subunit alpha, EC 3.2.1.52 (Beta-N-acetylhexosaminidase subunit alpha, Hexosaminidase subunit A) (N-acetyl-beta-glucosaminidase subunit alpha)	HEXA	1.57153	1.16803	1.03094	1.40043	1.11189	1.13789	0.483824		1
Q9H5K3	SG196_HUMAN	Protein O-mannose kinase, POMK, EC 2.7.1.183 (Protein kinase-like protein SgK196) (Sugen kinase 196)	POMK SGK196	1.77487	1.77107	2.04656	1.0871	0.929517	0.951258	-0.0265549		1
P49755	TMEDA_HUMAN	Transmembrane emp24 domain-containing protein 10, Protein TMED10 (21 kDa transmembrane-trafficking protein) (S31I125) (S31III125) (Tmp-21-I) (Transmembrane protein Tmp21) (p23) (p24 family protein delta-1, p24delta1) (p24delta)	TMED10 TMP21	1.42822	1.64593	1.43419	1.13364	1.04302	1.10811	0.223654		1
Q9NZQ3	SPN90_HUMAN	NCK-interacting protein with SH3 domain (54 kDa VacA-interacting protein) (54 kDa vimentin-interacting protein, VIP54) (90 kDa SH3 protein interacting with Nck) (AF3p21) (Dia-interacting protein 1, DIP-1) (Diaphanous protein-interacting protein) (SH3 adapter protein SPIN90) (WASP-interacting SH3-domain protein, WISH) (Wiskott-Aldrich syndrome protein-interacting protein)	NCKIPSD AF3P21 SPIN90	1.16158	2.17574	1.00854	0.9932	1.09365	1.03404	0.0974315		1
Q8N8S7	ENAH_HUMAN	Protein enabled homolog	ENAH MENA	1.5429	1.10396	1.02392	1.09376	1.07072	1.17627	0.265331		1
Q6IAA8	LTOR1_HUMAN	Ragulator complex protein LAMTOR1 (Late endosomal/lysosomal adaptor and MAPK and MTOR activator 1) (Lipid raft adaptor protein p18) (Protein associated with DRMs and endosomes) (p27Kip1-releasing factor from RhoA, p27RF-Rho)	LAMTOR1 C11orf59 PDRO PP7157	1.82473	1.40472	1.4573	1.09223	0.84125	1.16204	0.0772987		1
Q9BU23	LMF2_HUMAN	Lipase maturation factor 2 (Transmembrane protein 112B) (Transmembrane protein 153)	LMF2 TMEM112B TMEM153	2.62814	1.04441	1.94469	1.74776	0.696958	1.41171	0.619362		1
P13987	CD59_HUMAN	CD59 glycoprotein (1F5 antigen) (20 kDa homologous restriction factor, HRF-20, HRF20) (MAC-inhibitory protein, MAC-IP) (MEM43 antigen) (Membrane attack complex inhibition factor, MACIF) (Membrane inhibitor of reactive lysis, MIRL) (Protectin) (CD antigen CD59)	CD59 MIC11 MIN1 MIN2 MIN3 MSK21	2.88882	1.97289	1.32489	1.28766	0.963529	0.632845	-0.0972272		1
Q9BPX5	ARP5L_HUMAN	Actin-related protein 2/3 complex subunit 5-like protein (Arp2/3 complex 16 kDa subunit 2, ARC16-2)	ARPC5L	1.47786	1.64661	1.55611	0.826219	0.821271	0.76804	-0.534432		1
Q8N0U8	VKORL_HUMAN	Vitamin K epoxide reductase complex subunit 1-like protein 1, VKORC1-like protein 1, EC 1.17.4.4	VKORC1L1	2.3175	1.47254	2.24328	1.26088	0.78496	1.12214	0.134366		1
Q8NCH0	CHSTE_HUMAN	Carbohydrate sulfotransferase 14, EC 2.8.2.35 (Dermatan 4-sulfotransferase 1, D4ST-1, hD4ST1)	CHST14 D4ST1 UNQ1925/PRO4400	1.03662	1.59044	1.03803	1.09575	0.990049	0.980297	0.0537498		1
P13747	HLAE_HUMAN	HLA class I histocompatibility antigen, alpha chain E (MHC class I antigen E) [Cleaved into: Soluble HLA class I histocompatibility antigen, alpha chain E, sHLA-E ]	HLA-E HLA-6.2 HLAE	1.72791	1.44918	1.74194	0.872139	0.775224	0.8073	-0.494797		1
P48060	GLIP1_HUMAN	Glioma pathogenesis-related protein 1, GliPR 1 (Protein RTVP-1)	GLIPR1 GLIPR RTVP1	1.5059	1.6945	1.50742	0.965223	1.0145	0.919318	-0.0844272		1
Q14332	FZD2_HUMAN	Frizzled-2, Fz-2, hFz2 (FzE2)	FZD2	1.55749	1.97321	1.22982	1.31262	1.31344	1.2274	0.617462		1
P07099	HYEP_HUMAN	Epoxide hydrolase 1, EC 3.3.2.9 (Epoxide hydratase) (Microsomal epoxide hydrolase, mEH)	EPHX1 EPHX EPOX	1.73283	1.16196	1.1111	1.14274	0.728215	0.995526	-0.112282		1
O14656	TOR1A_HUMAN	Torsin-1A (Dystonia 1 protein) (Torsin ATPase-1A, EC 3.6.4.-) (Torsin family 1 member A)	TOR1A DQ2 DYT1 TA TORA	1.17974	1.51879	2.20759	0.917052	0.847295	0.969851	-0.228809		1
P62841	RS15_HUMAN	40S ribosomal protein S15 (RIG protein) (Small ribosomal subunit protein uS19)	RPS15 RIG	1.20809	2.00814	1.34375	0.662973	0.957622	0.929894	-0.400348		1
A0PJW6	TM223_HUMAN	Transmembrane protein 223	TMEM223	1.68387	1.5626	1.96669	1.58169	1.35835	1.45193	0.940072		1
Q9UBW8	CSN7A_HUMAN	COP9 signalosome complex subunit 7a, SGN7a, Signalosome subunit 7a (Dermal papilla-derived protein 10) (JAB1-containing signalosome subunit 7a)	COPS7A CSN7A DERP10	2.54165	1.31347	1.58103	1.05615	0.674393	0.951665	-0.276158		1
P08236	BGLR_HUMAN	Beta-glucuronidase, EC 3.2.1.31 (Beta-G1)	GUSB	1.08482	1.35044	1.19654	1.28738	1.44814	0.956859	0.512147		1
P54619	AAKG1_HUMAN	5'-AMP-activated protein kinase subunit gamma-1, AMPK gamma1, AMPK subunit gamma-1, AMPKg	PRKAG1	2.1155	1.22762	2.46957	1.06688	0.718719	1.33627	0.0982031		1
Q15257	PTPA_HUMAN	Serine/threonine-protein phosphatase 2A activator, EC 5.2.1.8 (PP2A, subunit B', PR53 isoform) (Phosphotyrosyl phosphatase activator, PTPA) (Serine/threonine-protein phosphatase 2A regulatory subunit 4) (Serine/threonine-protein phosphatase 2A regulatory subunit B')	PTPA PPP2R4	1.74797	1.50887	2.01576	2.17897	0.732298	1.28272	0.826311		1
P49642	PRI1_HUMAN	DNA primase small subunit, EC 2.7.7.102 (DNA primase 49 kDa subunit, p49)	PRIM1	1.03355	2.10696	1.56681	0.970919	0.864417	0.943368	-0.188988		1
P07305	H10_HUMAN	Histone H1.0 (Histone H1') (Histone H1(0)) [Cleaved into: Histone H1.0, N-terminally processed ]	H1-0 H1F0 H1FV	2.13329	1.85968	1.44256	1.3387	1.99762	1.06573	0.945727		1
Q01105	SET_HUMAN	Protein SET (HLA-DR-associated protein II) (Inhibitor of granzyme A-activated DNase, IGAAD) (PHAPII) (Phosphatase 2A inhibitor I2PP2A, I-2PP2A) (Template-activating factor I, TAF-I)	SET	1.53382	1.18031	1.60236	0.909397	1.09012	1.19883	0.157899		1
Q9UNW1	MINP1_HUMAN	Multiple inositol polyphosphate phosphatase 1, EC 3.1.3.62 (2,3-bisphosphoglycerate 3-phosphatase, 2,3-BPG phosphatase, EC 3.1.3.80) (Inositol (1,3,4,5)-tetrakisphosphate 3-phosphatase, Ins(1,3,4,5)P(4) 3-phosphatase)	MINPP1 MIPP UNQ900/PRO1917	1.31464	1.03094	1.45679	1.02386	0.854871	0.803452	-0.276182		1
P48509	CD151_HUMAN	CD151 antigen (GP27) (Membrane glycoprotein SFA-1) (Platelet-endothelial tetraspan antigen 3, PETA-3) (Tetraspanin-24, Tspan-24) (CD antigen CD151)	CD151 TSPAN24	2.44151	3.17162	2.9074	1.81344	0.942777	1.25712	0.717719		1
O95070	YIF1A_HUMAN	Protein YIF1A (54TMp) (YIP1-interacting factor homolog A)	YIF1A 54TM HYIF1P YIF1	2.33876	1.39717	1.68633	1.47994	0.8793	1.26034	0.463039		1
Q9BQE5	APOL2_HUMAN	Apolipoprotein L2 (Apolipoprotein L-II, ApoL-II)	APOL2	1.85506	1.61506	1.82576	0.789044	0.928094	0.91576	-0.32192		1
Q92581	SL9A6_HUMAN	Sodium/hydrogen exchanger 6 (Na(+)/H(+) exchanger 6, NHE-6) (Solute carrier family 9 member 6)	SLC9A6 KIAA0267 NHE6	2.24362	1.40344	1.63715	1.17418	0.903882	1.4851	0.424295		1
O43324	MCA3_HUMAN	Eukaryotic translation elongation factor 1 epsilon-1 (Aminoacyl tRNA synthetase complex-interacting multifunctional protein 3) (Elongation factor p18) (Multisynthase complex auxiliary component p18)	EEF1E1 AIMP3 P18	2.27511	1.79975	1.39326	1.25891	0.817104	1.03567	0.0901448		1
Q86VR2	RETR3_HUMAN	Reticulophagy regulator 3	RETREG3 FAM134C	1.31057	1.22326	1.31923	0.98141	0.797942	0.988979	-0.198211		1
Q9UEU0	VTI1B_HUMAN	Vesicle transport through interaction with t-SNAREs homolog 1B (Vesicle transport v-SNARE protein Vti1-like 1) (Vti1-rp1)	VTI1B VTI1 VTI1L VTI1L1 VTI2	2.75461	1.01588	1.99291	0.933916	0.803207	0.876105	-0.340414		1
P16949	STMN1_HUMAN	Stathmin (Leukemia-associated phosphoprotein p18) (Metablastin) (Oncoprotein 18, Op18) (Phosphoprotein p19, pp19) (Prosolin) (Protein Pr22) (pp17)	STMN1 C1orf215 LAP18 OP18	1.60722	1.43855	1.27015	0.884679	0.811017	1.2078	-0.0806403		1
Q9BQ51	PD1L2_HUMAN	Programmed cell death 1 ligand 2, PD-1 ligand 2, PD-L2, PDCD1 ligand 2, Programmed death ligand 2 (Butyrophilin B7-DC, B7-DC) (CD antigen CD273)	PDCD1LG2 B7DC CD273 PDCD1L2 PDL2	1.77375	2.24247	2.08844	1.31854	1.22316	1.35239	0.643324		1
Q5EB52	MEST_HUMAN	Mesoderm-specific transcript homolog protein, EC 3.-.-.- (Paternally-expressed gene 1 protein)	MEST PEG1	2.25538	1.91555	1.65155	1.17387	0.728574	0.973259	-0.104357		1
Q9Y376	CAB39_HUMAN	Calcium-binding protein 39 (MO25alpha) (Protein Mo25)	CAB39 MO25 CGI-66	1.75088	1.15586	1.57244	0.862544	0.622119	0.955068	-0.509845		1
Q8NHH9	ATLA2_HUMAN	Atlastin-2, EC 3.6.5.- (ADP-ribosylation factor-like protein 6-interacting protein 2, ARL-6-interacting protein 2, Aip-2)	ATL2 ARL6IP2	1.03967	1.11795	1.223	1.09502	0.838066	0.844367	-0.190098		1
O60925	PFD1_HUMAN	Prefoldin subunit 1	PFDN1 PFD1	2.31046	2.0334	1.43097	0.937794	0.750684	0.861554	-0.40079		1
Q5BJF2	SGMR2_HUMAN	Sigma intracellular receptor 2, Sigma-2 receptor, Sigma2 receptor (Meningioma-associated protein 30) (Transmembrane protein 97)	TMEM97 MAC30 S2R	1.92524	1.14526	1.63597	1.19638	0.890019	1.24626	0.259351		1
Q96A73	P33MX_HUMAN	Putative monooxygenase p33MONOX, EC 1.-.-.- (Brain-derived rescue factor p60MONOX) (Flavin monooxygenase motif-containing protein of 33 kDa)	KIAA1191 P33MONOX	2.19229	1.14025	1.5717	0.688655	0.774358	0.783445	-0.713397		1
O00115	DNS2A_HUMAN	Deoxyribonuclease-2-alpha, EC 3.1.22.1 (Acid DNase) (Deoxyribonuclease II alpha, DNase II alpha) (Lysosomal DNase II) (R31240_2)	DNASE2 DNASE2A DNL2	1.80742	1.6646	1.50216	1.44183	1.39877	0.992562	0.604437		1
Q6DKI1	RL7L_HUMAN	60S ribosomal protein L7-like 1 (Large ribosomal subunit protein uL30-like 1)	RPL7L1	2.34532	1.63658	2.25704	1.09126	1.16912	1.07775	0.263397		1
Q6I9Y2	THOC7_HUMAN	THO complex subunit 7 homolog (Functional spliceosome-associated protein 24, fSAP24) (Ngg1-interacting factor 3-like protein 1-binding protein 1, NIF3L1-binding protein 1) (hTREX30)	THOC7 NIF3L1BP1	2.11346	1.61687	1.30773	0.971182	0.842403	1.06555	-0.101417		1
P61769	B2MG_HUMAN	Beta-2-microglobulin [Cleaved into: Beta-2-microglobulin form pI 5.3 ]	B2M CDABP0092 HDCMA22P	2.82614	2.53457	1.93325	0.932921	1.28057	0.644615	-0.119496		1
Q9Y624	JAM1_HUMAN	Junctional adhesion molecule A, JAM-A (Junctional adhesion molecule 1, JAM-1) (Platelet F11 receptor) (Platelet adhesion molecule 1, PAM-1) (CD antigen CD321)	F11R JAM1 JCAM UNQ264/PRO301	1.04007	1.52377	1.45227	1.13292	1.13763	0.973945	0.193232		1
Q9Y6G5	COMDA_HUMAN	COMM domain-containing protein 10	COMMD10 HSPC305 PTD002	1.14534	1.92252	1.66113	0.76917	0.920237	0.918092	-0.345828		1
P20645	MPRD_HUMAN	Cation-dependent mannose-6-phosphate receptor, CD Man-6-P receptor, CD-MPR (46 kDa mannose 6-phosphate receptor, MPR 46)	M6PR MPR46 MPRD	1.52058	1.51375	1.85023	1.24761	0.997831	1.16589	0.316892		1
Q92973	TNPO1_HUMAN	Transportin-1 (Importin beta-2) (Karyopherin beta-2) (M9 region interaction protein, MIP)	TNPO1 KPNB2 MIP1 TRN	1.19155	1.08894	0.682302	1.06653	0.971856	1.05917	0.0789245		1
O60306	AQR_HUMAN	RNA helicase aquarius, EC 3.6.4.13 (Intron-binding protein of 160 kDa, IBP160)	AQR KIAA0560	1.14999	1.02292	0.72448	1.11258	1.26709	1.08845	0.357619		1
P68400	CSK21_HUMAN	Casein kinase II subunit alpha, CK II alpha, EC 2.7.11.1	CSNK2A1 CK2A1	1.38428	1.25594	0.969479	0.952079	0.847406	0.866972	-0.290683		1
P11717	MPRI_HUMAN	Cation-independent mannose-6-phosphate receptor, CI Man-6-P receptor, CI-MPR, M6PR (300 kDa mannose 6-phosphate receptor, MPR 300) (Insulin-like growth factor 2 receptor) (Insulin-like growth factor II receptor, IGF-II receptor) (M6P/IGF2 receptor, M6P/IGF2R) (CD antigen CD222)	IGF2R MPRI	1.03344	1.06851	0.767147	1.16025	1.40086	1.26755	0.601534		1
O95816	BAG2_HUMAN	BAG family molecular chaperone regulator 2, BAG-2 (Bcl-2-associated athanogene 2)	BAG2	1.13401	1.19335	0.611511	0.859743	0.947089	0.890255	-0.262513		1
Q9BTV4	TMM43_HUMAN	Transmembrane protein 43 (Protein LUMA)	TMEM43 UNQ2564/PRO6244	1.77039	1.79438	0.668973	1.26361	0.878532	1.02003	0.129839		1
Q8TBA6	GOGA5_HUMAN	Golgin subfamily A member 5 (Cell proliferation-inducing gene 31 protein) (Golgin-84) (Protein Ret-II) (RET-fused gene 5 protein)	GOLGA5 RETII RFG5 PIG31	1.36408	1.42552	0.976681	0.931152	0.937994	0.883178	-0.212513		1
P78316	NOP14_HUMAN	Nucleolar protein 14 (Nucleolar complex protein 14)	NOP14 C4orf9 NOL14 RES4-25	1.07392	1.17757	0.605997	1.17999	1.25496	1.03276	0.357324		1
Q15435	PP1R7_HUMAN	Protein phosphatase 1 regulatory subunit 7 (Protein phosphatase 1 regulatory subunit 22)	PPP1R7 SDS22	1.00708	1.23251	0.661198	0.886481	0.858045	1.02109	-0.20063		1
O75448	MED24_HUMAN	Mediator of RNA polymerase II transcription subunit 24 (Activator-recruited cofactor 100 kDa component, ARC100) (Cofactor required for Sp1 transcriptional activation subunit 4, CRSP complex subunit 4) (Mediator complex subunit 24) (Thyroid hormone receptor-associated protein 4) (Thyroid hormone receptor-associated protein complex 100 kDa component, Trap100, hTRAP100) (Vitamin D3 receptor-interact…	MED24 ARC100 CRSP4 DRIP100 KIAA0130 THRAP4 TRAP100	1.19726	1.1606	0.749573	1.12319	0.885971	0.984131	-0.00552325		1
Q8IV08	PLD3_HUMAN	5'-3' exonuclease PLD3, EC 3.1.16.1 (Choline phosphatase 3) (HindIII K4L homolog) (Hu-K4) (Phosphatidylcholine-hydrolyzing phospholipase D3) (Phospholipase D3, PLD 3)	PLD3	1.28663	1.08895	0.909383	1.47912	1.12017	1.14551	0.546921		1
Q9NQG5	RPR1B_HUMAN	Regulation of nuclear pre-mRNA domain-containing protein 1B (Cell cycle-related and expression-elevated protein in tumor)	RPRD1B C20orf77 CREPT	2.00648	1.11475	0.898131	1.0136	0.831813	1.06246	-0.0769251		1
Q14344	GNA13_HUMAN	Guanine nucleotide-binding protein subunit alpha-13, G alpha-13, G-protein subunit alpha-13	GNA13	2.14712	1.018	-0.457704	1.16627	0.83095	1.31888	0.247068		1
Q15907	RB11B_HUMAN	Ras-related protein Rab-11B, EC 3.6.5.2 (GTP-binding protein YPT3)	RAB11B YPT3	3.15886	3.11086		0.976411	0.978622	1.085	0.0326949		1
Q9BT22	ALG1_HUMAN	Chitobiosyldiphosphodolichol beta-mannosyltransferase, EC 2.4.1.142 (Asparagine-linked glycosylation protein 1 homolog) (Beta-1,4-mannosyltransferase) (GDP-Man:GlcNAc2-PP-dolichol mannosyltransferase) (GDP-mannose-dolichol diphosphochitobiose mannosyltransferase) (Mannosyltransferase-1, MT-1, hMat-1)	ALG1 HMAT1 HMT1 PSEC0061 UNQ861/PRO1870	1.27214	1.57207	0.41556	1.08123	0.904732	1.00749	-0.00538706		1
P61019	RAB2A_HUMAN	Ras-related protein Rab-2A, EC 3.6.5.2	RAB2A RAB2	1.25979	1.09384	0.888354	1.11534	0.966926	1.33568	0.321674		1
Q9GZS3	WDR61_HUMAN	WD repeat-containing protein 61 (Meiotic recombination REC14 protein homolog) (SKI8 homolog, Ski8) [Cleaved into: WD repeat-containing protein 61, N-terminally processed ]	WDR61	1.60031	1.83176	0.596116	0.855872	0.973469	0.864715	-0.265286		1
Q07960	RHG01_HUMAN	Rho GTPase-activating protein 1 (CDC42 GTPase-activating protein) (GTPase-activating protein rhoGAP) (Rho-related small GTPase protein activator) (Rho-type GTPase-activating protein 1) (p50-RhoGAP)	ARHGAP1 CDC42GAP RHOGAP1	1.70656	1.39744	0.689746	1.27661	0.896725	1.03182	0.163146		1
O75787	RENR_HUMAN	Renin receptor (ATPase H(+)-transporting lysosomal accessory protein 2) (ATPase H(+)-transporting lysosomal-interacting protein 2) (ER-localized type I transmembrane adapter) (Embryonic liver differentiation factor 10) (N14F) (Renin/prorenin receptor) (Vacuolar ATP synthase membrane sector-associated protein M8-9, ATP6M8-9, V-ATPase M8.9 subunit) [Cleaved into: Renin receptor N-terminal fragment;…	ATP6AP2 ATP6IP2 CAPER ELDF10 HT028 MSTP009 PSEC0072	1.18717	1.18664	-0.398235	1.14492	0.879949	0.992406	0.0141575		1
Q9UJ83	HACL1_HUMAN	2-hydroxyacyl-CoA lyase 1, EC 4.1.2.63 (2-hydroxyphytanoyl-CoA lyase, 2-HPCL) (Phytanoyl-CoA 2-hydroxylase 2)	HACL1 HPCL HPCL2 PHYH2 HSPC279	1.23122	1.38571	0.342287	1.13684	1.14432	1.0347	0.246881		1
Q03135	CAV1_HUMAN	Caveolin-1	CAV1 CAV	2.67841	1.97677	0.201752	1.20688	0.865333	0.924973	-0.00231577		1
Q969N2	PIGT_HUMAN	GPI transamidase component PIG-T (Phosphatidylinositol-glycan biosynthesis class T protein)	PIGT CGI-06 PSEC0163 UNQ716/PRO1379	1.18632	1.31106	0.837341	1.11157	0.873616	0.944883	-0.0581687		1
Q9Y4C2	TCAF1_HUMAN	TRPM8 channel-associated factor 1 (TRP channel-associated factor 1)	TCAF1 FAM115A KIAA0738	1.31021	1.76549	0.921067	0.690807	0.809592	0.687988	-0.77799		1
P98155	VLDLR_HUMAN	Very low-density lipoprotein receptor, VLDL receptor, VLDL-R	VLDLR	1.04483	1.09416	-0.172771	1.61131	1.44082	1.79822	1.18491		1
Q12841	FSTL1_HUMAN	Follistatin-related protein 1 (Follistatin-like protein 1)	FSTL1 FRP	1.58343	1.24547	0.35301	1.19542	0.982825	0.917963	0.0778477		1
Q96FW1	OTUB1_HUMAN	Ubiquitin thioesterase OTUB1, EC 3.4.19.12 (Deubiquitinating enzyme OTUB1) (OTU domain-containing ubiquitin aldehyde-binding protein 1) (Otubain-1, hOTU1) (Ubiquitin-specific-processing protease OTUB1)	OTUB1 OTB1 OTU1 HSPC263	1.20939	1.35764	-0.289287	1.31655	1.30433	1.18632	0.587672		1
P28799	GRN_HUMAN	Progranulin, PGRN (Acrogranin) (Epithelin precursor) (Glycoprotein of 88 Kda, GP88, Glycoprotein 88) (Granulin precursor) (PC cell-derived growth factor, PCDGF) (Proepithelin, PEPI) [Cleaved into: Paragranulin; Granulin-1 (Granulin G); Granulin-2 (Granulin F); Granulin-3 (Epithelin-2) (Granulin B); Granulin-4 (Epithelin-1) (Granulin A); Granulin-5 (Granulin C); Granulin-6 (Granulin D); Granulin-7…	GRN	1.40425	1.91038	0.300554	1.13177	1.15915	1.13198	0.325241		1
Q6ZWT7	MBOA2_HUMAN	Lysophospholipid acyltransferase 2, LPLAT 2, EC 2.3.1.- (1-acylglycerophosphate O-acyltransferase MBOAT2, EC 2.3.1.51) (1-acylglycerophosphocholine O-acyltransferase MBOAT2, EC 2.3.1.23) (1-acylglycerophosphoethanolamine MBOAT2 O-acyltransferase, EC 2.3.1.n7) (Lysophosphatidic acid acyltransferase, LPAAT, Lyso-PA acyltransferase) (Lysophosphatidylcholine acyltransferase, LPCAT, Lyso-PC acyltransf…	MBOAT2 LPCAT4 OACT2	1.53409	1.11213	0.903441	1.15415	1.09625	0.972558	0.176799		1
O00754	MA2B1_HUMAN	Lysosomal alpha-mannosidase, Laman, EC 3.2.1.24 (Lysosomal acid alpha-mannosidase) (Mannosidase alpha class 2B member 1) (Mannosidase alpha-B) [Cleaved into: Lysosomal alpha-mannosidase A peptide; Lysosomal alpha-mannosidase B peptide; Lysosomal alpha-mannosidase C peptide; Lysosomal alpha-mannosidase D peptide; Lysosomal alpha-mannosidase E peptide ]	MAN2B1 LAMAN MANB	1.02027	1.19643	-0.197755	1.4301	1.351	1.04399	0.599239		1
P62314	SMD1_HUMAN	Small nuclear ribonucleoprotein Sm D1, Sm-D1 (Sm-D autoantigen) (snRNP core protein D1)	SNRPD1	1.60507	1.584	0.805274	0.938886	1.11017	1.02279	0.0583655		1
O95864	FADS2_HUMAN	Acyl-CoA 6-desaturase, EC 1.14.19.3 (Delta(6) fatty acid desaturase, D6D, Delta(6) desaturase, Delta-6 desaturase) (Fatty acid desaturase 2)	FADS2	2.39018	1.45189		1.31415	0.852897	0.87136	0.03137		1
Q9H553	ALG2_HUMAN	Alpha-1,3/1,6-mannosyltransferase ALG2, EC 2.4.1.132, EC 2.4.1.257 (Asparagine-linked glycosylation protein 2 homolog) (GDP-Man:Man(1)GlcNAc(2)-PP-Dol alpha-1,3-mannosyltransferase) (GDP-Man:Man(1)GlcNAc(2)-PP-dolichol mannosyltransferase) (GDP-Man:Man(2)GlcNAc(2)-PP-Dol alpha-1,6-mannosyltransferase)	ALG2 UNQ666/PRO1298	1.20454	1.14539	0.636741	0.987519	0.850256	0.702678	-0.410071		1
O14972	VP26C_HUMAN	Vacuolar protein sorting-associated protein 26C (Down syndrome critical region protein 3) (Down syndrome critical region protein A)	VPS26C DCRA DSCR3 DSCRA	1.22329	1.13633	0.787732	1.09736	1.14402	1.22227	0.354437		1
Q9NVH2	INT7_HUMAN	Integrator complex subunit 7, Int7	INTS7 C1orf73	1.0768	1.03898	0.291296	0.821823	0.824424	0.822306	-0.48088		1
P51809	VAMP7_HUMAN	Vesicle-associated membrane protein 7, VAMP-7 (Synaptobrevin-like protein 1) (Tetanus-insensitive VAMP, Ti-VAMP)	VAMP7 SYBL1	1.11423	1.00703		1.14294	1.02446		0.198238		1
Q9Y312	AAR2_HUMAN	Protein AAR2 homolog (AAR2 splicing factor homolog)	AAR2 C20orf4 CGI-23 PRO0225	1.93186	1.59944	0.741951	0.955267	0.819358	0.85138	-0.328385		1
Q9BZQ6	EDEM3_HUMAN	ER degradation-enhancing alpha-mannosidase-like protein 3, EC 3.2.1.113 (Alpha-1,2-mannosidase EDEM3)	EDEM3 C1orf22	1.28955	1.15321	0.566999	1.01085	1.26297	1.12511	0.307914		1
Q9H0V9	LMA2L_HUMAN	VIP36-like protein (Lectin mannose-binding 2-like, LMAN2-like protein)	LMAN2L VIPL PSEC0028 UNQ368/PRO704	2.61994	1.25145		1.07423	0.57086	0.895095	-0.410333		1
O15400	STX7_HUMAN	Syntaxin-7	STX7	1.28359	1.42194	0.140702	1.16167	0.991063	0.897259	0.0407634		1
Q9UNN8	EPCR_HUMAN	Endothelial protein C receptor (Activated protein C receptor, APC receptor) (Endothelial cell protein C receptor) (CD antigen CD201)	PROCR EPCR	1.14955	1.96277	0.832126	1.12054	1.19993	1.06274	0.296486		1
P51153	RAB13_HUMAN	Ras-related protein Rab-13 (Cell growth-inhibiting gene 4 protein)	RAB13 GIG4	1.52528	1.02922	0.945993	1.05956	0.876257	1.14974	0.0693578		1
Q9NV96	CC50A_HUMAN	Cell cycle control protein 50A (P4-ATPase flippase complex beta subunit TMEM30A) (Transmembrane protein 30A)	TMEM30A C6orf67 CDC50A	1.57829	2.19456	0.779447	1.17284	1.17093	1.32947	0.499331		1
P49902	5NTC_HUMAN	Cytosolic purine 5'-nucleotidase, EC 3.1.3.5, EC 3.1.3.99 (Cytosolic 5'-nucleotidase II, cN-II) (Cytosolic IMP/GMP-specific 5'-nucleotidase) (Cytosolic nucleoside phosphotransferase 5'N, EC 2.7.1.77) (High Km 5'-nucleotidase)	NT5C2 NT5B NT5CP PNT5	1.60048	1.26396	0.688123	1.09971	1.10067	0.744661	-0.0456017		1
Q8NBL1	PGLT1_HUMAN	Protein O-glucosyltransferase 1, EC 2.4.1.376 (CAP10-like 46 kDa protein, hCLP46) (KTEL motif-containing protein 1) (Myelodysplastic syndromes relative protein) (O-glucosyltransferase Rumi homolog, hRumi) (Protein O-xylosyltransferase POGLUT1, EC 2.4.2.63)	POGLUT1 C3orf9 CLP46 KTELC1 MDSRP MDS010 UNQ490/PRO1006	1.34493	1.27017	0.691844	1.2547	0.930165	0.951749	0.109831		1
Q92520	FAM3C_HUMAN	Protein FAM3C (Interleukin-like EMT inducer)	FAM3C ILEI GS3786	1.329	1.33061	0.361699	1.06999	0.734166	0.729919	-0.416269		1
O15439	MRP4_HUMAN	ATP-binding cassette sub-family C member 4, EC 7.6.2.-, EC 7.6.2.2, EC 7.6.2.3 (MRP/cMOAT-related ABC transporter) (Multi-specific organic anion transporter B, MOAT-B) (Multidrug resistance-associated protein 4)	ABCC4 MOATB MRP4	1.12195	1.96799		1.19377	1.27127		0.51561		1
Q92600	CNOT9_HUMAN	CCR4-NOT transcription complex subunit 9 (Cell differentiation protein RQCD1 homolog, Rcd-1)	CNOT9 RCD1 RQCD1	1.35472	1.14974		1.17194	0.850826		0.0279203		1
Q9UKM7	MA1B1_HUMAN	Endoplasmic reticulum mannosyl-oligosaccharide 1,2-alpha-mannosidase, EC 3.2.1.113 (ER alpha-1,2-mannosidase) (ER mannosidase 1, ERMan1) (Man9GlcNAc2-specific-processing alpha-mannosidase) (Mannosidase alpha class 1B member 1)	MAN1B1 UNQ747/PRO1477	1.06255	2.12194	0.812455	0.985167	0.965368	0.987787	-0.0512341		1
Q9UNK0	STX8_HUMAN	Syntaxin-8	STX8	1.64675	1.06511		1.04443	0.868506		-0.109764		1
Q8NB37	GALD1_HUMAN	Glutamine amidotransferase-like class 1 domain-containing protein 1 (Parkinson disease 7 domain-containing protein 1)	GATD1 PDDC1	1.05354	1.01934	0.813487	0.898464	0.874981	1.09644	-0.109356		1
P21283	VATC1_HUMAN	V-type proton ATPase subunit C 1, V-ATPase subunit C 1 (Vacuolar proton pump subunit C 1)	ATP6V1C1 ATP6C ATP6D VATC	1.03685	1.1532	0.944584	0.944592	0.850108	0.893751	-0.270423		1
Q9BVG9	PTSS2_HUMAN	Phosphatidylserine synthase 2, PSS-2, PtdSer synthase 2, EC 2.7.8.29 (Serine-exchange enzyme II)	PTDSS2 PSS2	1.52921	1.85468	0.999032	1.10624	0.867844	1.39299	0.284689		1
P30825	SL7A1_HUMAN	High affinity cationic amino acid transporter 1, CAT-1, CAT1 (Ecotropic retroviral leukemia receptor homolog) (Ecotropic retrovirus receptor homolog) (Solute carrier family 7 member 1) (System Y+ basic amino acid transporter)	SLC7A1 ATRC1 ERR REC1L	1.4049	1.03438	0.667459	1.56494	1.27041	1.48092	0.897193		1
Q9H6E4	CC134_HUMAN	Coiled-coil domain-containing protein 134	CCDC134	1.64661	1.22541	0.193356	0.990979	0.770848	0.837238	-0.353817		1
Q9HCU5	PREB_HUMAN	Prolactin regulatory element-binding protein (Mammalian guanine nucleotide exchange factor mSec12)	PREB SEC12	1.27198	1.61714	-0.0726726	1.10611	0.969161	1.04232	0.094824		1
O75525	KHDR3_HUMAN	KH domain-containing, RNA-binding, signal transduction-associated protein 3 (RNA-binding protein T-Star) (Sam68-like mammalian protein 2, SLM-2) (Sam68-like phosphotyrosine protein)	KHDRBS3 SALP SLM2	1.62933	1.06067		1.3968	1.25564		0.69632		1
O95671	ASML_HUMAN	Probable bifunctional dTTP/UTP pyrophosphatase/methyltransferase protein [Includes: dTTP/UTP pyrophosphatase, dTTPase/UTPase, EC 3.6.1.9 (Nucleoside triphosphate pyrophosphatase) (Nucleotide pyrophosphatase, Nucleotide PPase); N-acetylserotonin O-methyltransferase-like protein, ASMTL, EC 2.1.1.- ]	ASMTL	1.37155	1.35947		0.774466	1.27162	1.27593	0.251467		1
P62304	RUXE_HUMAN	Small nuclear ribonucleoprotein E, snRNP-E (Sm protein E, Sm-E, SmE)	SNRPE	1.36511	1.1546	0.365108	1.06024	1.07101	1.01117	0.114384		1
P61244	MAX_HUMAN	Protein max (Class D basic helix-loop-helix protein 4, bHLHd4) (Myc-associated factor X)	MAX BHLHD4	1.04399	1.21578		0.860788	0.760603		-0.517586		1
Q96G23	CERS2_HUMAN	Ceramide synthase 2, CerS2 (LAG1 longevity assurance homolog 2) (SP260) (Sphingosine N-acyltransferase CERS2, EC 2.3.1.24) (Tumor metastasis-suppressor gene 1 protein) (Very-long-chain ceramide synthase CERS2, EC 2.3.1.297)	CERS2 LASS2 TMSG1	1.44268	1.9952		1.23824	0.691307		-0.0884509		1
P98179	RBM3_HUMAN	RNA-binding protein 3 (RNA-binding motif protein 3) (RNPL)	RBM3 RNPL	2.76756	1.4778		0.828995	0.988267		-0.236313		1
Q06481	APLP2_HUMAN	Amyloid beta precursor like protein 2 (APPH) (Amyloid beta (A4) precursor-like protein 2) (Amyloid protein homolog) (Amyloid-like protein 2, APLP-2) (CDEI box-binding protein, CDEBP) (Sperm membrane protein YWK-II)	APLP2 APPL2	1.72673	1.29207		1.00099	0.742278		-0.338841		1
Q9P0T7	TMEM9_HUMAN	Proton-transporting V-type ATPase complex assembly regulator TMEM9, v-ATPase assembly regulator TMEM9 (Dermal papilla-derived protein 4) (Transmembrane protein 9, Protein TMEM9)	TMEM9 DERP4 TMEM9A HSPC186 PSEC0012 UNQ631/PRO1248	2.3624	2.10193		0.861546	0.517974		-0.916014		1
Q14435	GALT3_HUMAN	Polypeptide N-acetylgalactosaminyltransferase 3, EC 2.4.1.41 (Polypeptide GalNAc transferase 3, GalNAc-T3, pp-GaNTase 3) (Protein-UDP acetylgalactosaminyltransferase 3) (UDP-GalNAc:polypeptide N-acetylgalactosaminyltransferase 3)	GALNT3	1.87589	1.55641	0.157357	1.40353	1.62762	0.941057	0.692315		1
Q6UVK1	CSPG4_HUMAN	Chondroitin sulfate proteoglycan 4 (Chondroitin sulfate proteoglycan NG2) (Melanoma chondroitin sulfate proteoglycan) (Melanoma-associated chondroitin sulfate proteoglycan)	CSPG4 MCSP	1.02357	0.662234	1.09482	1.27548	1.33854	1.2351	0.614679		1
O14980	XPO1_HUMAN	Exportin-1, Exp1 (Chromosome region maintenance 1 protein homolog)	XPO1 CRM1	1.25806	0.942264	1.34595	1.08792	1.02057	1.18613	0.231045		1
Q8NI36	WDR36_HUMAN	WD repeat-containing protein 36 (T-cell activation WD repeat-containing protein, TA-WDRP)	WDR36	1.20515	0.689146	1.15495	1.21183	1.19186	1.12097	0.397494		1
Q13620	CUL4B_HUMAN	Cullin-4B, CUL-4B	CUL4B KIAA0695	1.19321	0.694276	1.17657	1.06989	0.967295	1.1647	0.160624		1
Q86VI3	IQGA3_HUMAN	Ras GTPase-activating-like protein IQGAP3	IQGAP3	1.19763	0.888759	1.2913	1.04648	1.05619	1.19102	0.230337		1
Q15436	SC23A_HUMAN	Protein transport protein Sec23A, hSec23A (SEC23-related protein A)	SEC23A	1.05059	0.534716	1.10614	0.987096	0.990916	1.02905	0.00580004		1
Q7Z3B4	NUP54_HUMAN	Nucleoporin p54 (54 kDa nucleoporin)	NUP54	1.77706	0.917607	1.23852	1.27797	1.17032	1.06899	0.392322		1
Q8N766	EMC1_HUMAN	ER membrane protein complex subunit 1	EMC1 KIAA0090 PSEC0263	1.24352	0.855845	1.0517	1.05541	0.897993	0.983503	-0.0524229		1
Q9Y2X3	NOP58_HUMAN	Nucleolar protein 58 (Nucleolar protein 5)	NOP58 NOL5 NOP5 HSPC120	1.1378	0.784742	1.09836	1.25901	1.19146	1.02161	0.360429		1
Q02818	NUCB1_HUMAN	Nucleobindin-1 (CALNUC)	NUCB1 NUC	1.65969	0.979387	1.80152	1.11943	0.844453	1.07114	0.0286245		1
Q13561	DCTN2_HUMAN	Dynactin subunit 2 (50 kDa dynein-associated polypeptide) (Dynactin complex 50 kDa subunit, DCTN-50) (p50 dynamitin)	DCTN2 DCTN50	1.61418	0.694973	1.46568	0.88519	0.725071	1.08602	-0.263251		1
P31350	RIR2_HUMAN	Ribonucleoside-diphosphate reductase subunit M2, EC 1.17.4.1 (Ribonucleotide reductase small chain) (Ribonucleotide reductase small subunit)	RRM2 RR2	1.17158	0.477088	1.34538	0.997578	0.792852	1.03553	-0.147399		1
Q9NZV1	CRIM1_HUMAN	Cysteine-rich motor neuron 1 protein, CRIM-1 (Cysteine-rich repeat-containing protein S52) [Cleaved into: Processed cysteine-rich motor neuron 1 protein ]	CRIM1 S52 UNQ1886/PRO4330	1.30116	0.801041	1.6997	1.62601	1.04424	1.24875	0.659059		1
P19022	CADH2_HUMAN	Cadherin-2 (CDw325) (Neural cadherin, N-cadherin) (CD antigen CD325)	CDH2 CDHN NCAD	1.66841	0.984148	1.55947	1.27433	1.30977	1.1623	0.547974		1
Q9BZJ0	CRNL1_HUMAN	Crooked neck-like protein 1 (Crooked neck homolog, hCrn)	CRNKL1 CRN CGI-201 MSTP021	1.12795	0.987428	1.41504	1.0726	1.00008	1.06757	0.112688		1
Q7L2H7	EIF3M_HUMAN	Eukaryotic translation initiation factor 3 subunit M, eIF3m (Fetal lung protein B5, hFL-B5) (PCI domain-containing protein 1)	EIF3M HFLB5 PCID1 GA17 PNAS-125	1.3704	0.789001	1.22186	0.94264	0.913843	1.04479	-0.082529		1
P04899	GNAI2_HUMAN	Guanine nucleotide-binding protein G(i) subunit alpha-2 (Adenylate cyclase-inhibiting G alpha protein)	GNAI2 GNAI2B	1.13811	0.163769	1.0447	1.28511	1.09011	1.26934	0.479998		1
Q9NY93	DDX56_HUMAN	Probable ATP-dependent RNA helicase DDX56, EC 3.6.4.13 (ATP-dependent 61 kDa nucleolar RNA helicase) (DEAD box protein 21) (DEAD box protein 56)	DDX56 DDX21 NOH61	1.26507	0.891399	1.40166	0.979536	0.963384	1.04128	-0.0130245		1
O00391	QSOX1_HUMAN	Sulfhydryl oxidase 1, hQSOX, EC 1.8.3.2 (Quiescin Q6)	QSOX1 QSCN6 UNQ2520/PRO6013	1.43724	0.464002	1.07699	1.27838	1.22916	1.27668	0.572742		1
P51812	KS6A3_HUMAN	Ribosomal protein S6 kinase alpha-3, S6K-alpha-3, EC 2.7.11.1 (90 kDa ribosomal protein S6 kinase 3, p90-RSK 3, p90RSK3) (Insulin-stimulated protein kinase 1, ISPK-1) (MAP kinase-activated protein kinase 1b, MAPK-activated protein kinase 1b, MAPKAP kinase 1b, MAPKAPK-1b) (Ribosomal S6 kinase 2, RSK-2) (pp90RSK2)	RPS6KA3 ISPK1 MAPKAPK1B RSK2	1.16398	0.769616	1.37119	0.994082	0.946653	0.901015	-0.133655		1
P46977	STT3A_HUMAN	Dolichyl-diphosphooligosaccharide--protein glycosyltransferase subunit STT3A, Oligosaccharyl transferase subunit STT3A, STT3-A, EC 2.4.99.18 (B5) (Integral membrane protein 1) (Transmembrane protein TMC)	STT3A ITM1 TMC	1.63045	0.82952	1.23721	1.2833	0.946306	1.29901	0.400262		1
Q14320	FA50A_HUMAN	Protein FAM50A (Protein HXC-26) (Protein XAP-5)	FAM50A DXS9928E HXC26 XAP5	1.42426	0.827477	1.18864	0.983469	0.827847	1.02515	-0.138248		1
Q9UNS2	CSN3_HUMAN	COP9 signalosome complex subunit 3, SGN3, Signalosome subunit 3 (JAB1-containing signalosome subunit 3)	COPS3 CSN3	2.45417	0.936783	1.71314	1.17736	1.14782	0.828608	0.123299		1
Q9UH99	SUN2_HUMAN	SUN domain-containing protein 2 (Protein unc-84 homolog B) (Rab5-interacting protein, Rab5IP) (Sad1/unc-84 protein-like 2)	SUN2 FRIGG KIAA0668 RAB5IP UNC84B	1.5175	0.895259	1.62386	1.21245	1.31096	1.20199	0.534104		1
Q08043	ACTN3_HUMAN	Alpha-actinin-3 (Alpha-actinin skeletal muscle isoform 3) (F-actin cross-linking protein)	ACTN3	1.9742		1.34754	1.40922		1.24709	0.699918		1
Q9BXS5	AP1M1_HUMAN	AP-1 complex subunit mu-1 (AP-mu chain family member mu1A) (Adaptor protein complex AP-1 subunit mu-1) (Adaptor-related protein complex 1 subunit mu-1) (Clathrin assembly protein complex 1 mu-1 medium chain 1) (Clathrin coat assembly protein AP47) (Clathrin coat-associated protein AP47) (Golgi adaptor HA1/AP1 adaptin mu-1 subunit) (Mu-adaptin 1) (Mu1A-adaptin)	AP1M1 CLTNM	1.44087	0.384086	1.59246	0.983119	0.76296	0.983746	-0.232757		1
Q15019	SEPT2_HUMAN	Septin-2 (Neural precursor cell expressed developmentally down-regulated protein 5, NEDD-5)	SEPTIN2 DIFF6 KIAA0158 NEDD5 SEPT2	1.07128	0.903044	1.50623	0.978288	1.07255	1.18769	0.188687		1
Q15738	NSDHL_HUMAN	Sterol-4-alpha-carboxylate 3-dehydrogenase, decarboxylating, EC 1.1.1.170 (Protein H105e3)	NSDHL H105E3	1.26474	0.742127	1.6863	1.04675	0.901863	0.921114	-0.109491		1
P24941	CDK2_HUMAN	Cyclin-dependent kinase 2, EC 2.7.11.22 (Cell division protein kinase 2) (p33 protein kinase)	CDK2 CDKN2	1.74871	0.59136	1.29467	0.956411	0.831428	0.977406	-0.200962		1
Q13492	PICAL_HUMAN	Phosphatidylinositol-binding clathrin assembly protein (Clathrin assembly lymphoid myeloid leukemia protein)	PICALM CALM	1.21516	-0.168116	1.19525	1.04931	0.832343	1.00722	-0.0930913		1
Q5SWX8	ODR4_HUMAN	Protein odr-4 homolog, hODR-4 (LAG1-interacting protein) (Transactivated by transforming growth factor beta protein 1)	ODR4 C1orf27 TTG1 TTG1A	1.15644	0.609851	1.08188	1.13181	1.04747	1.05006	0.181681		1
Q86U38	NOP9_HUMAN	Nucleolar protein 9	NOP9 C14orf21 KIAA2021	1.3163	0.489396	1.35813	0.996071	0.757761	0.844381	-0.354625		1
Q9Y6I9	TX264_HUMAN	Testis-expressed protein 264 (Putative secreted protein Zsig11)	TEX264 ZSIG11 UNQ337/PRO536	1.79892	0.991062	1.87177	1.23358	0.934151	1.11182	0.219731		1
Q14165	MLEC_HUMAN	Malectin	MLEC KIAA0152	1.98254	0.594227	1.00898	1.02794	0.769921	0.937652	-0.227625		1
P39656	OST48_HUMAN	Dolichyl-diphosphooligosaccharide--protein glycosyltransferase 48 kDa subunit, DDOST 48 kDa subunit, Oligosaccharyl transferase 48 kDa subunit	DDOST KIAA0115 OST48 OK/SW-cl.45	1.52972	0.885538	1.5765	1.42611	0.936338	1.06907	0.331447		1
P16070	CD44_HUMAN	CD44 antigen (CDw44) (Epican) (Extracellular matrix receptor III, ECMR-III) (GP90 lymphocyte homing/adhesion receptor) (HUTCH-I) (Heparan sulfate proteoglycan) (Hermes antigen) (Hyaluronate receptor) (Phagocytic glycoprotein 1, PGP-1) (Phagocytic glycoprotein I, PGP-I) (CD antigen CD44)	CD44 LHR MDU2 MDU3 MIC4	1.44259	0.495269	1.83953	1.0891	0.922726	0.984912	-0.0026818		1
P61204	ARF3_HUMAN	ADP-ribosylation factor 3	ARF3	1.36647	0.91249	1.00894	1.00806	0.705348	1.17444	-0.0939683		1
P24468	COT2_HUMAN	COUP transcription factor 2, COUP-TF2 (Apolipoprotein A-I regulatory protein 1, ARP-1) (COUP transcription factor II, COUP-TF II) (Nuclear receptor subfamily 2 group F member 2)	NR2F2 ARP1 TFCOUP2	1.61009	0.707446	1.01841	1.15755	0.953361	0.778364	-0.0927493		1
Q9NUQ7	UFSP2_HUMAN	Ufm1-specific protease 2, UfSP2, EC 3.4.22.-	UFSP2 C4orf20	1.41167	0.676911	1.66546	0.914033	0.827817	0.93564	-0.280499		1
P51688	SPHM_HUMAN	N-sulphoglucosamine sulphohydrolase, EC 3.10.1.1 (Sulfoglucosamine sulfamidase) (Sulphamidase)	SGSH HSS	1.28832	0.949295	1.52102	1.36214	1.30283	1.18547	0.615525		1
P50748	KNTC1_HUMAN	Kinetochore-associated protein 1 (Rough deal homolog, HsROD, Rod, hRod)	KNTC1 KIAA0166	1.57578	0.206523	1.12207	1.02072	0.71743	0.803623	-0.408791		1
P61916	NPC2_HUMAN	NPC intracellular cholesterol transporter 2 (Epididymal secretory protein E1) (Human epididymis-specific protein 1, He1) (Niemann-Pick disease type C2 protein)	NPC2 HE1	1.87081	0.350843	1.76372	1.01681	1.2056	1.05575	0.218692		1
Q9NQC3	RTN4_HUMAN	Reticulon-4 (Foocen) (Neurite outgrowth inhibitor, Nogo protein) (Neuroendocrine-specific protein, NSP) (Neuroendocrine-specific protein C homolog) (RTN-x) (Reticulon-5)	RTN4 KIAA0886 NOGO My043 SP1507	1.01029	0.393866	2.03529	1.26317	0.710681	1.22296	0.156713		1
Q99653	CHP1_HUMAN	Calcineurin B homologous protein 1 (Calcineurin B-like protein) (Calcium-binding protein CHP) (Calcium-binding protein p22) (EF-hand calcium-binding domain-containing protein p22)	CHP1 CHP	1.31249	0.712699	1.06072	1.0198	0.96523	1.05023	0.0288178		1
O15160	RPAC1_HUMAN	DNA-directed RNA polymerases I and III subunit RPAC1, DNA-directed RNA polymerase I subunit C, RNA polymerases I and III subunit AC1 (AC40) (DNA-directed RNA polymerases I and III 40 kDa polypeptide, RPA40) (RPA39) (RPC40)	POLR1C POLR1E	1.27768	0.66755	1.1916	0.967518	1.01907	0.991999	-0.0176665		1
Q15631	TSN_HUMAN	Translin, EC 3.1.-.- (Component 3 of promoter of RISC, C3PO)	TSN	1.4607	0.889756	1.69927	0.963717	0.609408	0.857116	-0.519457		1
P18074	ERCC2_HUMAN	General transcription and DNA repair factor IIH helicase subunit XPD, TFIIH subunit XPD, EC 3.6.4.12 (Basic transcription factor 2 80 kDa subunit, BTF2 p80) (CXPD) (DNA excision repair protein ERCC-2) (DNA repair protein complementing XP-D cells) (TFIIH basal transcription factor complex 80 kDa subunit, TFIIH 80 kDa subunit, TFIIH p80) (Xeroderma pigmentosum group D-complementing protein)	ERCC2 XPD XPDC	1.38745	0.853169	1.01643	1.23011	0.876226	1.1484	0.201002		1
Q8TCT9	HM13_HUMAN	Minor histocompatibility antigen H13, EC 3.4.23.- (Intramembrane protease 1, IMP-1, IMPAS-1, hIMP1) (Presenilin-like protein 3) (Signal peptide peptidase)	HM13 H13 IMP1 PSL3 SPP MSTP086	1.33319	0.877166	1.3593	1.17053	0.958466	1.14254	0.213704		1
Q6UW02	CP20A_HUMAN	Cytochrome P450 20A1, EC 1.14.-.-	CYP20A1 UNQ667/PRO1301	1.9194	0.472169	1.90622	1.02938	0.83174	1.07045	-0.0569096		1
Q15904	VAS1_HUMAN	V-type proton ATPase subunit S1, V-ATPase subunit S1 (Protein XAP-3) (V-ATPase Ac45 subunit) (V-ATPase S1 accessory protein) (Vacuolar proton pump subunit S1)	ATP6AP1 ATP6IP1 ATP6S1 VATPS1 XAP3	2.38064		1.90393	0.978063		0.949355	-0.0911694		1
P11279	LAMP1_HUMAN	Lysosome-associated membrane glycoprotein 1, LAMP-1, Lysosome-associated membrane protein 1 (CD107 antigen-like family member A) (CD antigen CD107a)	LAMP1	1.86906	0.844766	1.83599	1.48697	1.25682	1.47417	0.84037		1
Q71UI9	H2AV_HUMAN	Histone H2A.V (H2A.F/Z) (H2A.Z variant histone 2)	H2AZ2 H2AFV H2AV	1.25437		1.38574	0.87809		1.02277	-0.125388		1
Q6P9B6	MEAK7_HUMAN	MTOR-associated protein MEAK7, MEAK7 (MTOR associated protein, eak-7 homolog) (TBC/LysM-associated domain-containing protein 1) (TLD domain-containing protein 1)	MEAK7 KIAA1609 TLDC1	2.25323	0.856424	1.14856	1.09228	0.979118	0.819564	-0.0913137		1
O75190	DNJB6_HUMAN	DnaJ homolog subfamily B member 6 (HHDJ1) (Heat shock protein J2, HSJ-2) (MRJ) (MSJ-1)	DNAJB6 HSJ2 MRJ MSJ1	1.4096	0.671772	1.69813	0.952277	0.846166	0.866851	-0.291759		1
Q8WVQ1	CANT1_HUMAN	Soluble calcium-activated nucleotidase 1, SCAN-1, EC 3.6.1.6 (Apyrase homolog) (Putative MAPK-activating protein PM09) (Putative NF-kappa-B-activating protein 107)	CANT1 SHAPY	1.0715	0.122154	1.06967	1.06791	0.837361	0.964852	-0.109149		1
Q9NSI2	SLX9_HUMAN	Ribosome biogenesis protein SLX9 homolog	SLX9 C21orf70 FAM207A PRED56	1.001	0.525989	1.50136	0.776322	0.931809	1.31584	0.0196323		1
Q9P0L0	VAPA_HUMAN	Vesicle-associated membrane protein-associated protein A, VAMP-A, VAMP-associated protein A, VAP-A (33 kDa VAMP-associated protein, VAP-33)	VAPA VAP33	1.52575	0.208538	1.36679	1.37511	0.933263	0.851078	0.127717		1
Q99805	TM9S2_HUMAN	Transmembrane 9 superfamily member 2 (p76)	TM9SF2	1.75095	0.6087	1.04459	1.42816	1.00344	1.23454	0.494558		1
Q9NVJ2	ARL8B_HUMAN	ADP-ribosylation factor-like protein 8B, EC 3.6.5.2 (ADP-ribosylation factor-like protein 10C) (Novel small G protein indispensable for equal chromosome segregation 1)	ARL8B ARL10C GIE1	2.53974		1.42871	1.3037	1.05892	1.17056	0.403457		1
O00505	IMA4_HUMAN	Importin subunit alpha-4 (Importin alpha Q2, Qip2) (Karyopherin subunit alpha-3) (SRP1-gamma)	KPNA3 QIP2	1.66693	0.880721	1.35912	1.07038	0.789822	0.982193	-0.133091		1
Q6PCB7	S27A1_HUMAN	Long-chain fatty acid transport protein 1, FATP-1, Fatty acid transport protein 1, EC 6.2.1.15 (Solute carrier family 27 member 1)	SLC27A1 ACSVL5 FATP1	1.08591	0.821365	1.3201	1.14395	0.983142	1.15789	0.223809		1
Q9BZF1	OSBL8_HUMAN	Oxysterol-binding protein-related protein 8, ORP-8, OSBP-related protein 8	OSBPL8 KIAA1451 ORP8 OSBP10	1.69614	0.468526	1.09642	1.03989	0.945757	1.10293	0.0717642		1
Q9HD45	TM9S3_HUMAN	Transmembrane 9 superfamily member 3 (EP70-P-iso) (SM-11044-binding protein)	TM9SF3 SMBP UNQ245/PRO282	1.34796	0.85203	1.28683	1.39962	0.994681	1.34453	0.542986		1
Q7Z4G4	TRM11_HUMAN	tRNA (guanine(10)-N2)-methyltransferase homolog, EC 2.1.1.- (tRNA guanosine-2'-O-methyltransferase TRM11 homolog)	TRMT11 C6orf75 MDS024	2.35213		1.50738	0.908208		1.25238	0.190483		1
Q9HB90	RRAGC_HUMAN	Ras-related GTP-binding protein C, Rag C, RagC, EC 3.6.5.- (GTPase-interacting protein 2) (TIB929)	RRAGC	2.47048		1.69075	1.40101		1.05561	0.507176		1
P28676	GRAN_HUMAN	Grancalcin	GCA GCL	1.01224	0.223939	1.63482	0.911719	0.993472	1.12506	0.0247456		1
P37268	FDFT_HUMAN	Squalene synthase, SQS, SS, EC 2.5.1.21 (FPP:FPP farnesyltransferase) (Farnesyl-diphosphate farnesyltransferase) (Farnesyl-diphosphate farnesyltransferase 1)	FDFT1	2.01867	0.446745	1.65159	0.768645	0.787056	0.717559	-0.684146		1
Q9BRT9	SLD5_HUMAN	DNA replication complex GINS protein SLD5 (GINS complex subunit 4) [Cleaved into: DNA replication complex GINS protein SLD5, N-terminally processed ]	GINS4 SLD5	1.16362	0.880268	1.28541	0.874196	0.748609	0.983941	-0.346539		1
Q96QU8	XPO6_HUMAN	Exportin-6, Exp6 (Ran-binding protein 20)	XPO6 KIAA0370 RANBP20	1.51997	0.727434	1.12936	1.09068	0.757691	0.869742	-0.243359		1
P67812	SC11A_HUMAN	Signal peptidase complex catalytic subunit SEC11A, EC 3.4.21.89 (Endopeptidase SP18) (Microsomal signal peptidase 18 kDa subunit, SPase 18 kDa subunit) (SEC11 homolog A) (SEC11-like protein 1) (SPC18)	SEC11A SEC11L1 SPC18 SPCS4A	2.45171	0.66576	1.55983	0.852721	0.79978	0.915669	-0.38331		1
P51571	SSRD_HUMAN	Translocon-associated protein subunit delta, TRAP-delta (Signal sequence receptor subunit delta, SSR-delta)	SSR4 TRAPD	3.42998		1.26952	1.16308	0.747765	0.846208	-0.208279		1
Q9UBM7	DHCR7_HUMAN	7-dehydrocholesterol reductase, 7-DHC reductase, EC 1.3.1.21 (Delta7-sterol reductase) (Sterol Delta(7)-reductase) (Sterol reductase SR-2)	DHCR7 D7SR	1.00866	0.887919	1.83932	1.26938	0.886954	1.37806	0.404305		1
P35052	GPC1_HUMAN	Glypican-1 [Cleaved into: Secreted glypican-1 ]	GPC1	1.33242		1.11058	1.19018		1.28785	0.528569		1
O15427	MOT4_HUMAN	Monocarboxylate transporter 4, MCT 4 (Solute carrier family 16 member 3)	SLC16A3 MCT4	1.15438	0.972366	1.3931	1.39377	1.03274	1.43837	0.624767		1
Q16394	EXT1_HUMAN	Exostosin-1, EC 2.4.1.224, EC 2.4.1.225 (Glucuronosyl-N-acetylglucosaminyl-proteoglycan/N-acetylglucosaminyl-proteoglycan 4-alpha-N-acetylglucosaminyltransferase) (Multiple exostoses protein 1) (Putative tumor suppressor protein EXT1)	EXT1	1.23357	0.754208	1.09394	1.19547	1.03807	1.16734	0.309332		1
Q8TED1	GPX8_HUMAN	Probable glutathione peroxidase 8, GPx-8, GSHPx-8, EC 1.11.1.9	GPX8 UNQ847/PRO1785	1.07442		1.27667	1.33716	1.43067	1.00823	0.56742		1
Q86YB8	ERO1B_HUMAN	ERO1-like protein beta, ERO1-L-beta, EC 1.8.4.- (Endoplasmic reticulum oxidoreductase beta) (Endoplasmic reticulum oxidoreductin-1-like protein B) (Oxidoreductin-1-L-beta)	ERO1B ERO1LB	1.1393		2.04207	0.847374		0.983564	-0.217821		1
Q6ZT21	TMPPE_HUMAN	Transmembrane protein with metallophosphoesterase domain, EC 3.1.-.-	TMPPE	1.41941		1.05203	1.14708		1.10368	0.291313		1
Q9H0W8	SMG9_HUMAN	Nonsense-mediated mRNA decay factor SMG9	SMG9 C19orf61	1.14018		1.3102	0.857181		0.972431	-0.219608		1
Q9GZP9	DERL2_HUMAN	Derlin-2 (Degradation in endoplasmic reticulum protein 2, DERtrin-2) (Der1-like protein 2) (F-LAN-1) (F-LANa)	DERL2 DER2 FLANA CGI-101 SBBI53	2.02835	0.563792	1.19682	1.47894	0.870319	1.23452	0.438524		1
Q96S97	MYADM_HUMAN	Myeloid-associated differentiation marker (Protein SB135)	MYADM UNQ553/PRO1110	1.05147		1.07304	1.75308		1.58175	1.26096		1
O75915	PRAF3_HUMAN	PRA1 family protein 3 (ADP-ribosylation factor-like protein 6-interacting protein 5, ARL-6-interacting protein 5, Aip-5) (Cytoskeleton-related vitamin A-responsive protein) (Dermal papilla-derived protein 11) (GTRAP3-18) (Glutamate transporter EAAC1-interacting protein) (JM5) (Prenylated Rab acceptor protein 2) (Protein JWa) (Putative MAPK-activating protein PM27)	ARL6IP5 DERP11 JWA PRA2 PRAF3 HSPC127	1.69861		1.8218	1.19648		1.05344	0.290408		1
Q9BVC6	TM109_HUMAN	Transmembrane protein 109 (Mitsugumin-23, Mg23)	TMEM109	2.97541		2.49556	1.06315	0.623867	0.843265	-0.419963		1
Q6UXD5	SE6L2_HUMAN	Seizure 6-like protein 2	SEZ6L2 PSK UNQ1903/PRO4349	1.22277		1.29929	1.22854		1.15586	0.433578		1
P04114	APOB_HUMAN	Apolipoprotein B-100, Apo B-100 [Cleaved into: Apolipoprotein B-48, Apo B-48 ]	APOB	2.7496		1.45107	1.0391	1.17209	1.08467	0.231961		1
Q6P9B9	INT5_HUMAN	Integrator complex subunit 5, Int5	INTS5 KIAA1698	1.69665	0.804677	1.40744	1.25793	1.12401	1.24563	0.468475		1
P30046	DOPD_HUMAN	D-dopachrome decarboxylase, EC 4.1.1.84 (D-dopachrome tautomerase) (Phenylpyruvate tautomerase II)	DDT	3.00379		1.77877	0.974477	1.1338	1.00802	0.0938002		1
Q8NBJ7	SUMF2_HUMAN	Inactive C-alpha-formylglycine-generating enzyme 2 (Paralog of formylglycine-generating enzyme, pFGE) (Sulfatase-modifying factor 2)	SUMF2 PSEC0171 UNQ1968/PRO4500	1.50756	0.945372	1.51787	0.968279	0.814504	0.886918	-0.287683		1
P01033	TIMP1_HUMAN	Metalloproteinase inhibitor 1 (Erythroid-potentiating activity, EPA) (Fibroblast collagenase inhibitor, Collagenase inhibitor) (Tissue inhibitor of metalloproteinases 1, TIMP-1)	TIMP1 CLGI TIMP	1.54025		1.08259	0.85535		0.694259	-0.629264		1
Q9UBV7	B4GT7_HUMAN	Beta-1,4-galactosyltransferase 7, Beta-1,4-GalTase 7, Beta4Gal-T7, b4Gal-T7, EC 2.4.1.- (Proteoglycan UDP-galactose:beta-xylose beta1,4-galactosyltransferase I) (UDP-Gal:beta-GlcNAc beta-1,4-galactosyltransferase 7) (UDP-galactose:beta-N-acetylglucosamine beta-1,4-galactosyltransferase 7) (UDP-galactose:beta-xylose beta-1,4-galactosyltransferase) (XGPT) (XGalT-1) (Xylosylprotein 4-beta-galactosyl…	B4GALT7 XGALT1 UNQ748/PRO1478	1.45002	0.937559	1.24201	1.27383	1.06146	1.11597	0.345597		1
Q9BQA9	CYBC1_HUMAN	Cytochrome b-245 chaperone 1 (Essential for reactive oxygen species protein, Eros)	CYBC1 C17orf62 EROS	1.47799		1.43922	1.0255		0.756546	-0.284581		1
Q9Y639	NPTN_HUMAN	Neuroplastin (Stromal cell-derived receptor 1, SDR-1)	NPTN SDFR1 SDR1	1.72676		1.22518	0.909499		0.865957	-0.293711		1
P61421	VA0D1_HUMAN	V-type proton ATPase subunit d 1, V-ATPase subunit d 1 (32 kDa accessory protein) (V-ATPase 40 kDa accessory protein) (V-ATPase AC39 subunit, p39) (Vacuolar proton pump subunit d 1)	ATP6V0D1 ATP6D VPATPD	2.38944	0.633972	2.22944	1.44084	0.83151	1.33551	0.455043		1
P08962	CD63_HUMAN	CD63 antigen (Granulophysin) (Lysosomal-associated membrane protein 3, LAMP-3) (Lysosome integral membrane protein 1, Limp1) (Melanoma-associated antigen ME491) (OMA81H) (Ocular melanoma-associated antigen) (Tetraspanin-30, Tspan-30) (CD antigen CD63)	CD63 MLA1 TSPAN30	1.69226		1.44313	1.42551		1.42954	0.877866		1
P04066	FUCO_HUMAN	Tissue alpha-L-fucosidase, EC 3.2.1.51 (Alpha-L-fucosidase I) (Alpha-L-fucoside fucohydrolase 1, Alpha-L-fucosidase 1)	FUCA1 Nbla10230	1.33314	0.784561	1.12128	1.4233	1.42623	1.23065	0.758463		1
Q96JB5	CK5P3_HUMAN	CDK5 regulatory subunit-associated protein 3 (CDK5 activator-binding protein C53) (LXXLL/leucine-zipper-containing ARF-binding protein) (Protein HSF-27)	CDK5RAP3 IC53 LZAP MSTP016 OK/SW-cl.114 PP1553	1.11911	0.891523	1.36485	0.92833	0.895319	0.996587	-0.152397		1
Q9BZR6	RTN4R_HUMAN	Reticulon-4 receptor (Nogo receptor, NgR) (Nogo-66 receptor)	RTN4R NOGOR UNQ330/PRO526	1.69451		1.48286	1.3263		1.13706	0.513924		1
Q8IZ81	ELMD2_HUMAN	ELMO domain-containing protein 2	ELMOD2	2.41278		2.19073	0.864964	0.927737	1.13153	-0.0630911		1
Q8N1F7	NUP93_HUMAN	Nuclear pore complex protein Nup93 (93 kDa nucleoporin) (Nucleoporin Nup93)	NUP93 KIAA0095	0.910062	1.14256	1.12438	0.991533	1.10147	1.06559	0.127053		1
Q07065	CKAP4_HUMAN	Cytoskeleton-associated protein 4 (63-kDa cytoskeleton-linking membrane protein, Climp-63, p63)	CKAP4	0.861903	1.53213	1.18497	1.20245	1.0575	1.10164	0.280668		1
P06756	ITAV_HUMAN	Integrin alpha-V (Vitronectin receptor) (Vitronectin receptor subunit alpha) (CD antigen CD51) [Cleaved into: Integrin alpha-V heavy chain; Integrin alpha-V light chain ]	ITGAV MSK8 VNRA VTNR	0.883832	1.29301	1.30088	1.22163	1.142	1.02796	0.302577		1
P78346	RPP30_HUMAN	Ribonuclease P protein subunit p30, RNaseP protein p30 (RNase P subunit 2)	RPP30 RNASEP2	0.726667	1.05071	1.24274	0.977768	0.961764	0.923103	-0.115595		1
P43121	MUC18_HUMAN	Cell surface glycoprotein MUC18 (Cell surface glycoprotein P1H12) (Melanoma cell adhesion molecule) (Melanoma-associated antigen A32) (Melanoma-associated antigen MUC18) (S-endo 1 endothelial-associated antigen) (CD antigen CD146)	MCAM MUC18	0.657147	1.68906	1.0342	1.11693	1.2607	1.18477	0.423764		1
Q96DZ1	ERLEC_HUMAN	Endoplasmic reticulum lectin 1 (ER lectin, Erlectin) (XTP3-transactivated gene B protein)	ERLEC1 C2orf30 XTP3TPB UNQ1878/PRO4321	0.823386	1.07376	1.1152	1.0079	0.962421	0.958804	-0.0589699		1
P62906	RL10A_HUMAN	60S ribosomal protein L10a (CSA-19) (Large ribosomal subunit protein uL1) (Neural precursor cell expressed developmentally down-regulated protein 6, NEDD-6)	RPL10A NEDD6	0.519968	1.30085	1.0353	0.765438	0.832794	0.867284	-0.483917		1
Q9UHI8	ATS1_HUMAN	A disintegrin and metalloproteinase with thrombospondin motifs 1, ADAM-TS 1, ADAM-TS1, ADAMTS-1, EC 3.4.24.- (METH-1)	ADAMTS1 KIAA1346 METH1	0.926157	1.24502	1.42841	1.28113	1.09707	1.2059	0.438745		1
P51665	PSMD7_HUMAN	26S proteasome non-ATPase regulatory subunit 7 (26S proteasome regulatory subunit RPN8) (26S proteasome regulatory subunit S12) (Mov34 protein homolog) (Proteasome subunit p40)	PSMD7 MOV34L	0.978329	1.09791	1.56902	1.03905	1.04461	1.14771	0.18323		1
Q9UBV2	SE1L1_HUMAN	Protein sel-1 homolog 1 (Suppressor of lin-12-like protein 1, Sel-1L)	SEL1L TSA305 UNQ128/PRO1063	0.983023	1.05705	1.01585	1.0855	1.17601	1.05006	0.243705		1
O75477	ERLN1_HUMAN	Erlin-1 (Endoplasmic reticulum lipid raft-associated protein 1) (Protein KE04) (Stomatin-prohibitin-flotillin-HflC/K domain-containing protein 1, SPFH domain-containing protein 1)	ERLIN1 C10orf69 KE04 KEO4 SPFH1	0.854353	1.3385	1.137	1.05059	1.0343	1.07739	0.129932		1
Q9Y657	SPIN1_HUMAN	Spindlin-1 (Ovarian cancer-related protein) (Spindlin1)	SPIN1 OCR SPIN	0.795842	1.22373	1.00084	1.12212	0.821609	0.910208	-0.123102		1
Q9UIQ6	LCAP_HUMAN	Leucyl-cystinyl aminopeptidase, Cystinyl aminopeptidase, EC 3.4.11.3 (Insulin-regulated membrane aminopeptidase) (Insulin-responsive aminopeptidase, IRAP) (Oxytocinase, OTase) (Placental leucine aminopeptidase, P-LAP) [Cleaved into: Leucyl-cystinyl aminopeptidase, pregnancy serum form ]	LNPEP OTASE	0.838142	1.55455	1.3808	1.23521	1.15529	1.19239	0.437911		1
Q9BSD7	NTPCR_HUMAN	Cancer-related nucleoside-triphosphatase, NTPase, EC 3.6.1.15 (Nucleoside triphosphate phosphohydrolase)	NTPCR C1orf57	0.834764	1.64023	1.26401	1.02046	1.07878	1.28612	0.298053		1
Q96S52	PIGS_HUMAN	GPI transamidase component PIG-S (Phosphatidylinositol-glycan biosynthesis class S protein)	PIGS UNQ1873/PRO4316	0.871034	1.49485	1.52311	1.16755	1.10393	1.10939	0.294782		1
Q9H0U3	MAGT1_HUMAN	Magnesium transporter protein 1, MagT1 (Dolichyl-diphosphooligosaccharide--protein glycosyltransferase subunit MAGT1, Oligosaccharyl transferase subunit MAGT1) (Implantation-associated protein, IAP)	MAGT1 IAG2 PSEC0084 UNQ628/PRO1244		1.30519	1.29891	1.27323	0.74781	1.15654	0.141832		1
Q93077	H2A1C_HUMAN	Histone H2A type 1-C (H2A-clustered histone 6) (Histone H2A/l)	H2AC6 H2AFL HIST1H2AC	0.823849	2.07382	1.38574	1.05526	0.942485	1.02277	0.0168118		1
Q9NUP9	LIN7C_HUMAN	Protein lin-7 homolog C, Lin-7C (Mammalian lin-seven protein 3, MALS-3) (Vertebrate lin-7 homolog 3, Veli-3)	LIN7C MALS3 VELI3	0.784436	1.56495	1.22257	0.8808	1.00596	1.01093	-0.0855741		1
Q9Y6B6	SAR1B_HUMAN	GTP-binding protein SAR1b (GTP-binding protein B, GTBPB)	SAR1B SARA2 SARB		1.17853	1.5552		0.724641	1.07457	-0.260933		1
Q9NX08	COMD8_HUMAN	COMM domain-containing protein 8	COMMD8 MDS022		1.85871	1.1264	0.848285	0.915769	0.952561	-0.24472		1
Q9NR31	SAR1A_HUMAN	GTP-binding protein SAR1a (COPII-associated small GTPase)	SAR1A SAR1 SARA SARA1	0.71473	1.32923	2.29734	0.924676	0.723695	0.92618	-0.377189		1
Q96J84	KIRR1_HUMAN	Kin of IRRE-like protein 1 (Kin of irregular chiasm-like protein 1) (Nephrin-like protein 1)	KIRREL1 KIRREL NEPH1	0.703583	1.38516	1.54187	0.936835	0.8297	0.914827	-0.276935		1
Q8NFH4	NUP37_HUMAN	Nucleoporin Nup37, p37 (Nup107-160 subcomplex subunit Nup37)	NUP37	0.873283	1.50727	1.26399	0.944036	1.22749	1.06306	0.185684		1
P22670	RFX1_HUMAN	MHC class II regulatory factor RFX1 (Enhancer factor C, EF-C) (Regulatory factor X 1, RFX) (Transcription factor RFX1)	RFX1	0.756519	1.09796	1.41955	1.14348	0.864724	0.943054	-0.0404003		1
Q9Y3B3	TMED7_HUMAN	Transmembrane emp24 domain-containing protein 7 (p24 family protein gamma-3, p24gamma3) (p27)	TMED7 CGI-109	0.889485	1.4658	1.17103	1.19281	0.963494	1.00172	0.126607		1
P11234	RALB_HUMAN	Ras-related protein Ral-B, EC 3.6.5.2	RALB		1.51857	1.44211		0.919177	1.23365	0.181606		1
Q5T2T1	MPP7_HUMAN	MAGUK p55 subfamily member 7	MPP7		1.17823	1.14333		1.01791	0.977827	-0.00526176		1
Q15286	RAB35_HUMAN	Ras-related protein Rab-35 (GTP-binding protein RAY) (Ras-related protein Rab-1C)	RAB35 RAB1C RAY		1.13384	1.67924	1.07968	0.825513	1.11309	0.0149904		1
Q70UQ0	IKIP_HUMAN	Inhibitor of nuclear factor kappa-B kinase-interacting protein, I kappa-B kinase-interacting protein, IKBKB-interacting protein, IKK-interacting protein	IKBIP IKIP	0.807483	1.3086	1.09791	1.00658	1.13405	1.09374	0.185525		1
Q9UBG0	MRC2_HUMAN	C-type mannose receptor 2 (C-type lectin domain family 13 member E) (Endocytic receptor 180) (Macrophage mannose receptor 2) (Urokinase-type plasminogen activator receptor-associated protein, UPAR-associated protein, Urokinase receptor-associated protein) (CD antigen CD280)	MRC2 CLEC13E ENDO180 KIAA0709 UPARAP	0.667122	1.49411	1.10655	1.17328	1.01125	1.17003	0.275508		1
P28072	PSB6_HUMAN	Proteasome subunit beta type-6, EC 3.4.25.1 (Macropain delta chain) (Multicatalytic endopeptidase complex delta chain) (Proteasome delta chain) (Proteasome subunit Y)	PSMB6 LMPY Y	0.97026	1.14838	1.5449	1.01146	1.1358	1.28518	0.332115		1
Q9Y5K8	VATD_HUMAN	V-type proton ATPase subunit D, V-ATPase subunit D (V-ATPase 28 kDa accessory protein) (Vacuolar proton pump subunit D)	ATP6V1D ATP6M VATD	0.417656	1.47352	1.22553	0.969786	0.808183	1.23082	0.00721312		1
Q9H330	TM245_HUMAN	Transmembrane protein 245 (Protein CG-2)	TMEM245 C9orf5	0.80215	1.29309	1.5184	1.07343	1.00534	1.47665	0.418927		1
Q8NC56	LEMD2_HUMAN	LEM domain-containing protein 2, hLEM2	LEMD2	0.5234	1.05943	1.50571	0.882298	0.750698	1.04056	-0.284125		1
Q14118	DAG1_HUMAN	Dystroglycan 1 (Dystroglycan) (Dystrophin-associated glycoprotein 1) [Cleaved into: Alpha-dystroglycan, Alpha-DG; Beta-dystroglycan, Beta-DG ]	DAG1	0.270633	1.43556	1.61913	1.2456	1.07891	1.23545	0.422074		1
P48651	PTSS1_HUMAN	Phosphatidylserine synthase 1, PSS-1, PtdSer synthase 1, EC 2.7.8.29 (Serine-exchange enzyme I)	PTDSS1 KIAA0024 PSSA		1.24577	1.43647		1.06975	1.11023	0.212518		1
Q9UJ14	GGT7_HUMAN	Glutathione hydrolase 7, EC 3.4.19.13 (Gamma-glutamyltransferase 7, GGT 7, EC 2.3.2.2) (Gamma-glutamyltransferase-like 3) (Gamma-glutamyltransferase-like 5) (Gamma-glutamyltranspeptidase 7) [Cleaved into: Glutathione hydrolase 7 heavy chain; Glutathione hydrolase 7 light chain ]	GGT7 GGTL3 GGTL5		1.47958	1.83308		1.28899	1.13818	0.477415		1
O95164	UBL3_HUMAN	Ubiquitin-like protein 3 (Membrane-anchored ubiquitin-fold protein, HsMUB, MUB) (Protein HCG-1)	UBL3 PNSC1		1.23608	1.06903		0.8856	0.930766	-0.237528		1
Q86VX2	COMD7_HUMAN	COMM domain-containing protein 7	COMMD7 C20orf92		1.7058	1.19911		0.709589	0.826011	-0.651662		1
Q68CQ7	GL8D1_HUMAN	Glycosyltransferase 8 domain-containing protein 1, EC 2.4.1.-	GLT8D1 GALA4A AD-017 MSTP137 UNQ572/PRO1134	0.794304	2.24838	1.13382	0.955477	0.991472	0.947797	-0.0880841		1
Q8N5I4	DHRSX_HUMAN	Dehydrogenase/reductase SDR family member on chromosome X, EC 1.1.-.- (DHRSXY) (Short chain dehydrogenase/reductase family 46C member 1) (Short chain dehydrogenase/reductase family 7C member 6)	DHRSX CXorf11 DHRS5X SDR46C1 SDR7C6 UNQ6508/PRO21433	0.747135	1.21828	1.13003	0.939752	1.03461	1.05374	0.0229981		1
Q53GQ0	DHB12_HUMAN	Very-long-chain 3-oxoacyl-CoA reductase, EC 1.1.1.330 (17-beta-hydroxysteroid dehydrogenase 12, 17-beta-HSD 12) (3-ketoacyl-CoA reductase, KAR) (Estradiol 17-beta-dehydrogenase 12, EC 1.1.1.62) (Short chain dehydrogenase/reductase family 12C member 1)	HSD17B12 SDR12C1		1.20301	1.33294	1.19981	0.786945	1.19033	0.14145		1
Q12846	STX4_HUMAN	Syntaxin-4 (Renal carcinoma antigen NY-REN-31)	STX4 STX4A	0.676043	1.1877	1.06073	1.0534	0.828817	0.926663	-0.162352		1
Q9BQB6	VKOR1_HUMAN	Vitamin K epoxide reductase complex subunit 1, EC 1.17.4.4 (Vitamin K1 2,3-epoxide reductase subunit 1)	VKORC1 VKOR MSTP134 MSTP576 UNQ308/PRO351		1.21964	1.43016		0.951843	1.0339	-0.0176395		1
Q9Y3Y2	CHTOP_HUMAN	Chromatin target of PRMT1 protein (Friend of PRMT1 protein) (Small arginine- and glycine-rich protein, SRAG)	CHTOP C1orf77 FOP HT031 PP7704	0.748713	1.06143	1.15084	1.13503	1.14987	1.09479	0.293913		1
Q9NW15	ANO10_HUMAN	Anoctamin-10 (Transmembrane protein 16K)	ANO10 TMEM16K	0.956455	1.28455	1.40984	1.30516	1.18474	1.09476	0.439128		1
O94907	DKK1_HUMAN	Dickkopf-related protein 1, Dickkopf-1, Dkk-1, hDkk-1 (SK)	DKK1 UNQ492/PRO1008	0.765159	1.21323	1.65075	0.956504	0.840999	1.48962	0.225419		1
P07311	ACYP1_HUMAN	Acylphosphatase-1, EC 3.6.1.7 (Acylphosphatase, erythrocyte isozyme) (Acylphosphatase, organ-common type isozyme) (Acylphosphate phosphohydrolase 1)	ACYP1 ACYPE	2.29921	2.28489	2.35146	0.772514	0.923794	1.20852	-0.079508			1
Q9HAC8	UBTD1_HUMAN	Ubiquitin domain-containing protein 1	UBTD1	1.00047	1.4042	1.12664	1.1858	0.955169	1.05366	0.155031			1
Q9H3H3	CK068_HUMAN	UPF0696 protein C11orf68 (Basophilic leukemia-expressed protein Bles03) (Protein p5326)	C11orf68 BLES03	0.847168	1.28026	1.47876	0.983936	1.09613	1.308	0.300025			1
